# Supplementary material for: Global, Regional, and National Burden of Gallbladder and Biliary Tract Cancer in Adults Aged 55 Years and Older: Analysis of the Global Burden of Disease 1990–2021
Source: Research Square preprint supplement (doi:10.21203/rs.3.rs-7839914/v1), 2025-11-20
Supplement: Supplementary file 1 [file 0c9b357d01d1c04e9d0f4b6e.docx]

**Additional file 1**

- **Fig.S1** The deaths rate per 100,000 population of GBTC aged 55 years and above globally and in 5 territories from 1990 to 2021.
- **Fig.S2** The DALYs rate per 100,000 population of GBTC aged 55 years and above globally and in 5 territories from 1990 to 2021.
- **Fig.S3** The deaths rate per 100,000 population of GBTC aged 55 years and above globally, across 5 territories and 21 GBD regions in 1990 and 2021.
- **Fig.S4** The DALYs rate per 100,000 population of GBTC aged 55 years and above globally, across 5 territories and 21 GBD regions in 1990 and 2021.
- **Fig.S5** Percentage change in death cases of GBTC aged 55 years and above across 204 countries in 1990 and 2021.
- **Fig.S6** Percentage change in DALYs cases of GBTC aged 55 years and above across 204 countries in 1990 and 2021.
- **Fig.S7** EAPC of incident rates of GBTC aged 55 years and above burden across 204 countries from 1990 to 2021.
- **Fig.S8** EAPC of DALYs rates of GBTC aged 55 years and above across 204 countries from 1990 to 2021.
- **Fig.S9** Death cases of GBTC aged 55 years and above in 9 age groups (55–95+ years, 5-year intervals) from 1990 to 2021 globally and in 5 territories (low to high SDIs).
- **Fig.S10** Incident cases of GBTC aged 55 years and above in 9 age groups (55–95+ years, 5-year intervals) from 1990 to 2021 globally and in 5 territories (low to high SDIs).
- **Fig.S11** DALYs cases of GBTC burden aged 55 years and above in 9 age groups (55–95+ years, 5-year intervals) from 1990 to 2021 globally and in 5 territories (low to high SDIs).
- **Fig.S12** Percentage change in incident cases of GBTC aged 55 years and above across 9 age groups globally and in 5 territories in 1990 and 2021.
- **Fig.S13** Percentage change in death cases of EAPC among individuals GBTC aged 55 years and above across 9 age groups globally and in 5 territories in 1990 and 2021.
- **Fig.S14** EAPC of incident rates of GBTC burden aged 55 years and above across 9 age groups globally and in 5 territories from 1990 to 2021.
- **Fig.S15** EAPC of DALYs rates of GBTC burden aged 55 years and above across 9 age groups globally and in 5 territories from 1990 to 2021.
- **Fig.S16** The distribution of incident cases of GBTC burden aged 55 years and above across 7 age groups as percentages globally, in 5 territories, and 21 GBD regions in 1990 and 2021.
- **Fig.S17** The distribution of death cases of GBTC burden aged 55 years and above across 7 age groups as percentages globally, in 5 territories, and 21 GBD regions in 1990 and 2021.
- **Fig.S18** The distribution of DALY cases of GBTC burden aged 55 years and above across 7 age groups as percentages globally, in 5 territories, and 21 GBD regions in 1990 and 2021.
- **Fig.S19** The associations between the SDI and death rates per 100,000 population of GBTC aged 55 years and above across 21 GBD regions.
- **Fig.S20** The associations between the SDI and incident rates per 100,000 population of GBTC aged 55 years and above across 21 GBD regions.
- **Fig.S21** The associations between the SDI and DALYs rates per 100,000 population of GBTC aged 55 years and above across 21 GBD regions.


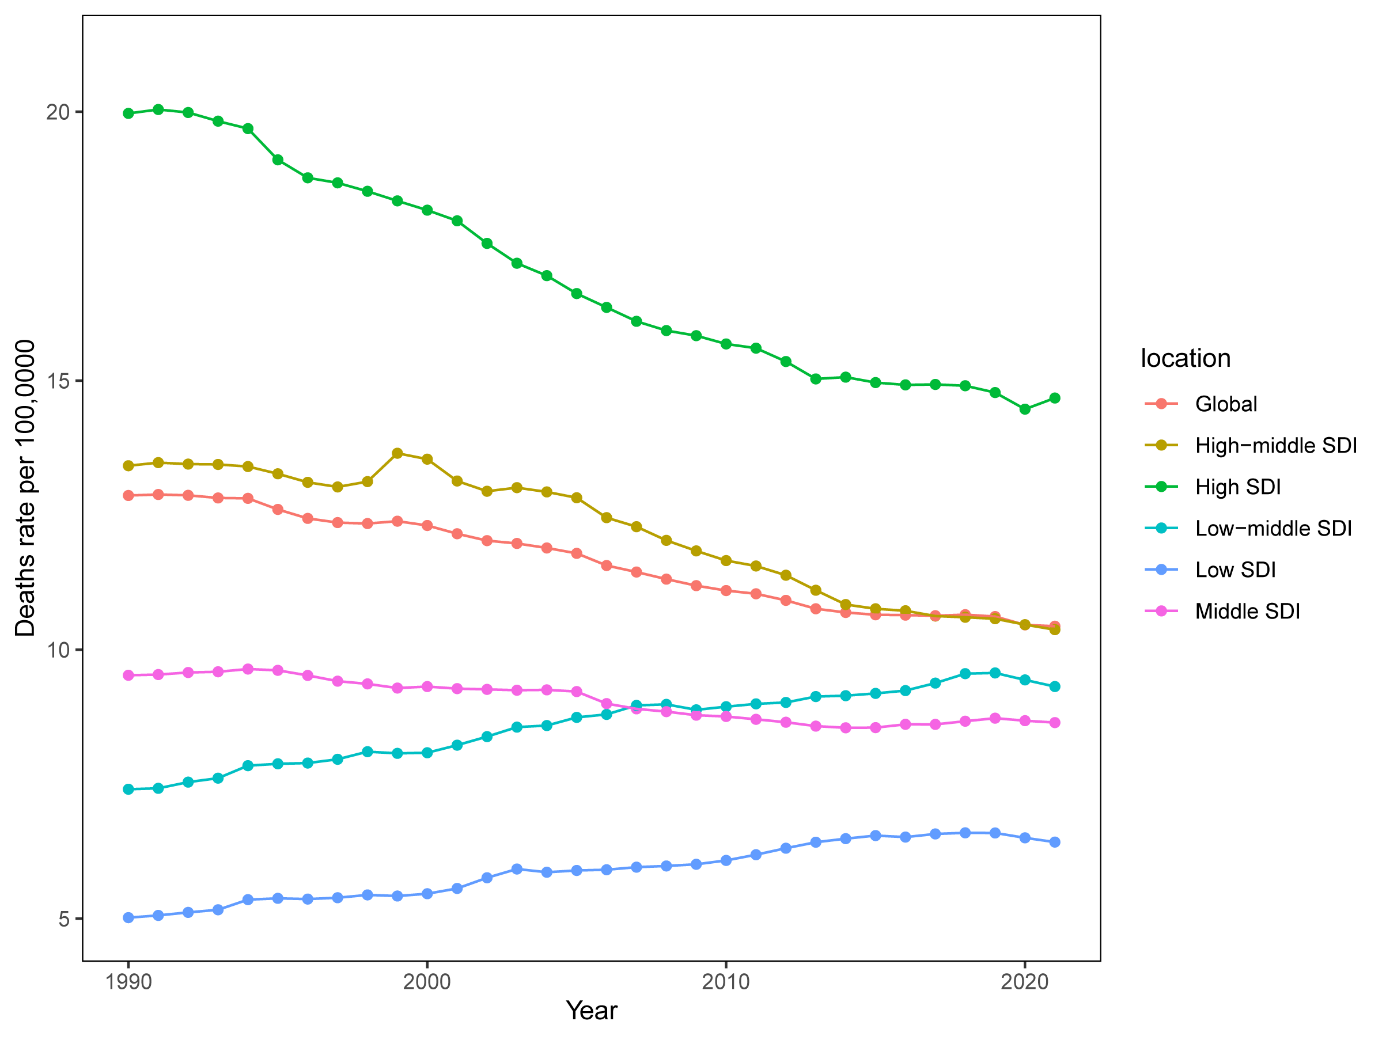


**Fig.S1** The deaths rate per 100,000 population of GBTC aged 55 years and above globally and in 5 territories from 1990 to 2021.


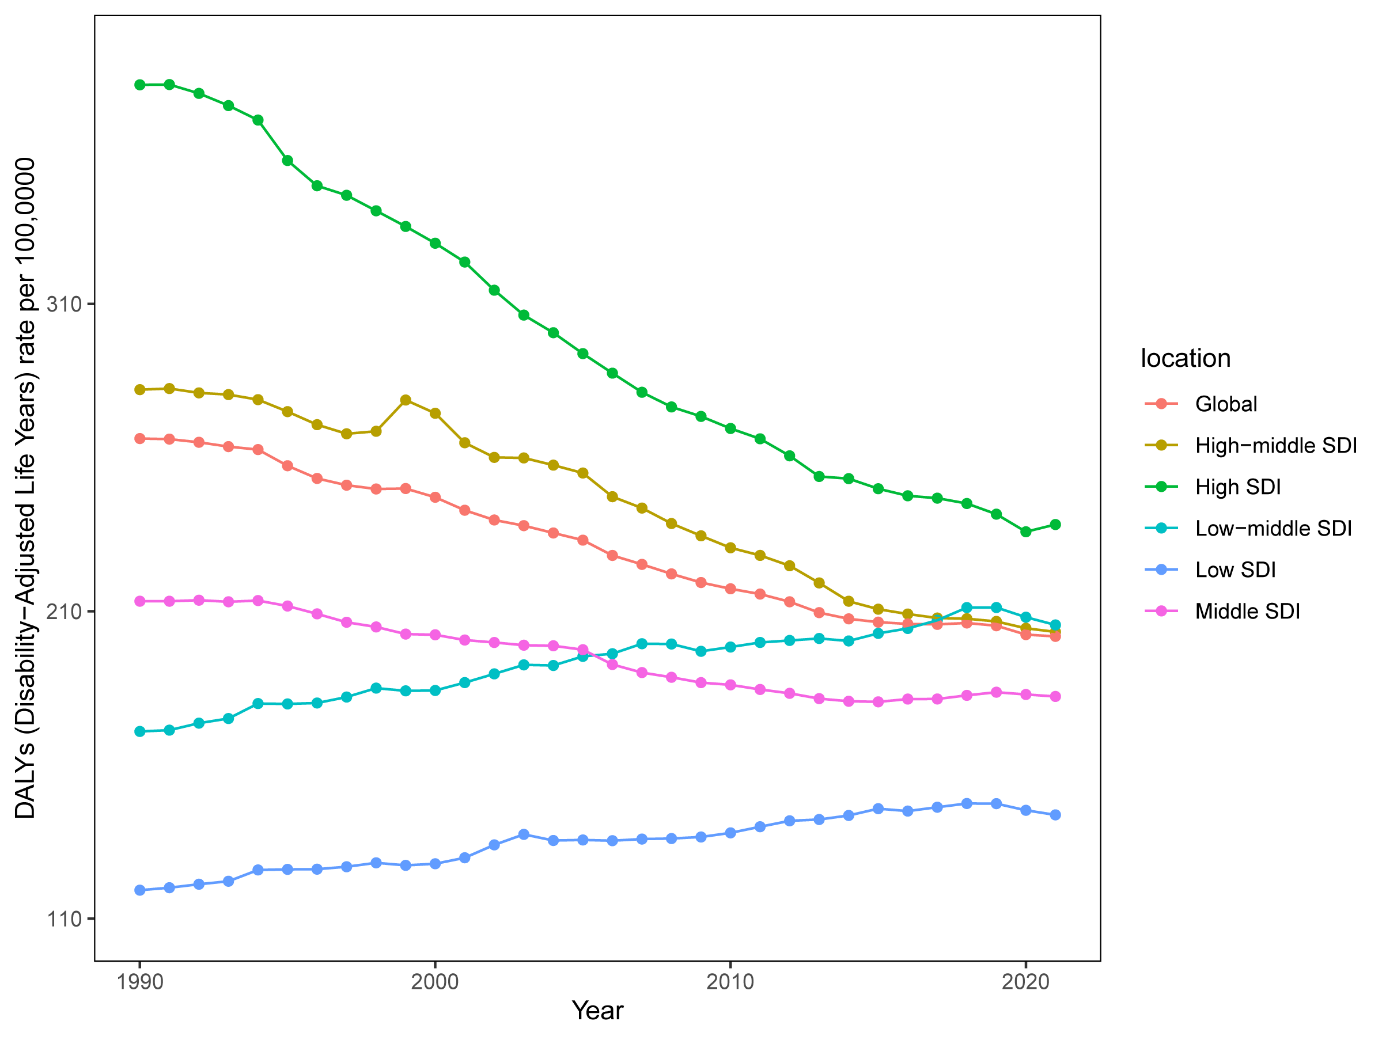


**Fig.S2** The DALYs rate per 100,000 population of GBTC aged 55 years and above globally and in 6 territories from 1990 to 2021.
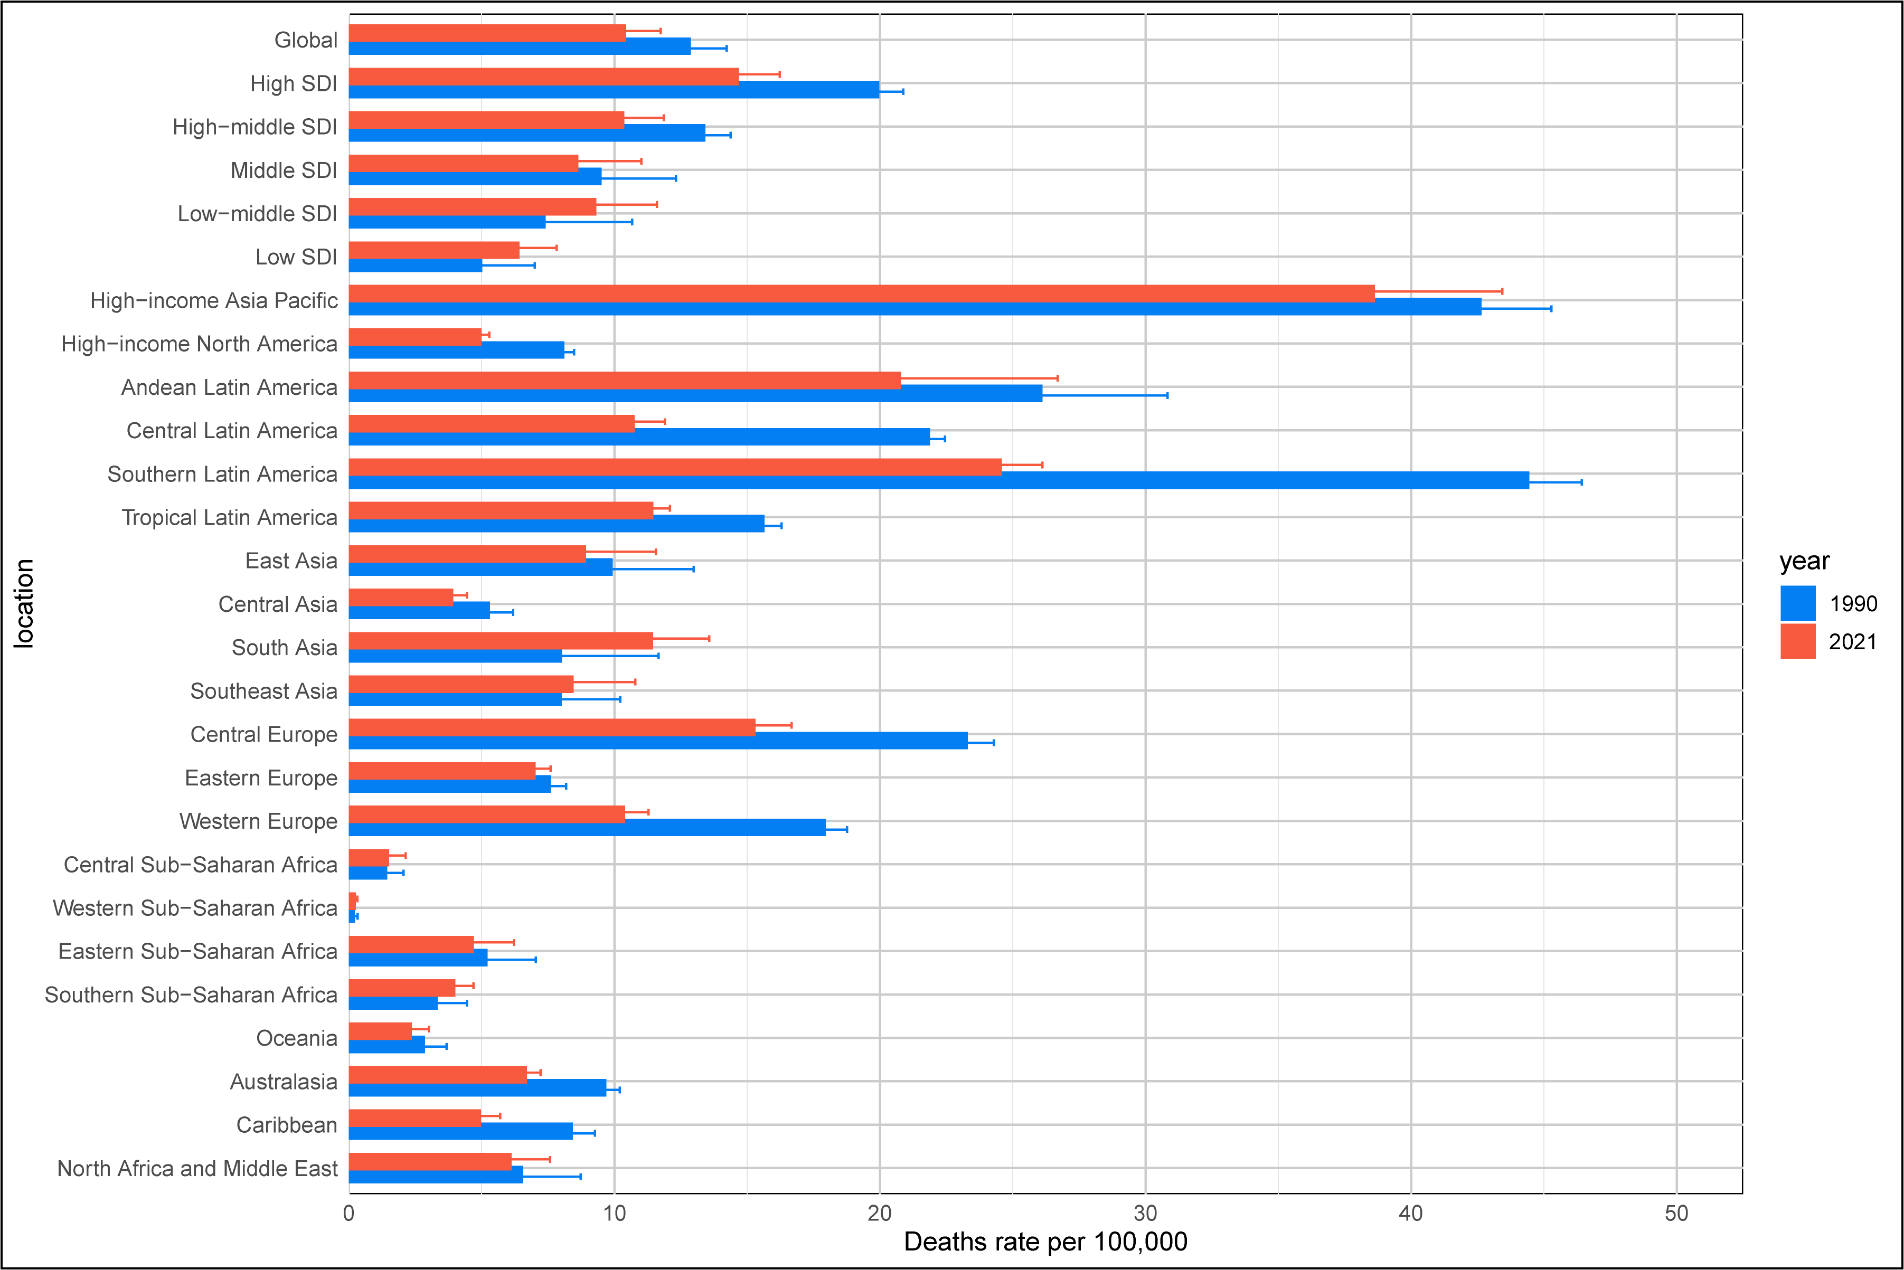


**Fig.S3** The deaths rate per 100,000 population of GBTC aged 55 years and above globally, across 5 territories and 21 GBD regions in 1990 and 2021.


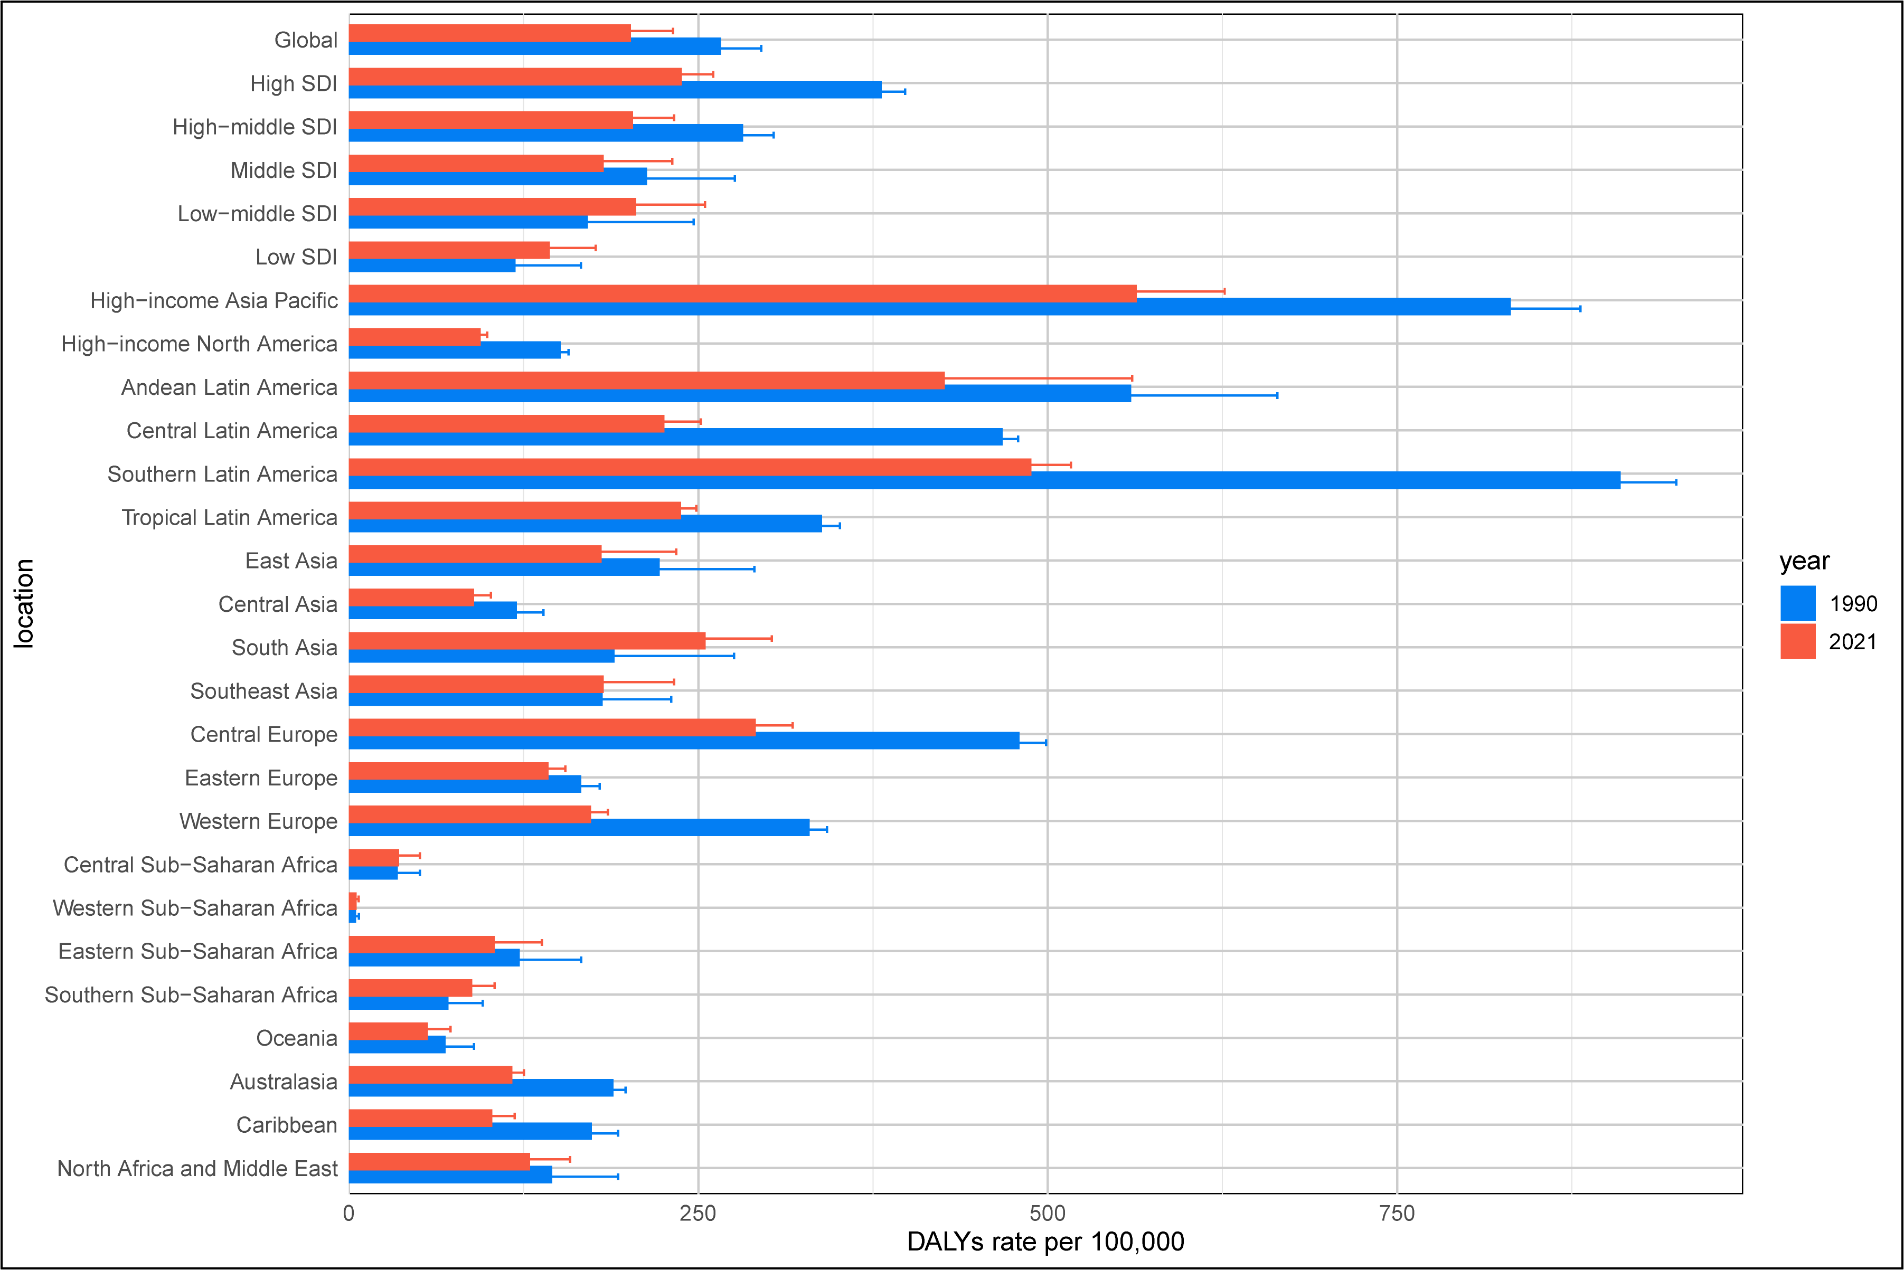


**Fig.S4** The DALYs rate per 100,000 population of GBTC aged 55 years and above globally, across 5 territories and 21 GBD regions in 1990 and 2021.


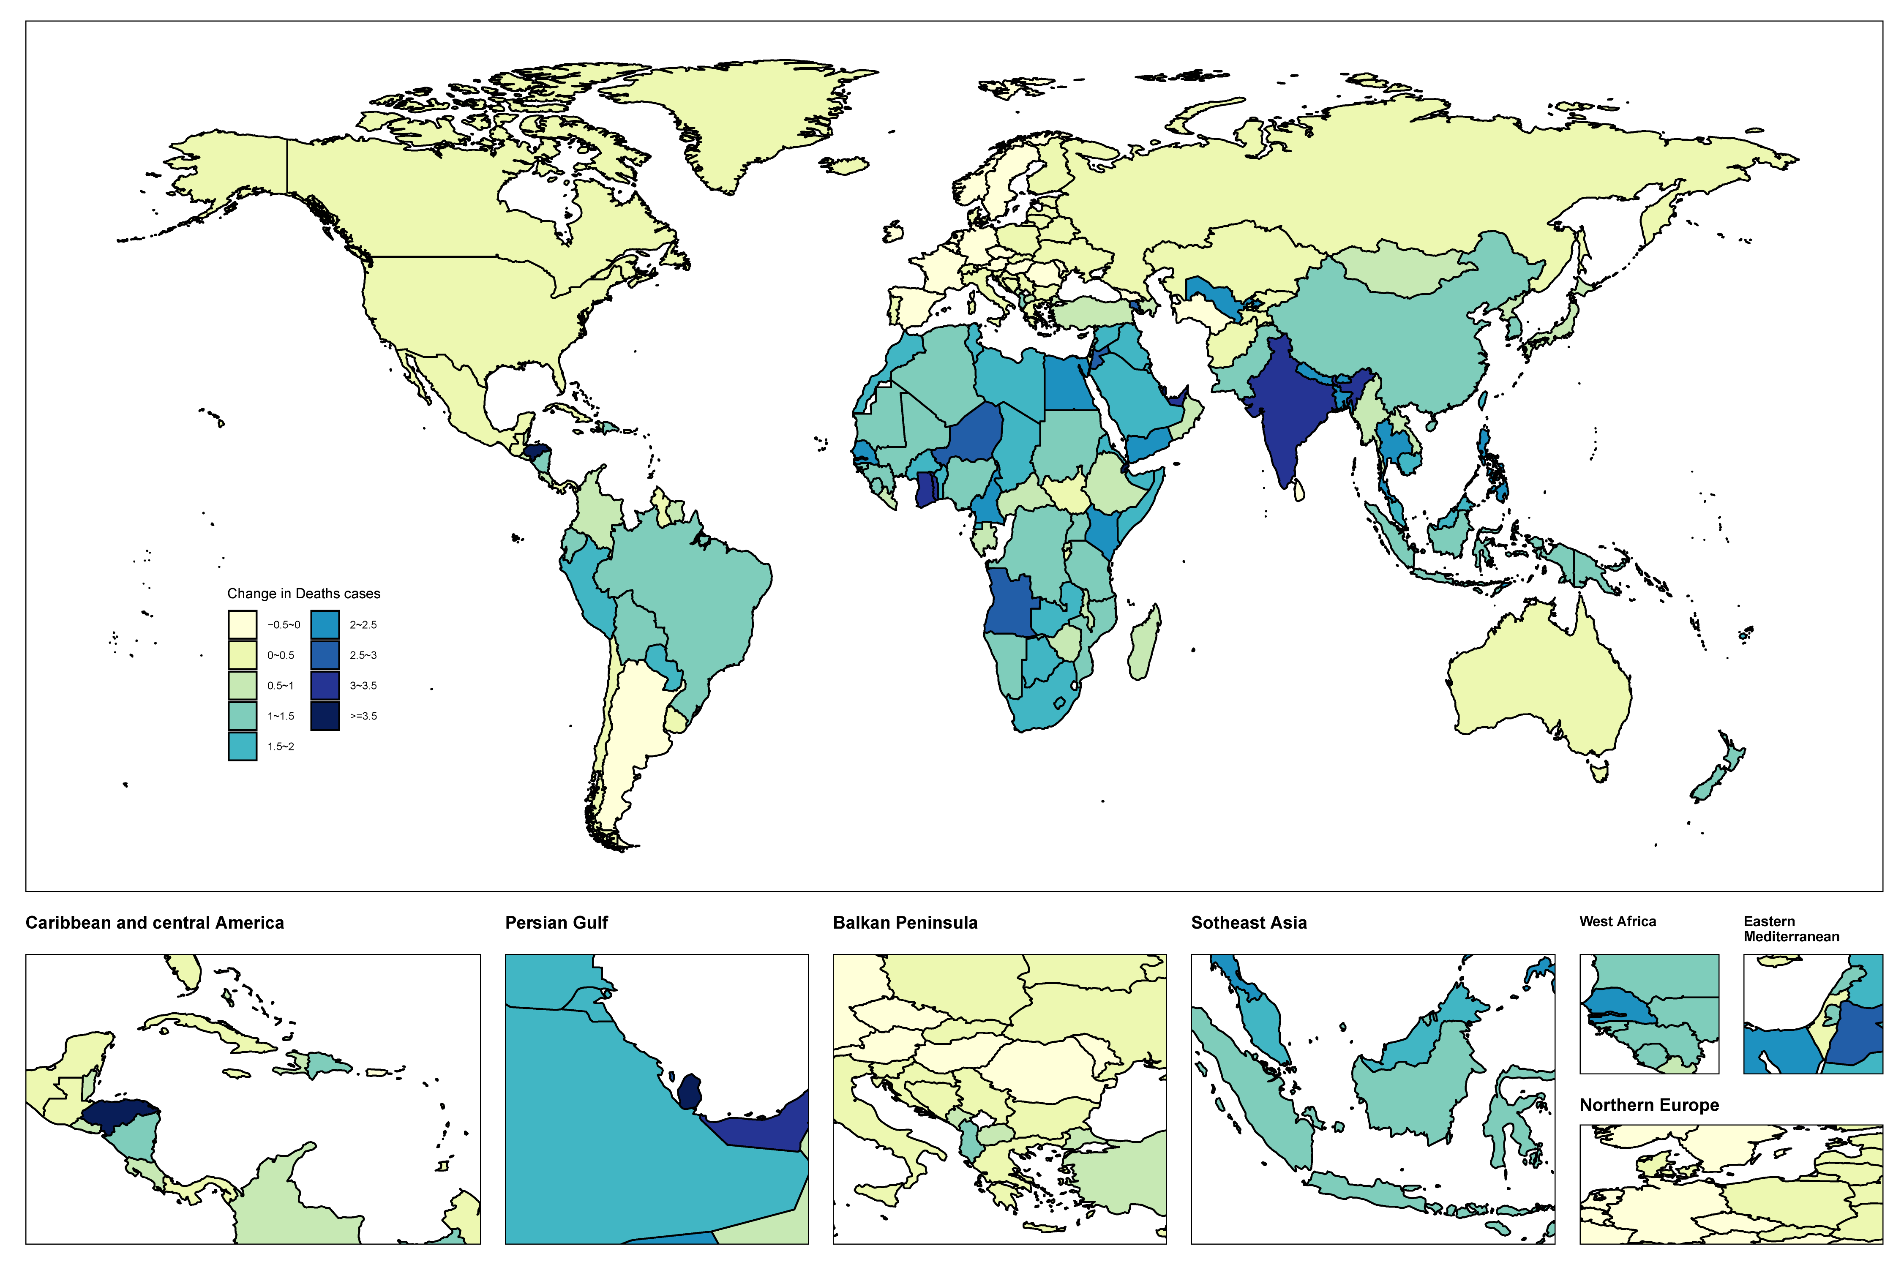


**Fig.S5** Percentage change in death cases of GBTC aged 55 years and above across 204 countries in 1990 and 2021.


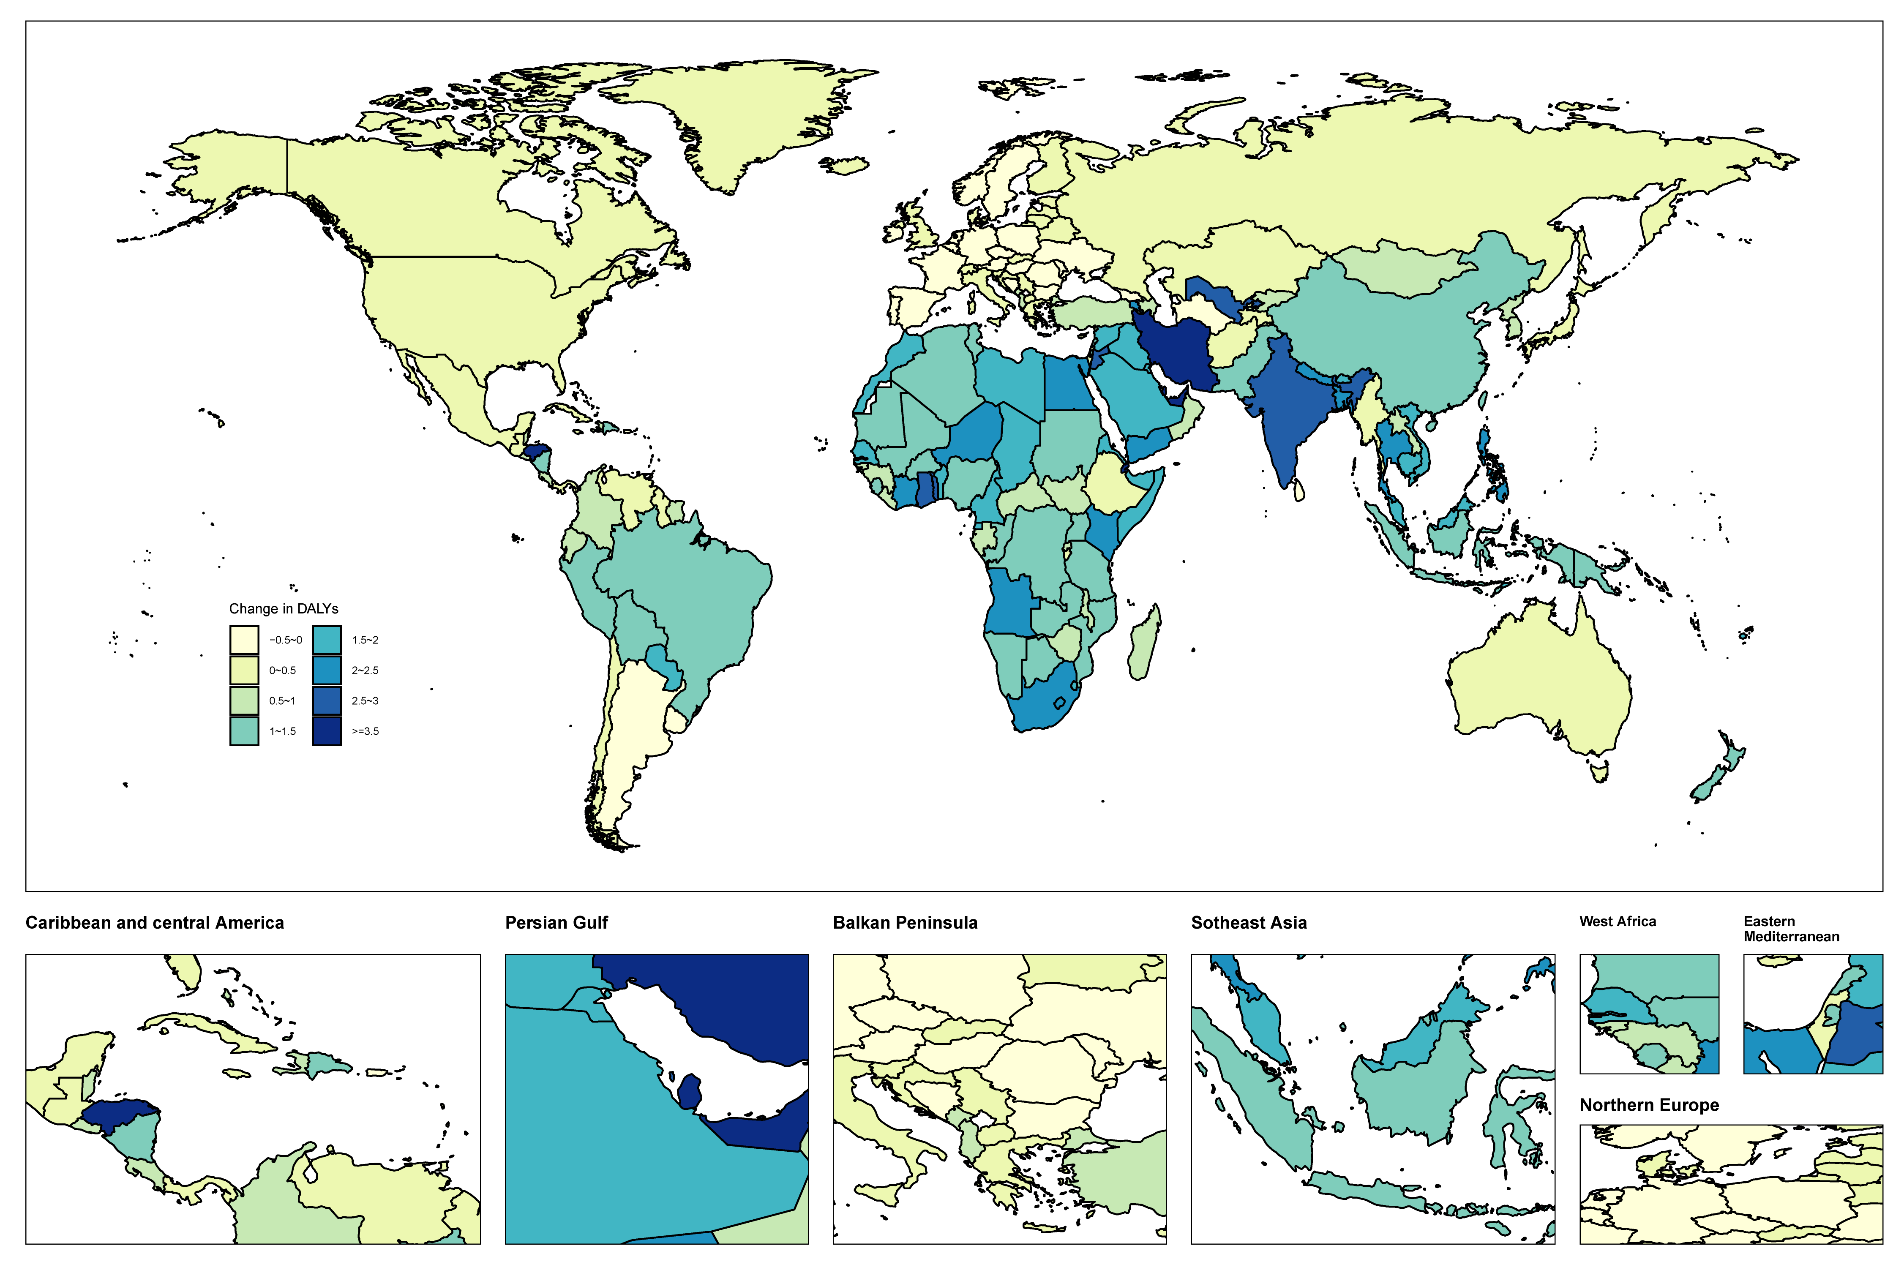


**Fig.S6** Percentage change in DALYs cases of GBTC aged 55 years and above across 204 countries in 1990 and 2021.


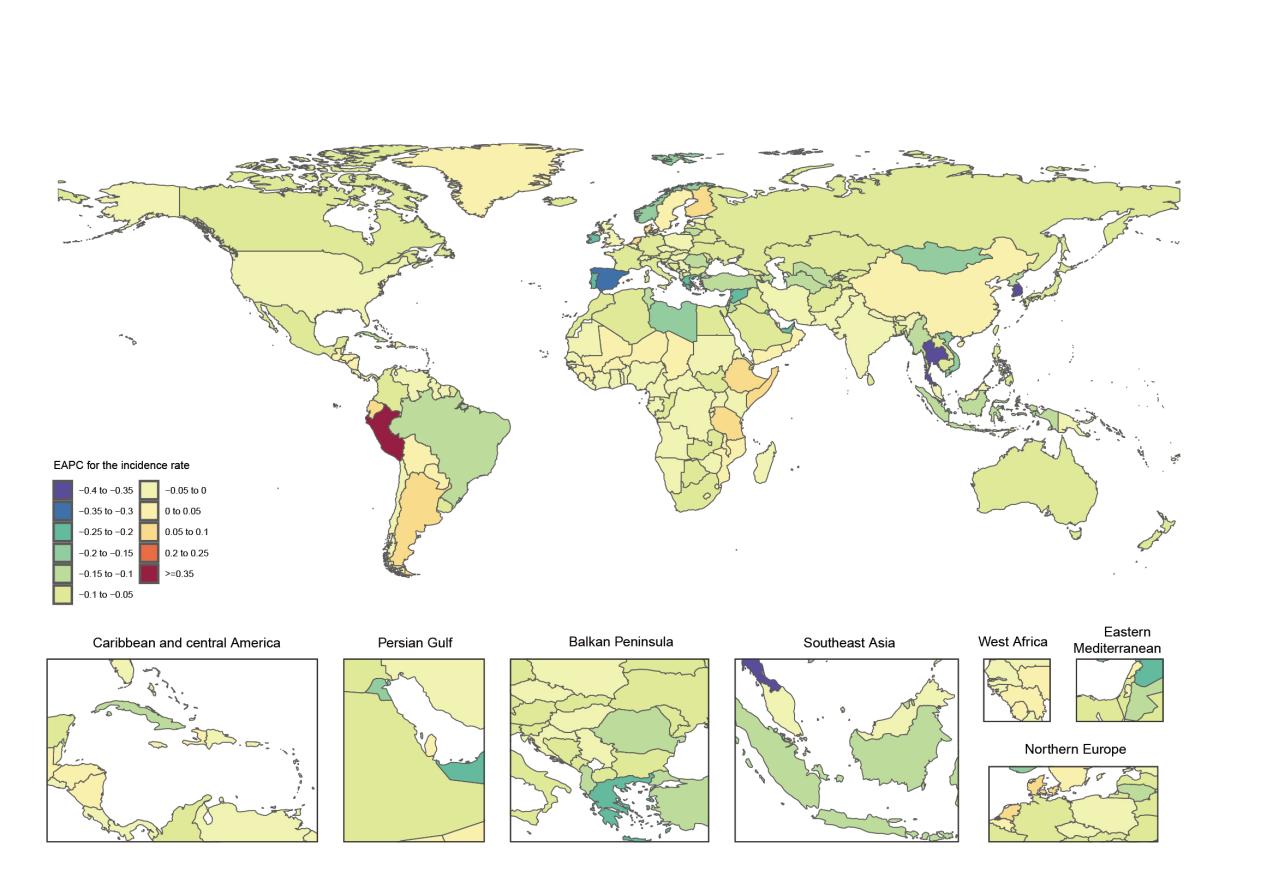


**Fig.S7** EAPC of incident rates of GBTC aged 55 years and above burden across 204 countries from 1990 to 2021.


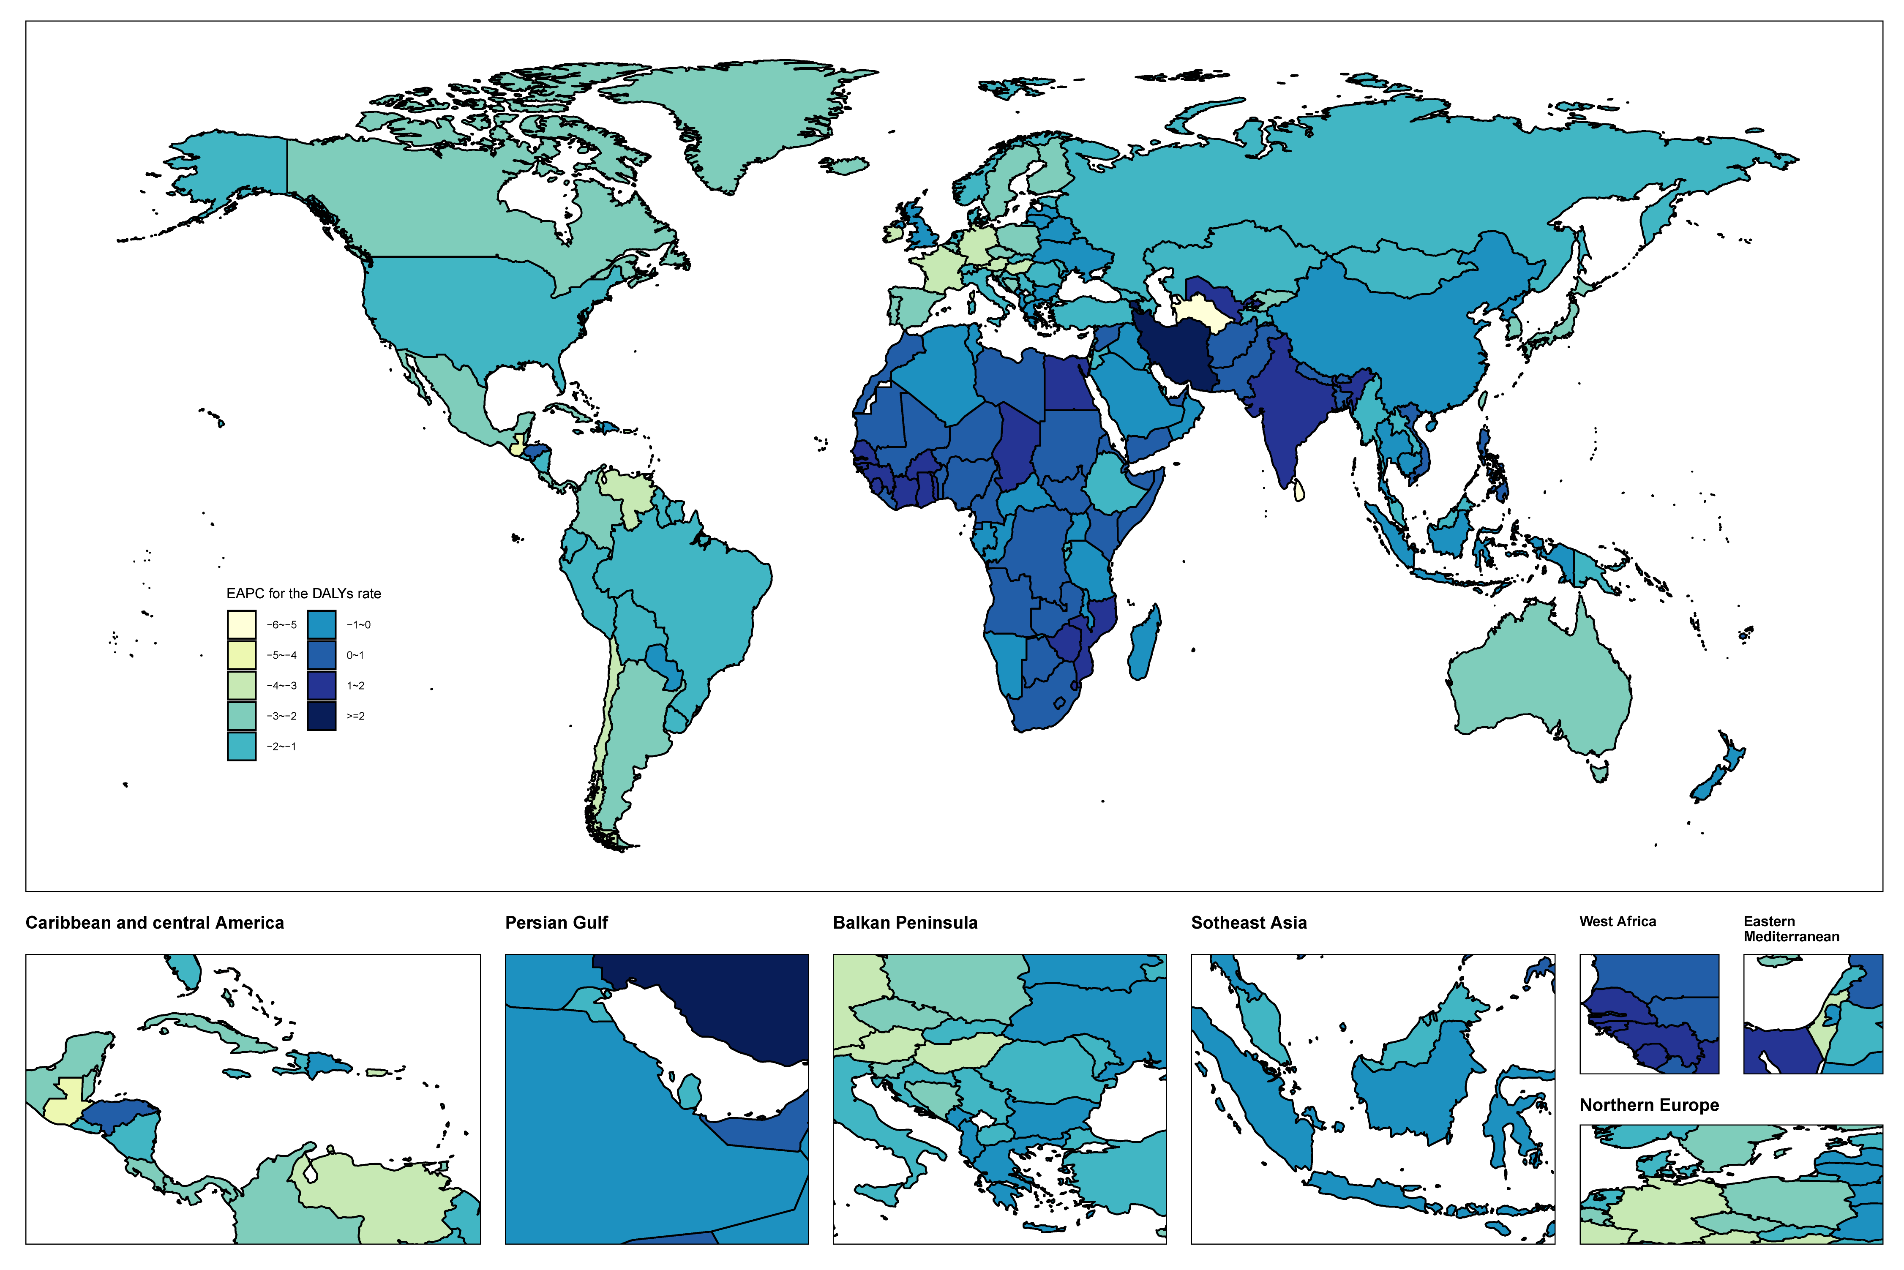


**Fig.S8** EAPC of DALYs rates of GBTC aged 55 years and above across 204 countries from 1990 to 2021.


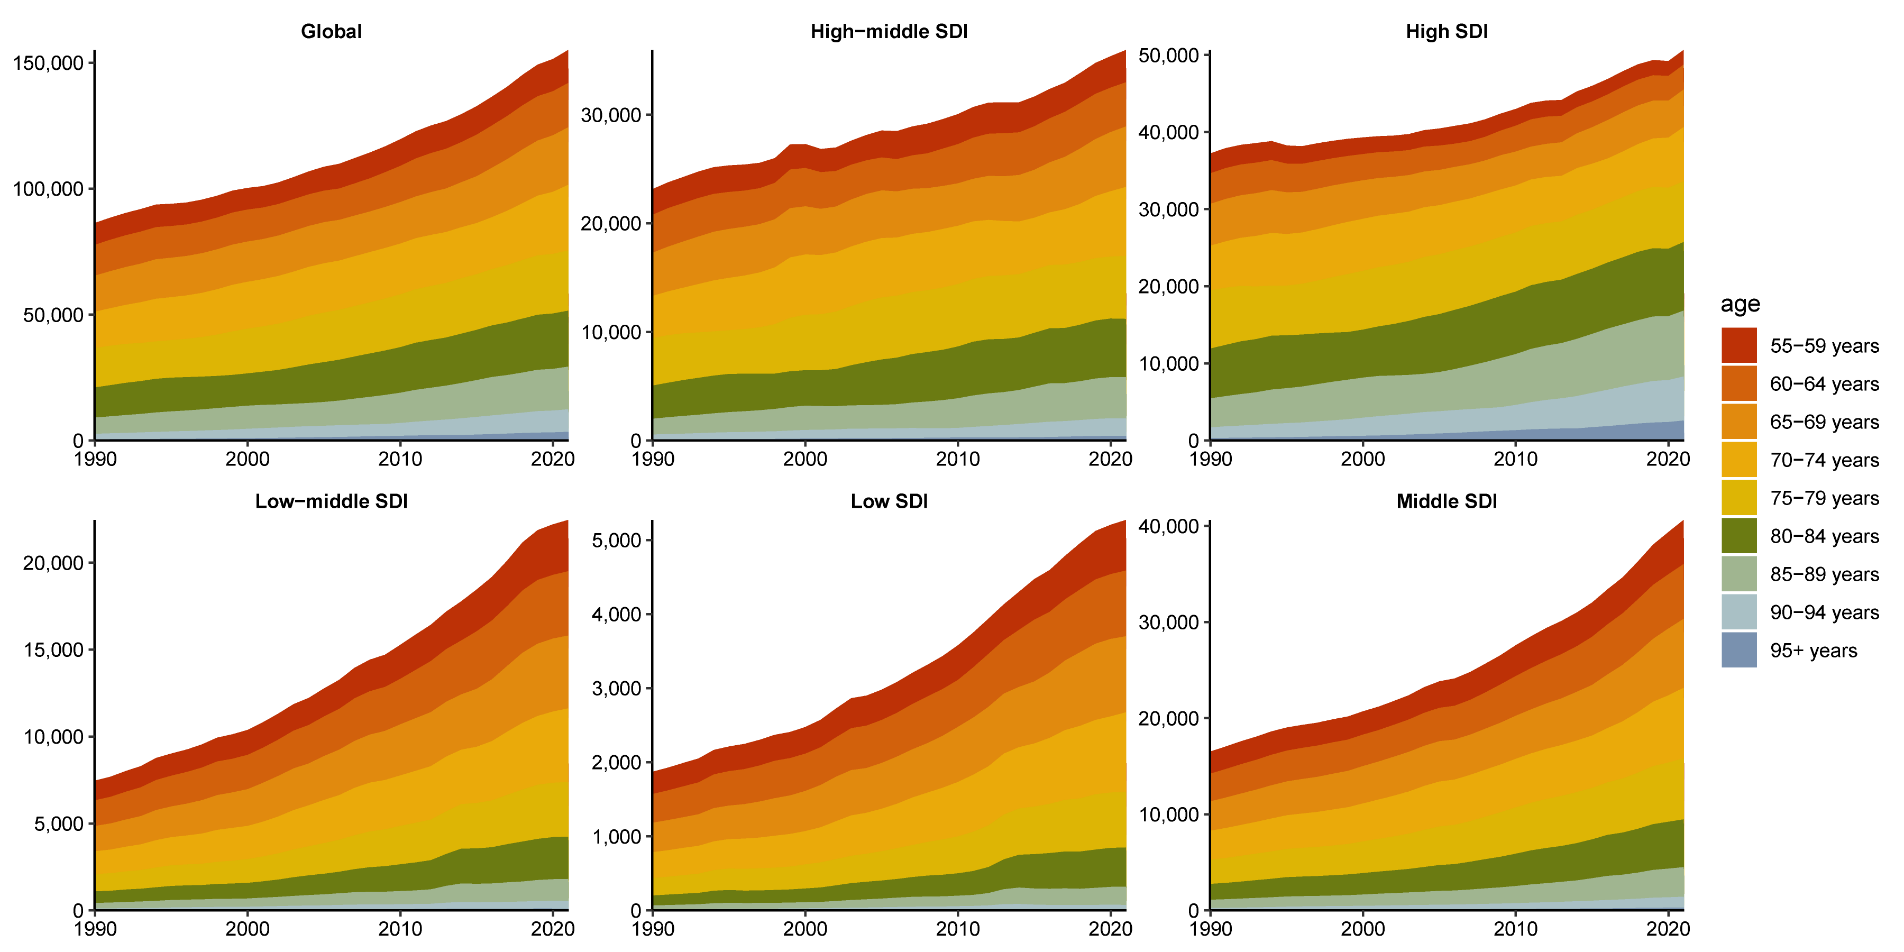


**Fig.S9** Death cases of GBTC aged 55 years and above in 9 age groups (55–95+ years, 5-year intervals) from 1990 to 2021 globally and in 5 territories (low to high SDIs).


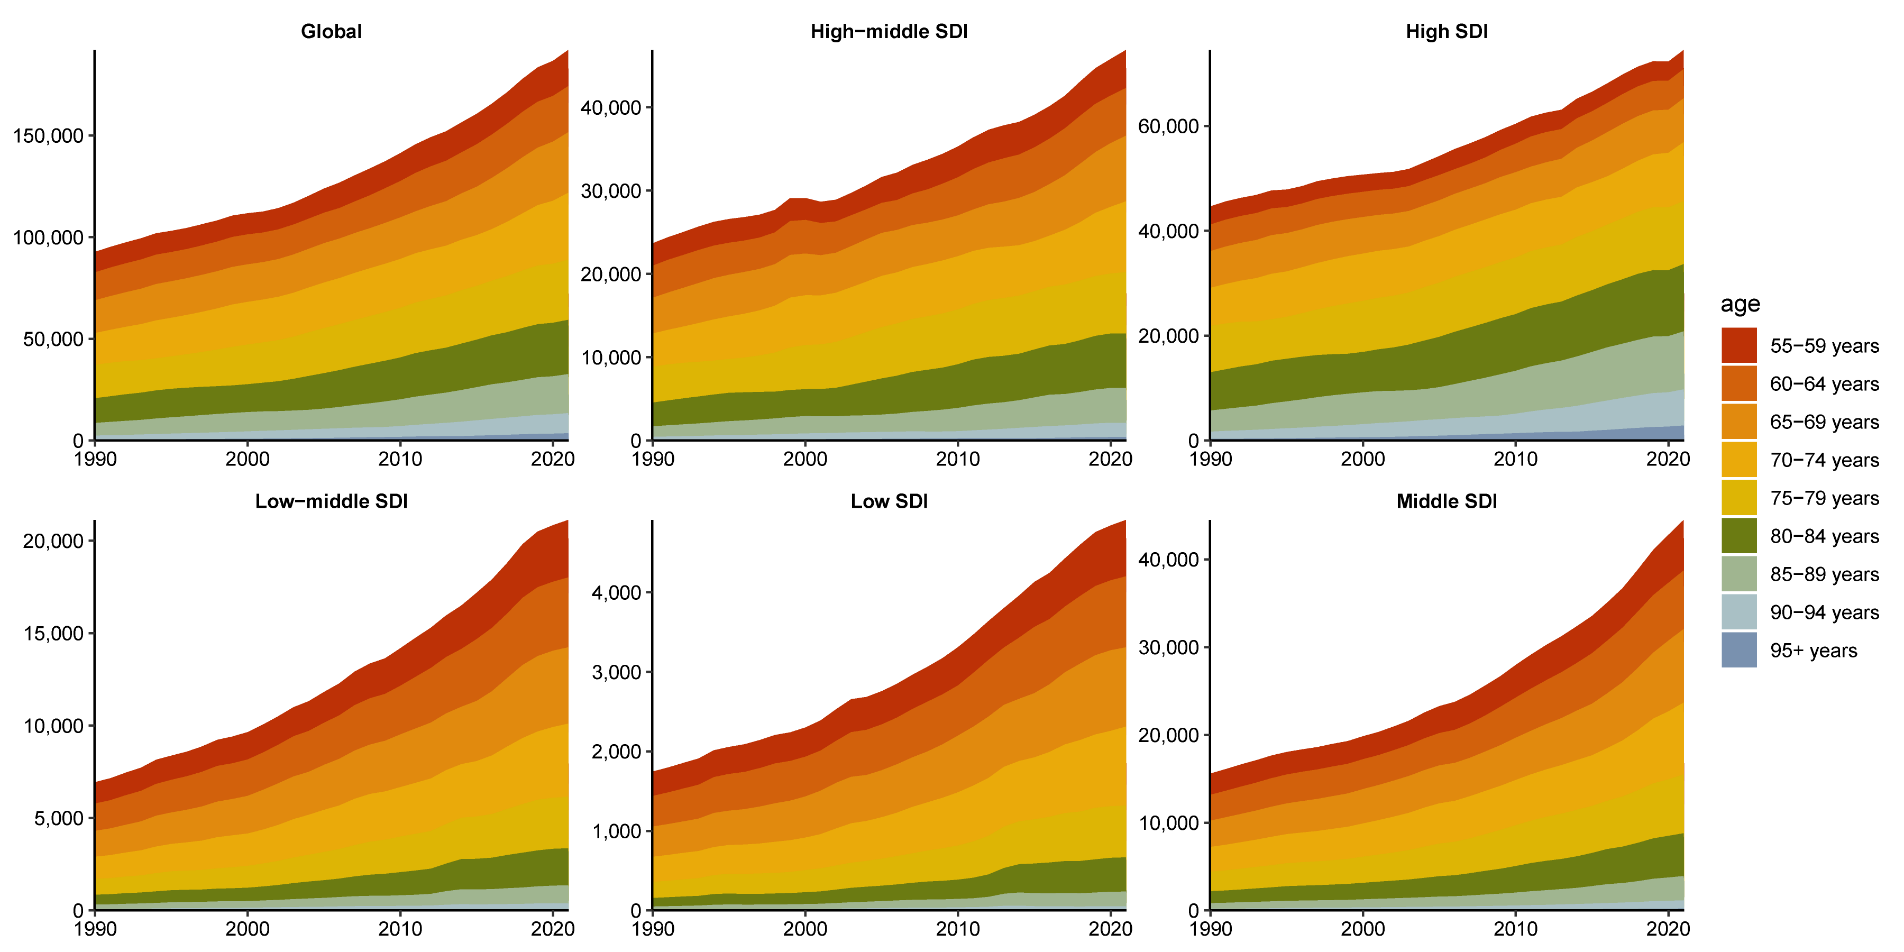


**Fig.S10** Incident cases of GBTC aged 55 years and above in 9 age groups (55–95+ years, 5-year intervals) from 1990 to 2021 globally and in 5 territories (low to high SDIs).


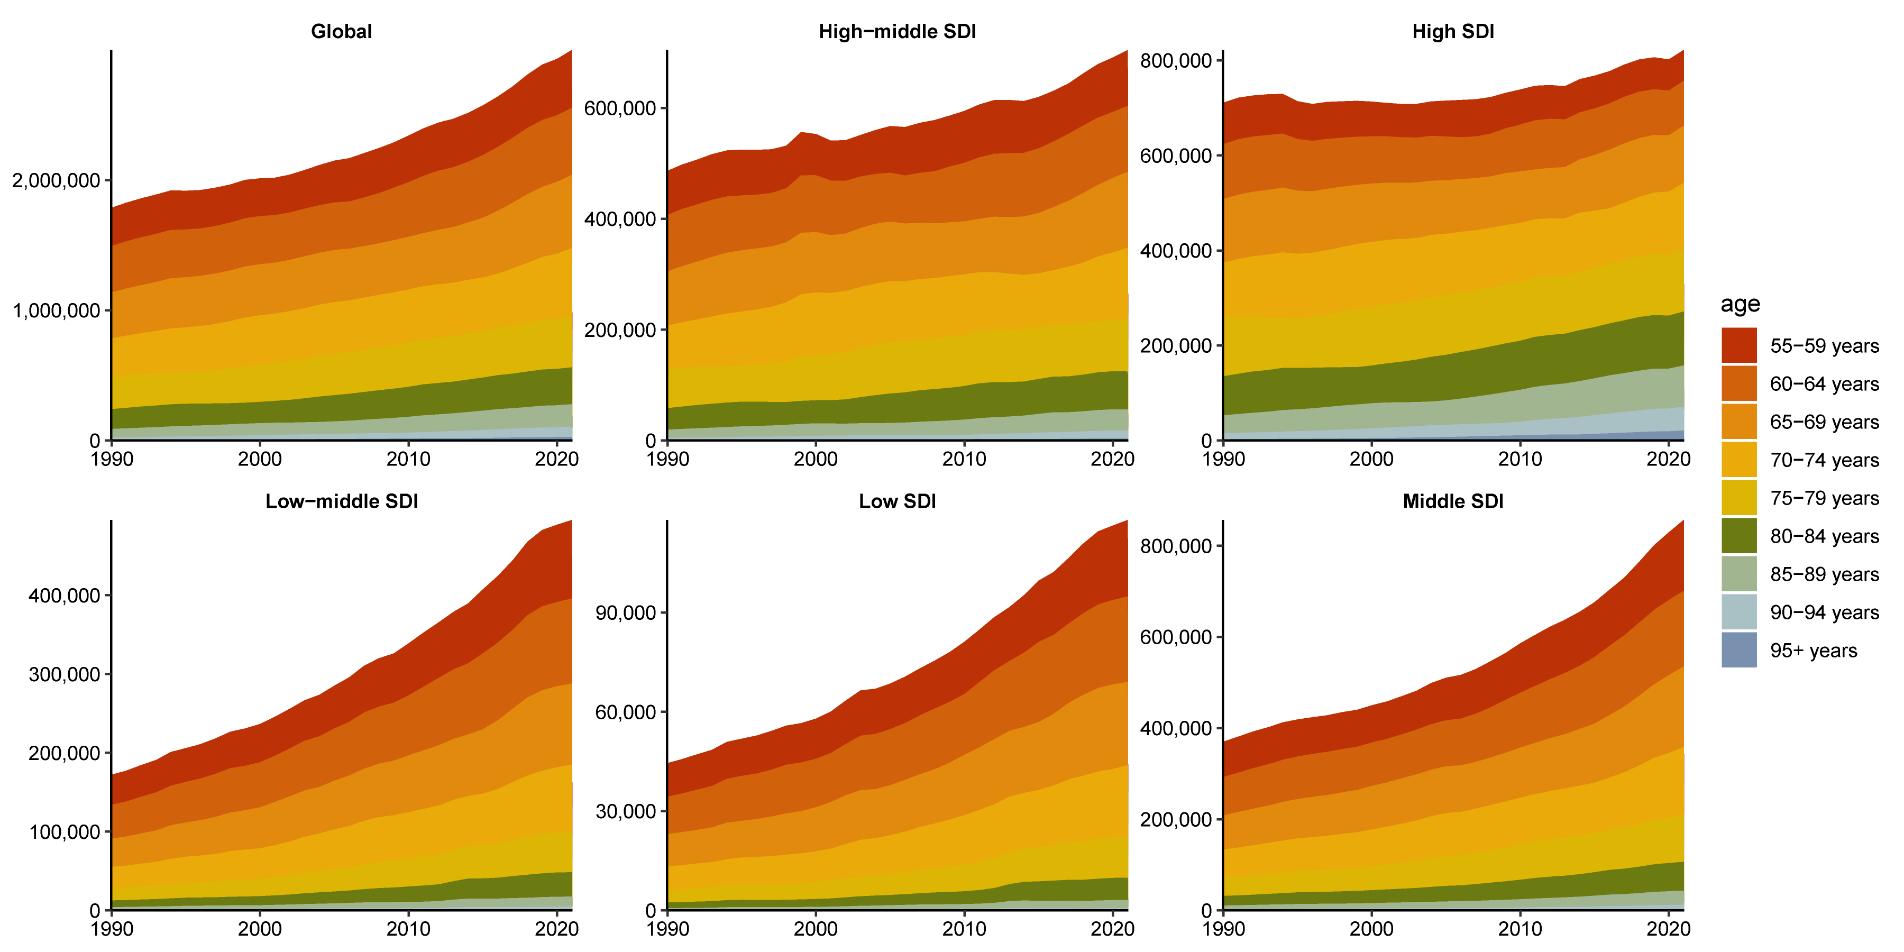


**Fig.S11** DALYs cases of GBTC burden aged 55 years and above in 9 age groups (55–95+ years, 5-year intervals) from 1990 to 2021 globally and in 5 territories (low to high SDIs).


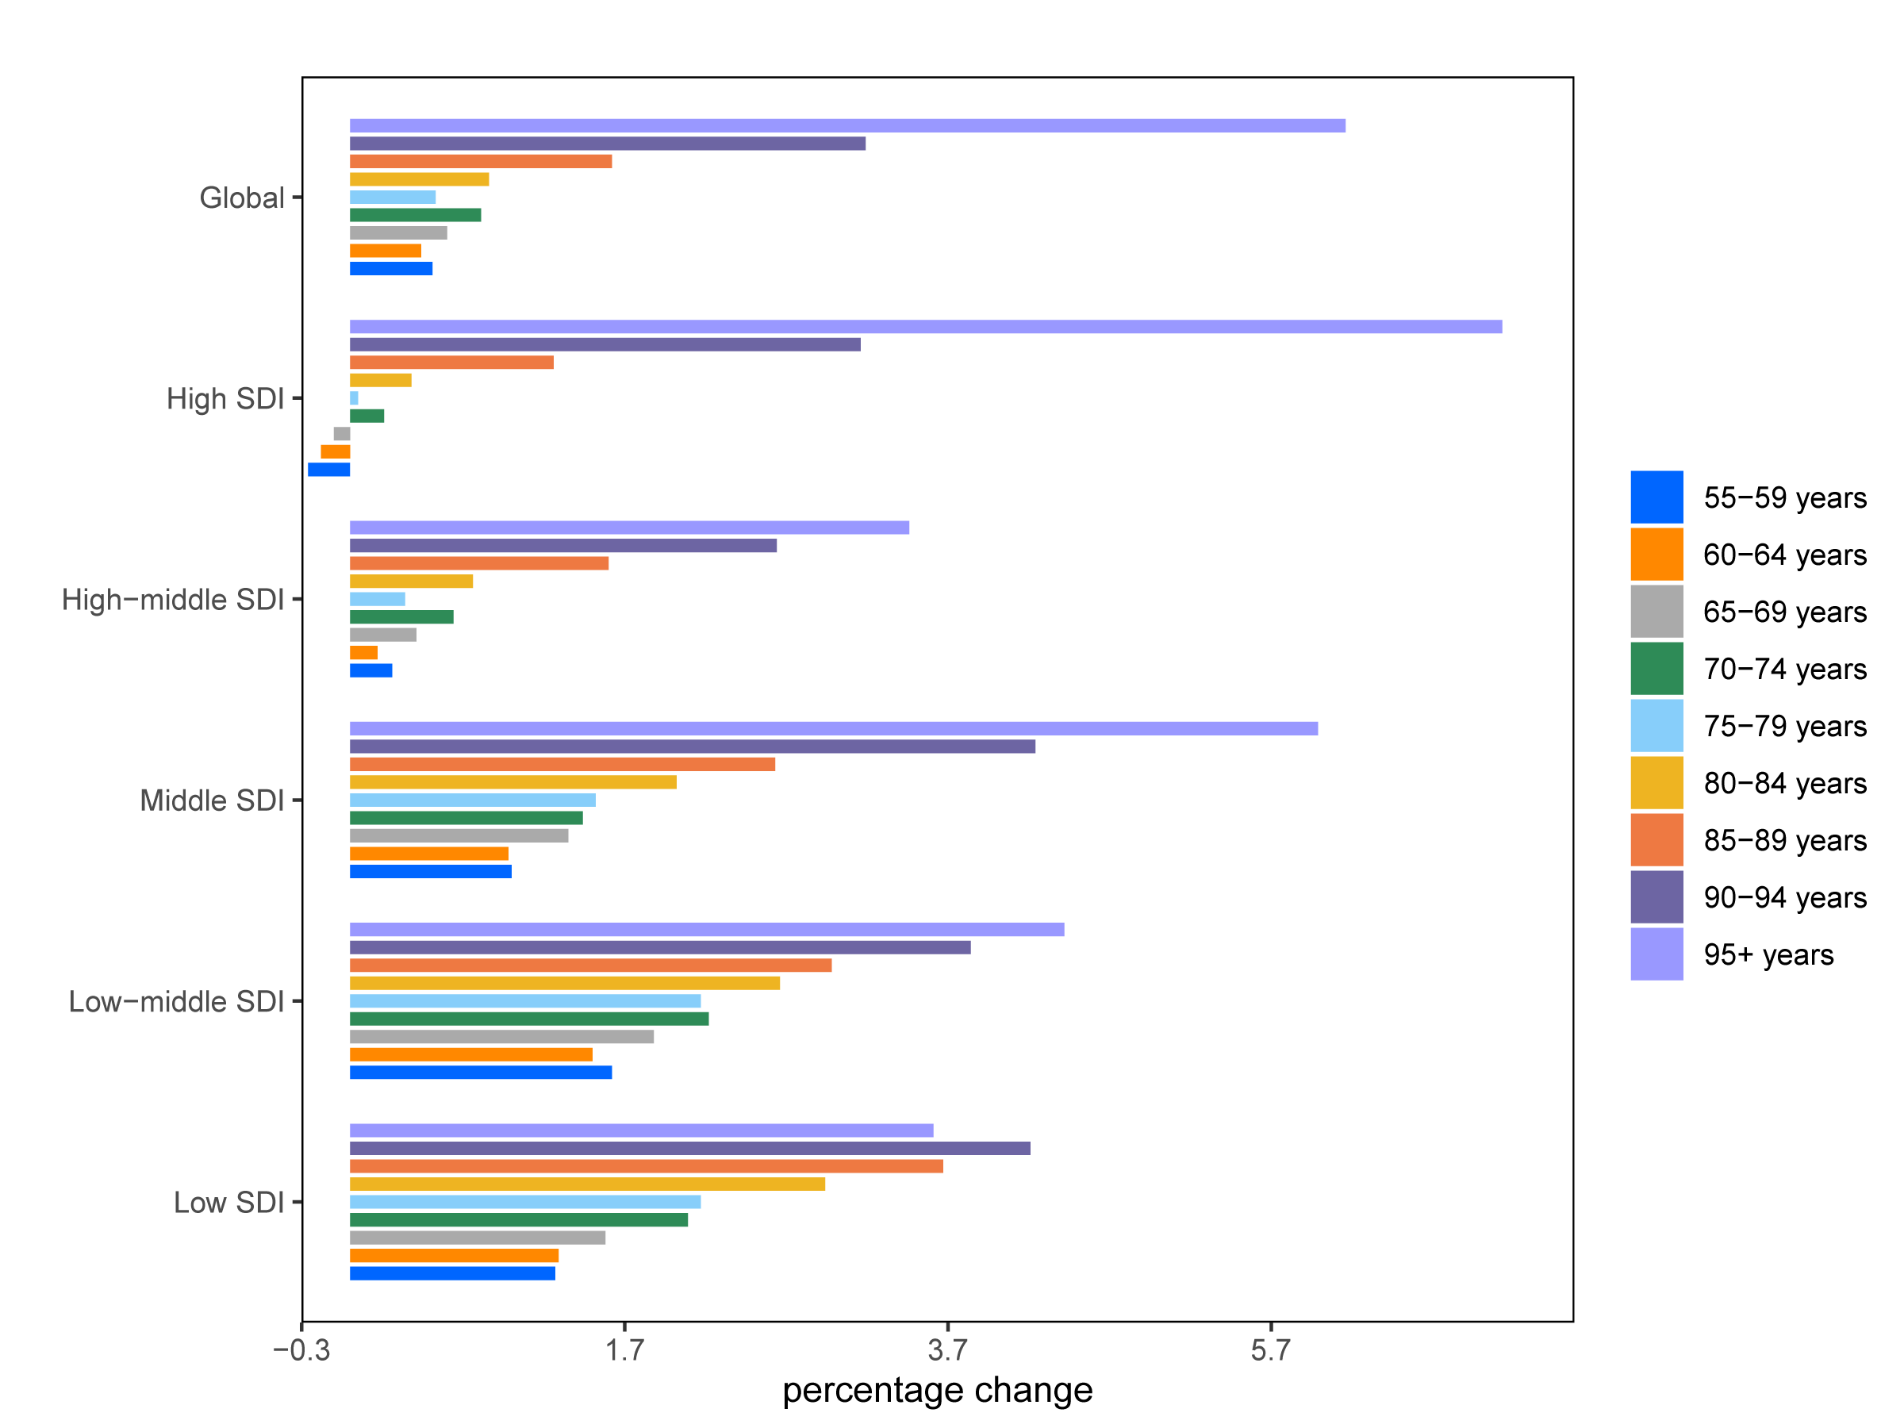


**Fig.S12** Percentage change in incident cases of GBTC aged 55 years and above across 9 age groups globally and in 5 territories in 1990 and 2021.


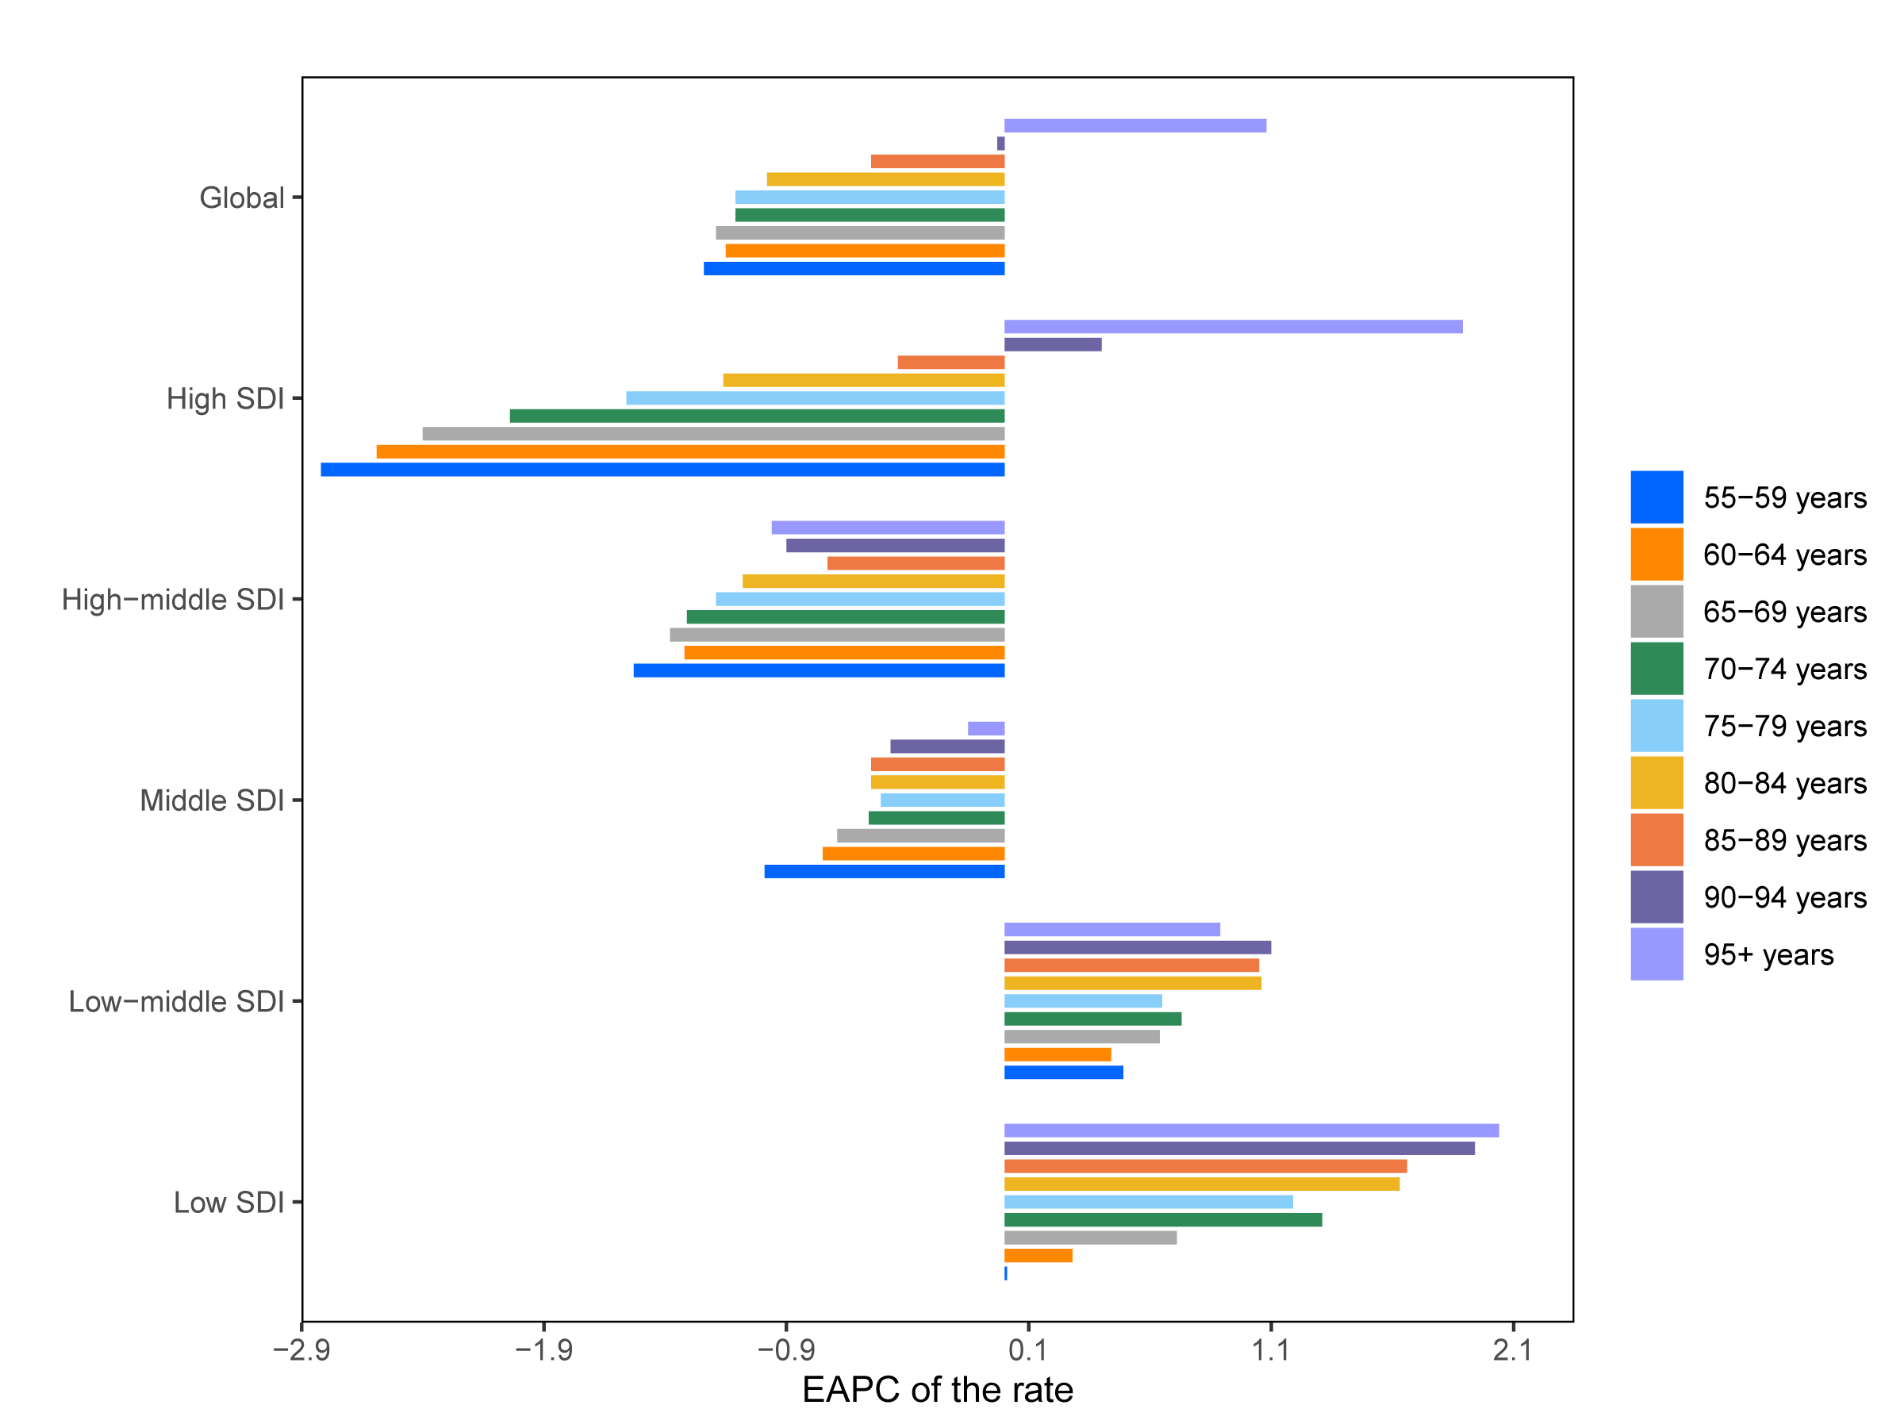


**Fig.S13** Percentage change in death cases of EAPC among individuals GBTC aged 55 years and above across 9 age groups globally and in 5 territories in 1990 and 2021.


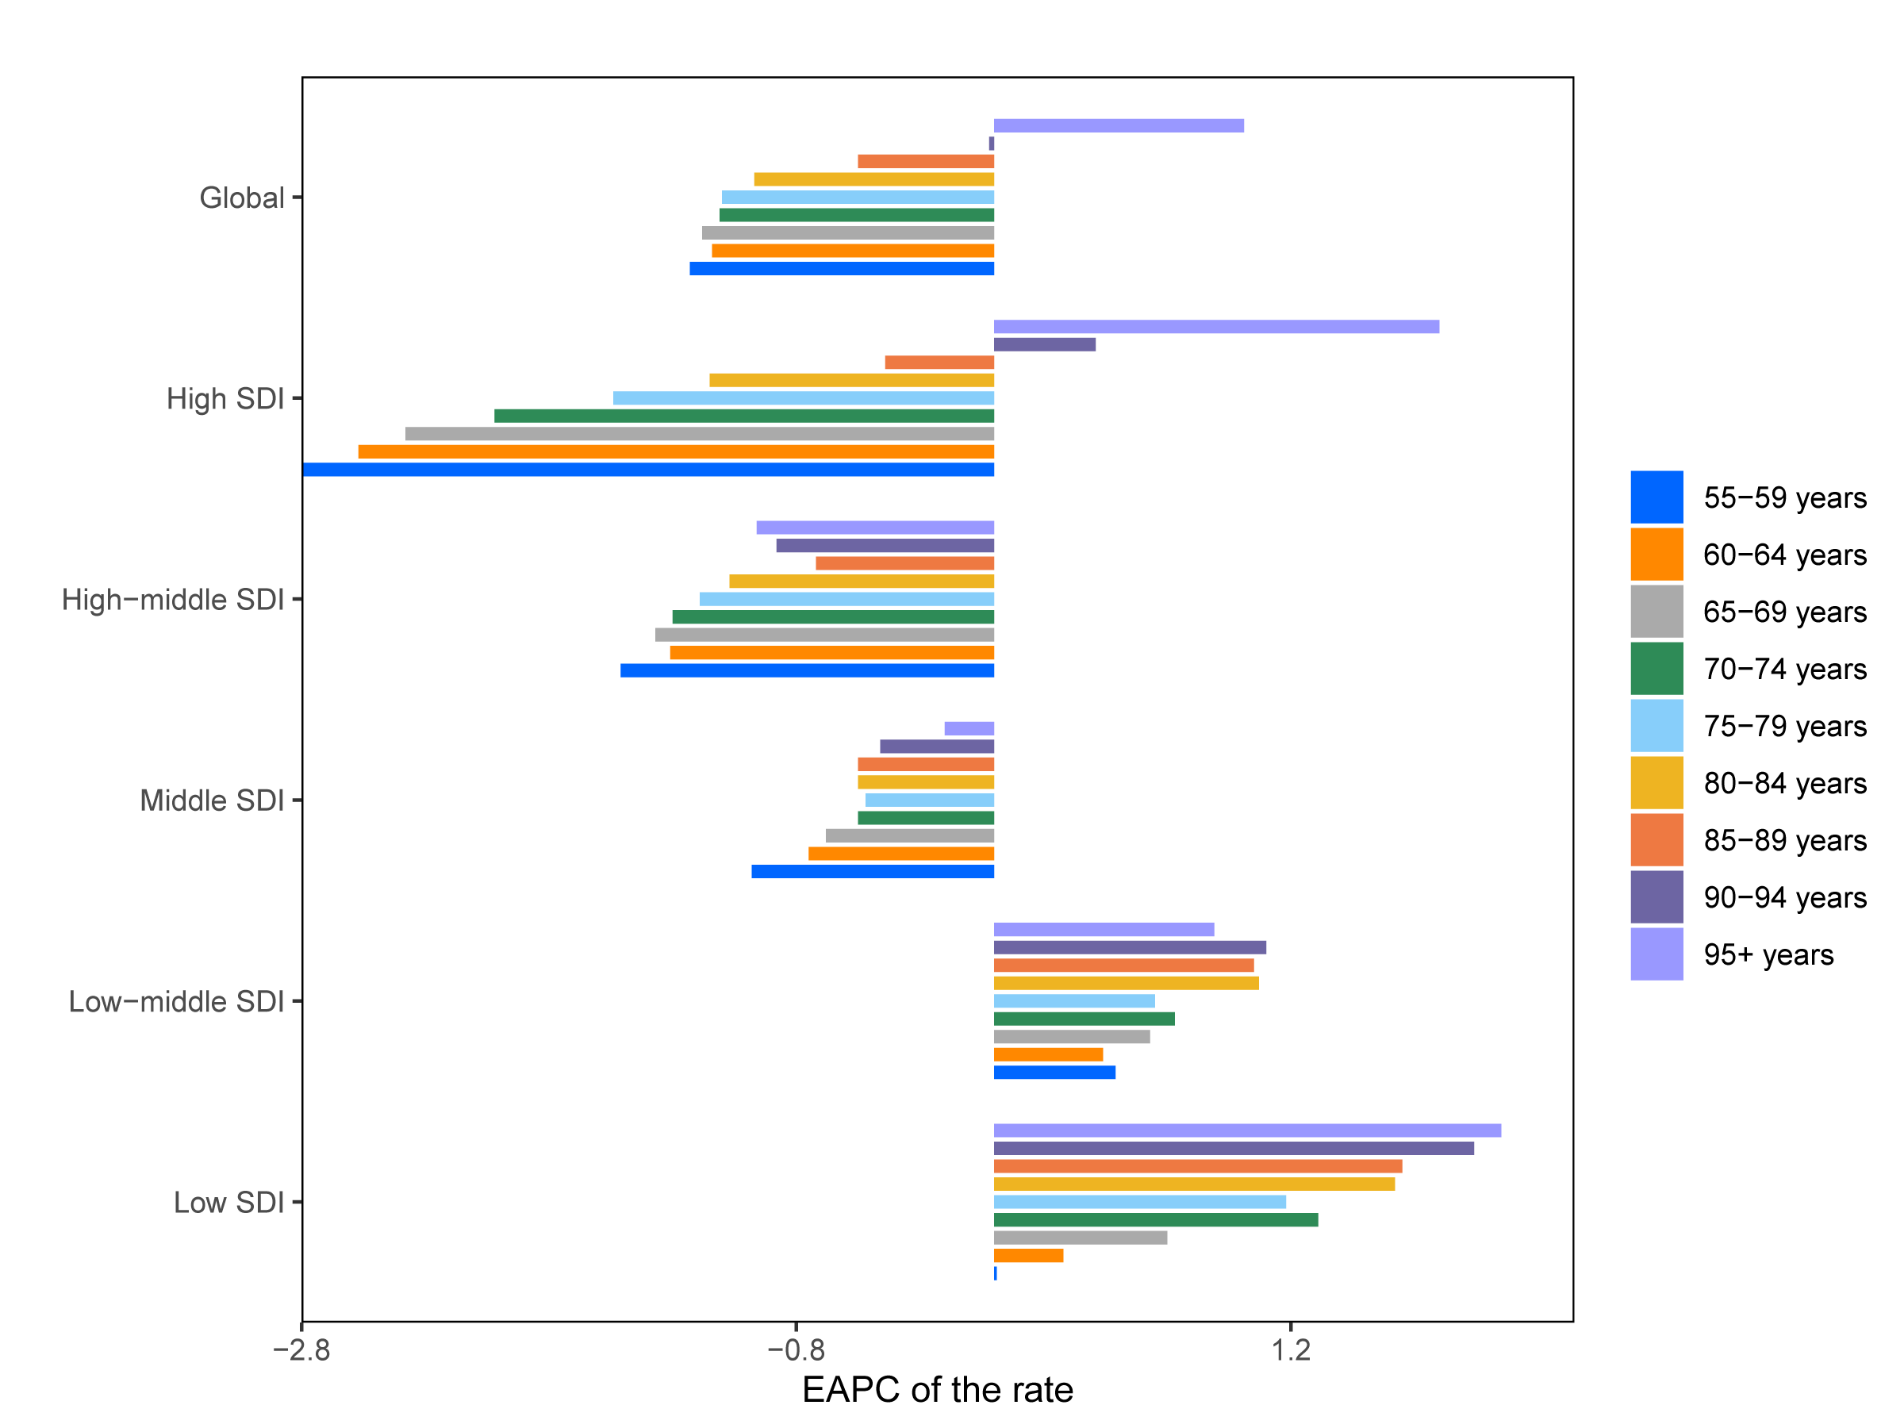


**Fig.S14** EAPC of incident rates of GBTC burden aged 55 years and above across 9 age groups globally and in 5 territories from 1990 to 2021.


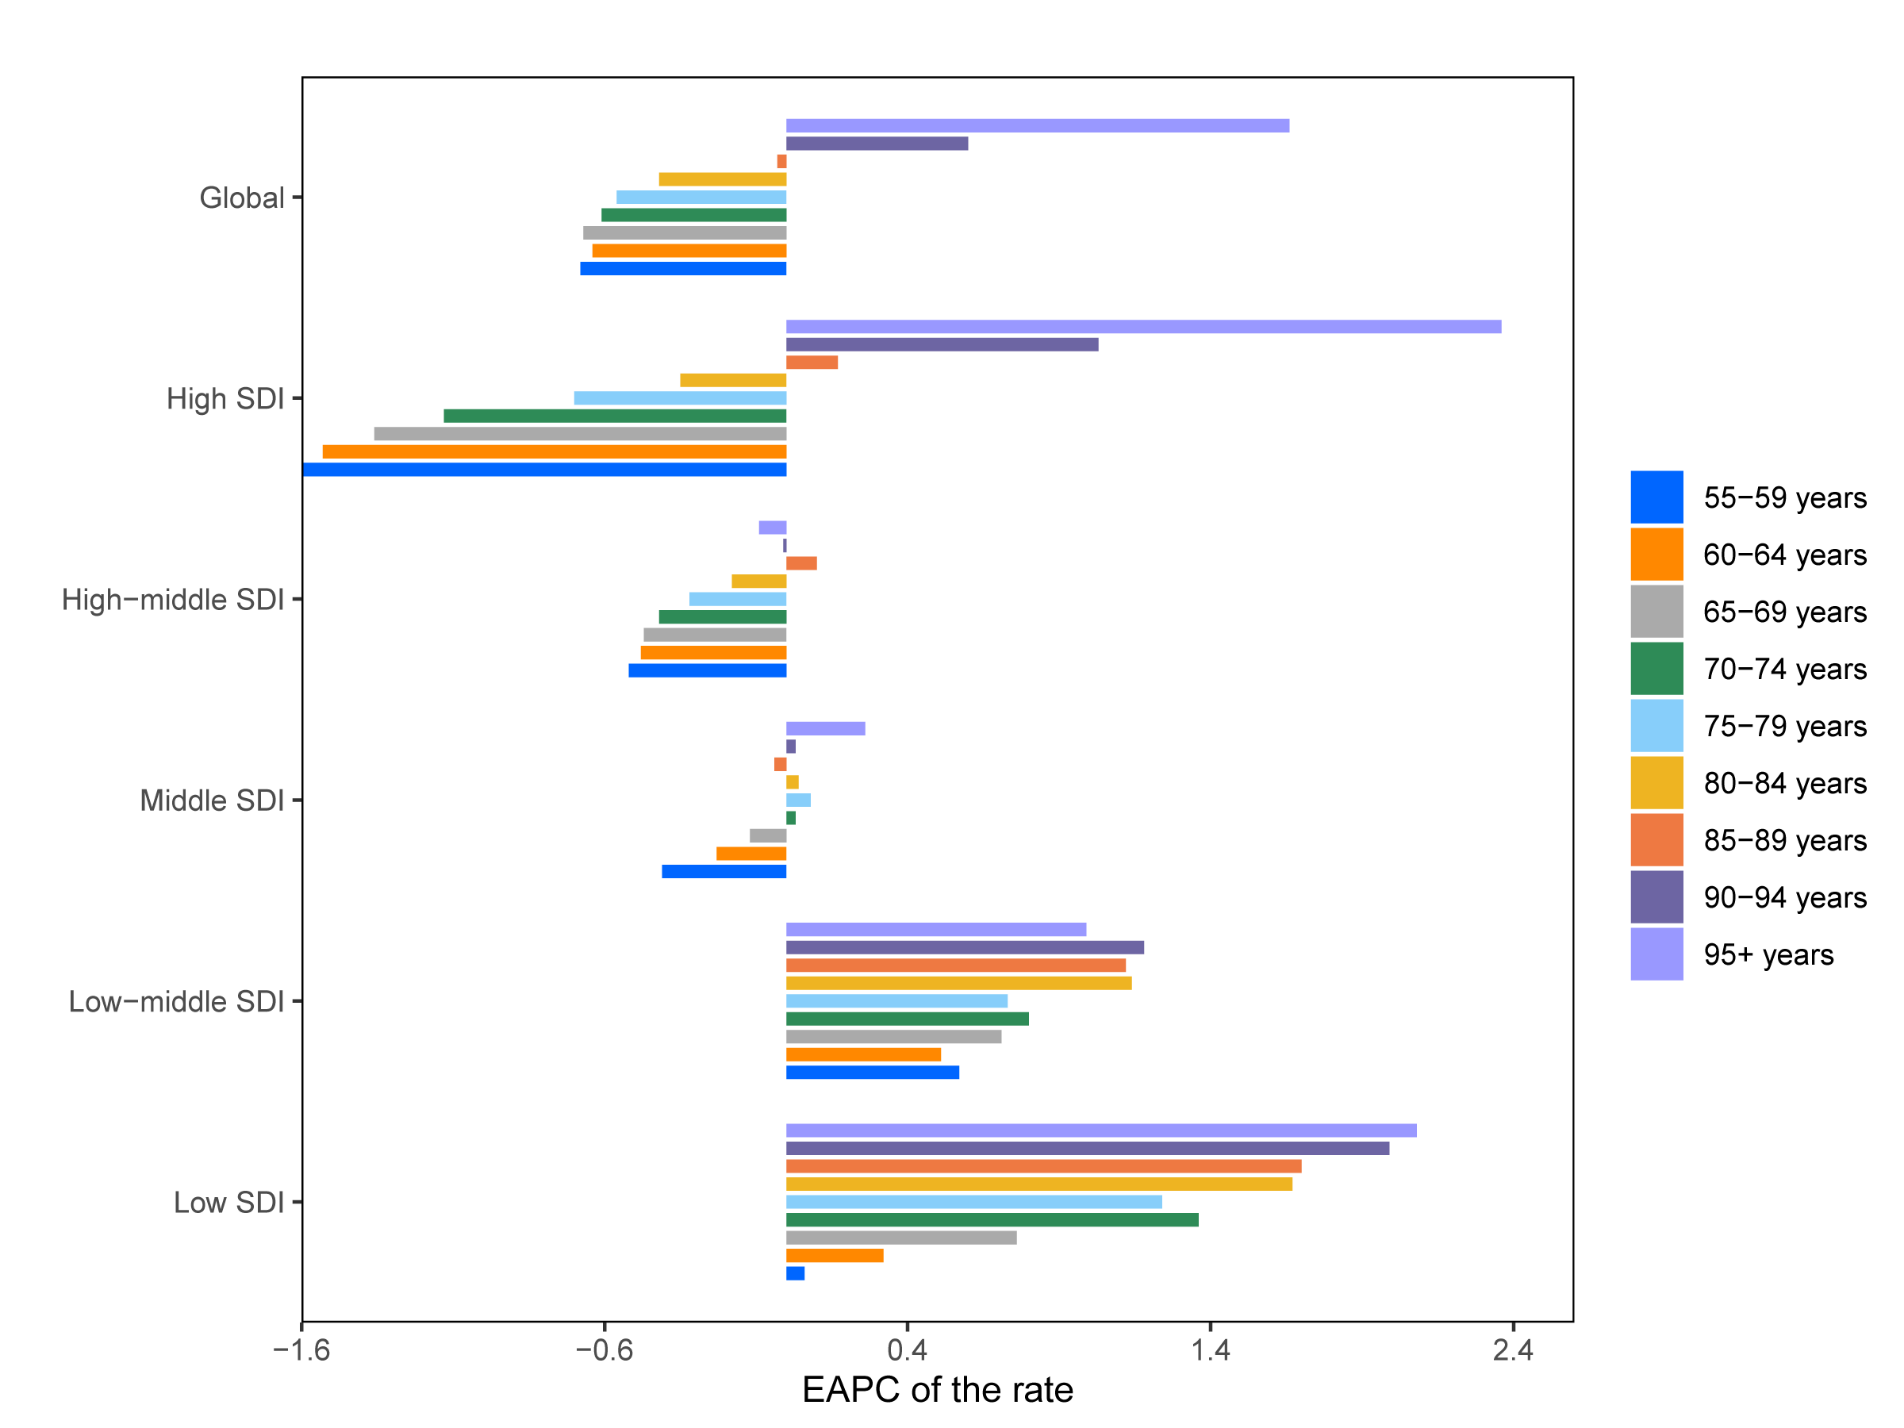


**Fig.S15** EAPC of DALYs rates of GBTC burden aged 55 years and above across 9 age groups globally and in 5 territories from 1990 to 2021.
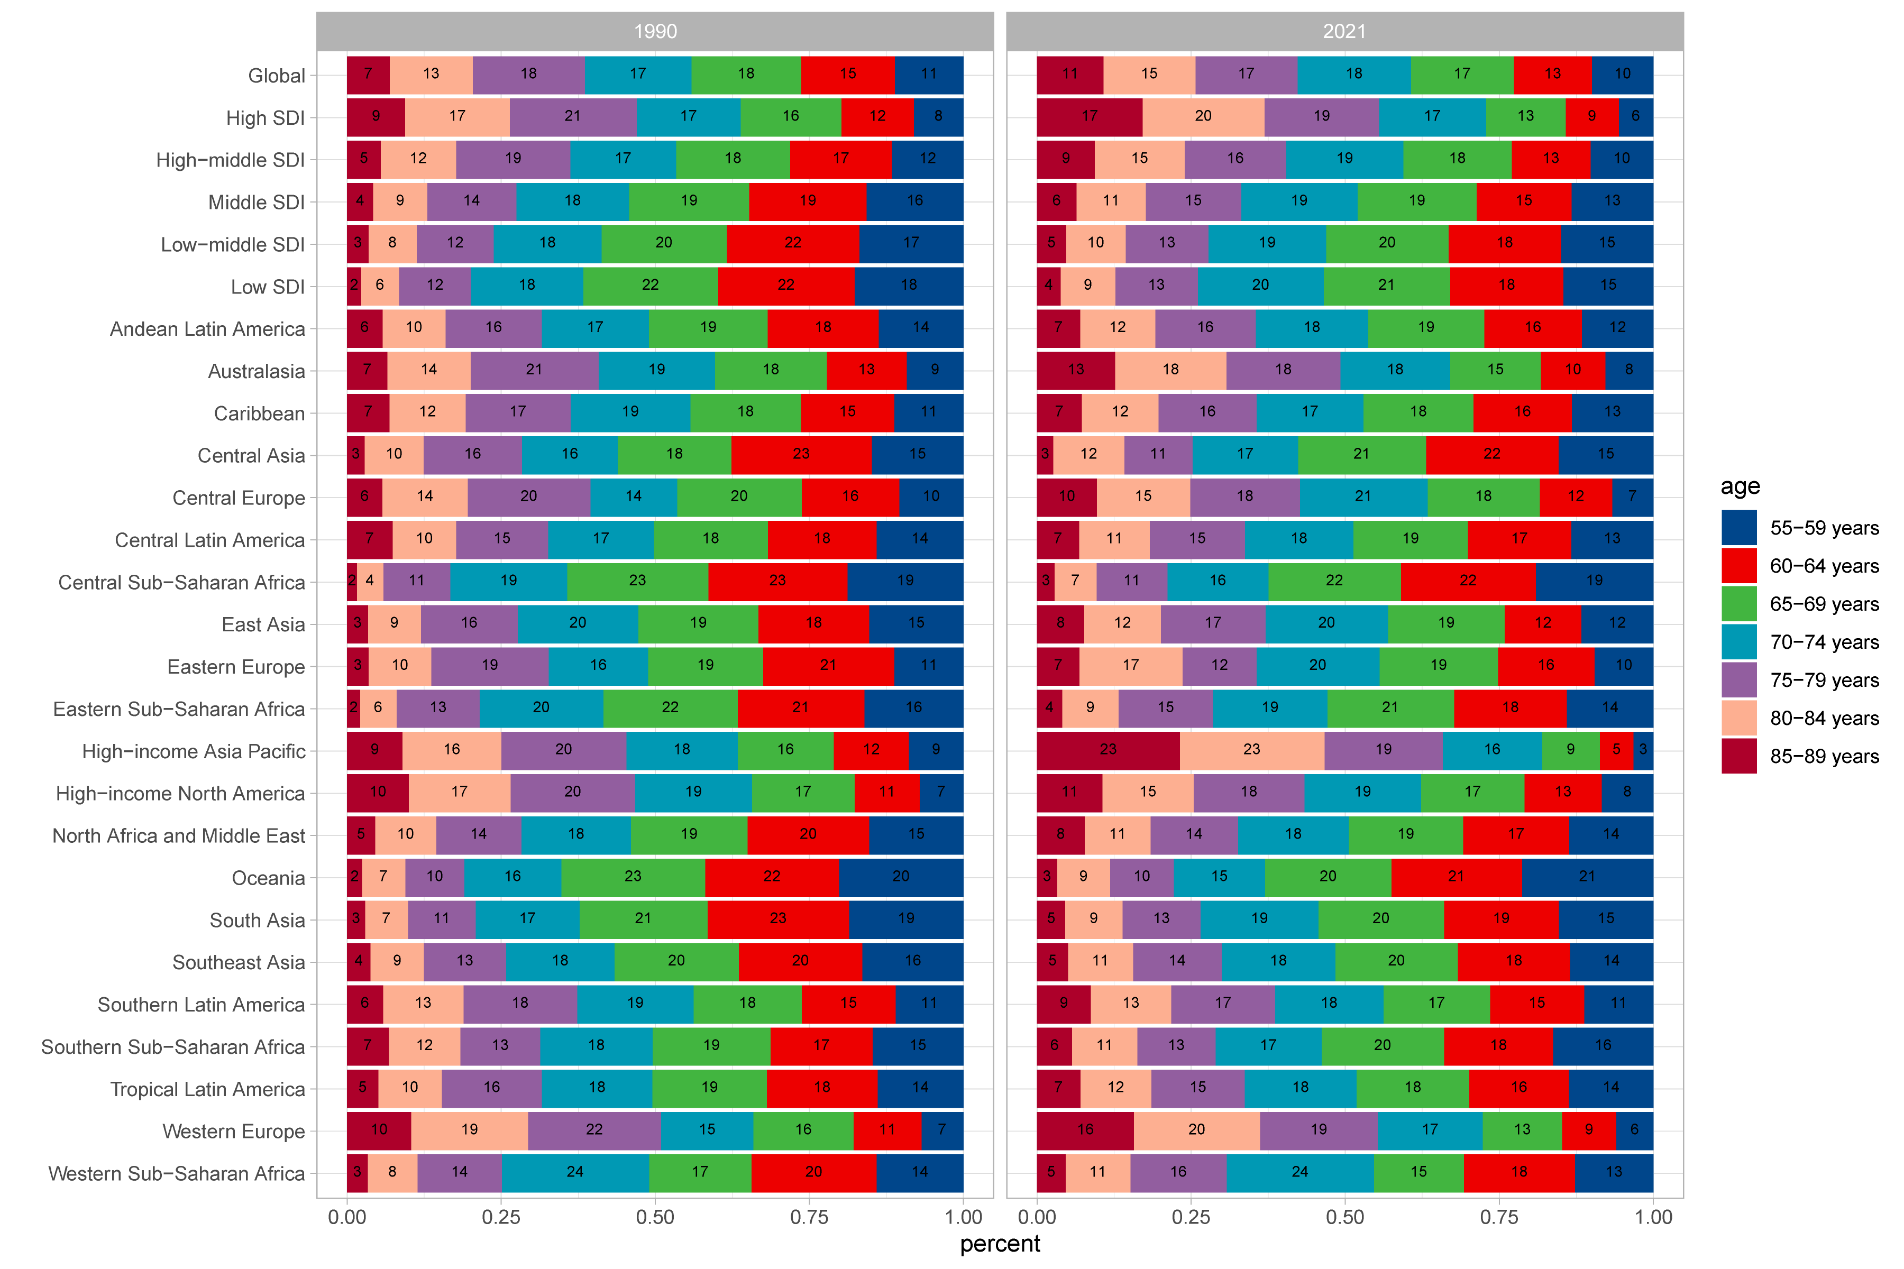


**Fig.S16** The distribution of incident cases of GBTC burden aged 55 years and above across 7 age groups as percentages globally, in 5 territories, and 21 GBD regions in 1990 and 2021.


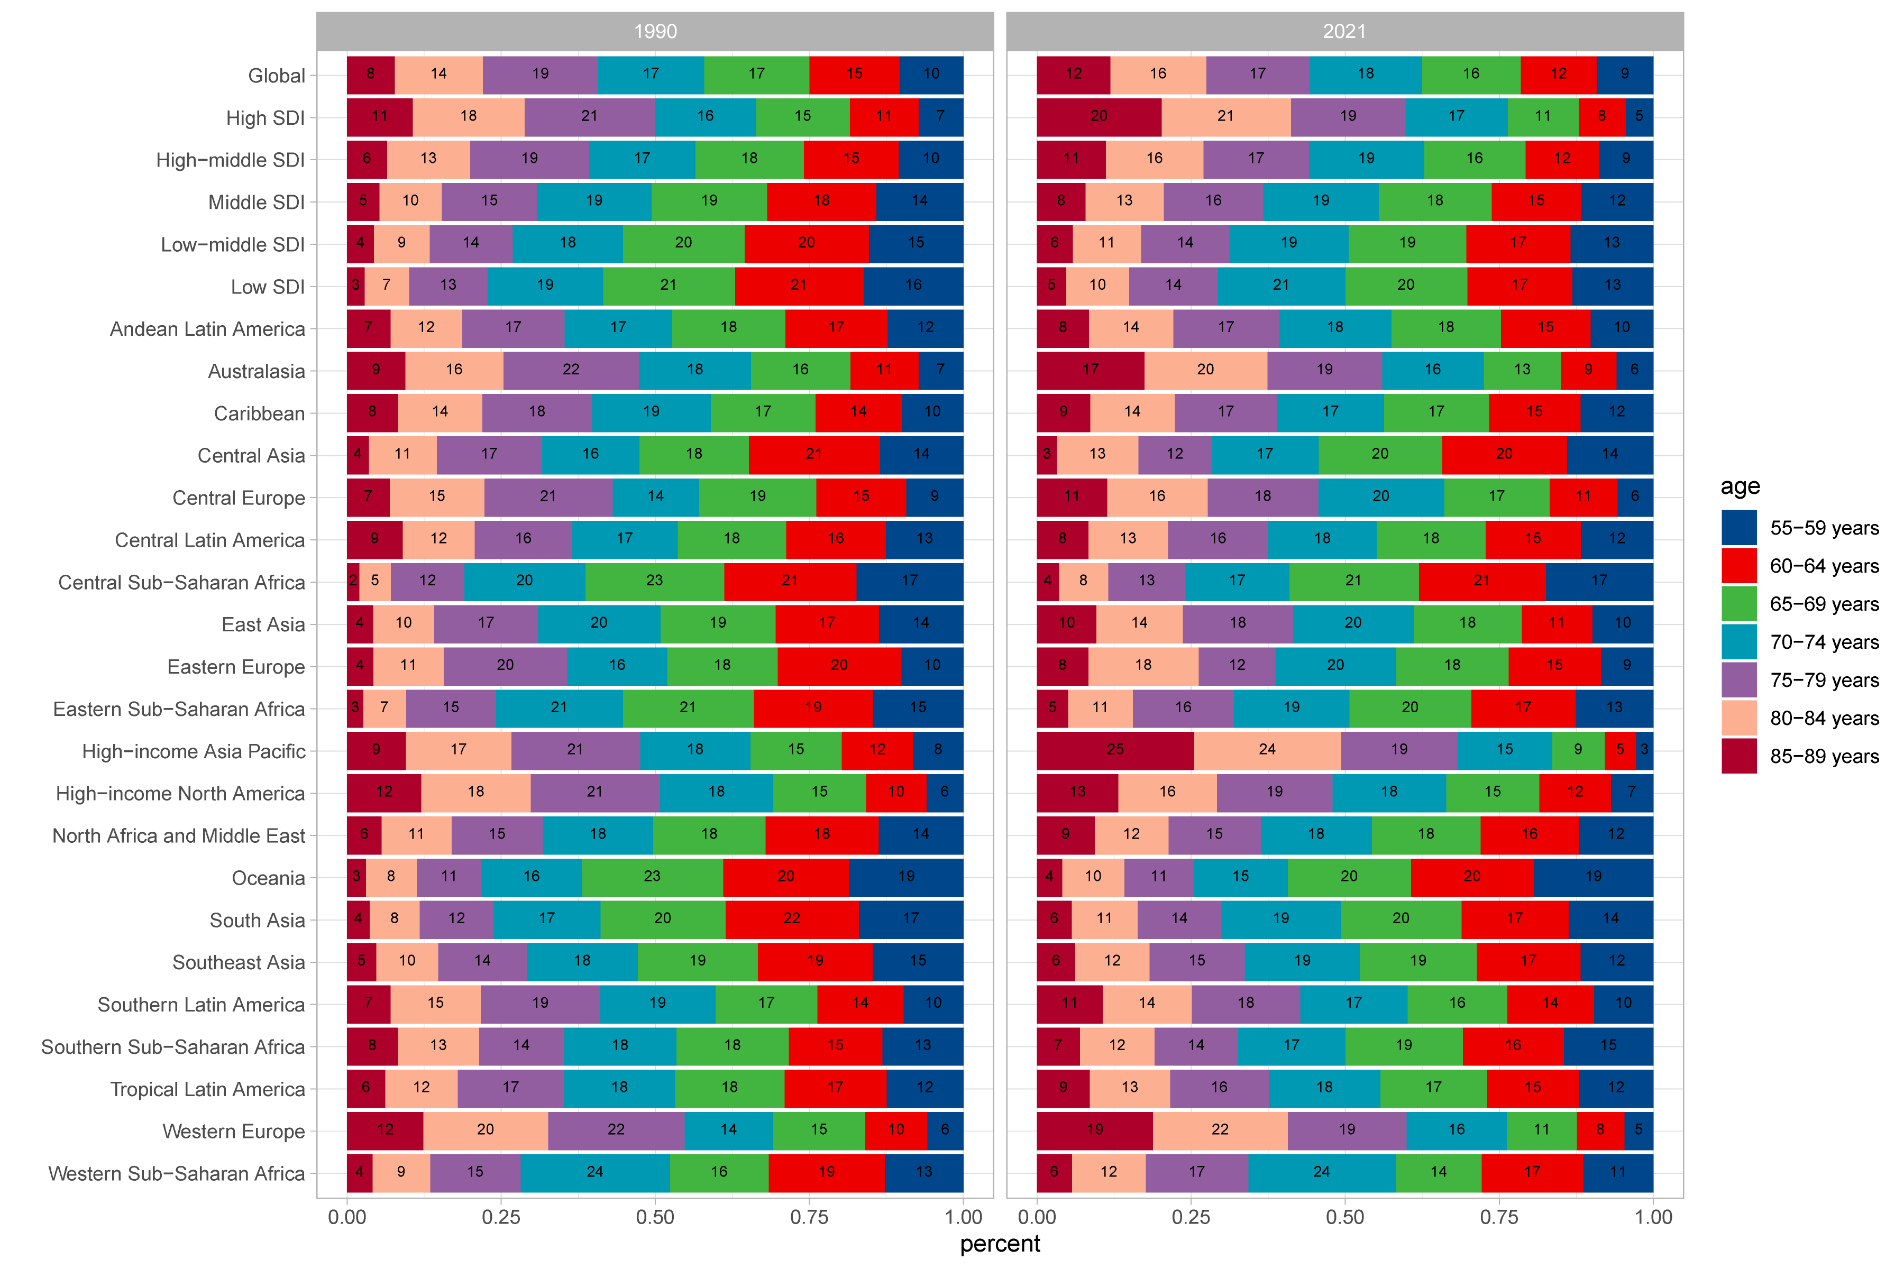


**Fig.S17** The distribution of death cases of GBTC burden aged 55 years and above across 7 age groups as percentages globally, in 5 territories, and 21 GBD regions in 1990 and 2021.


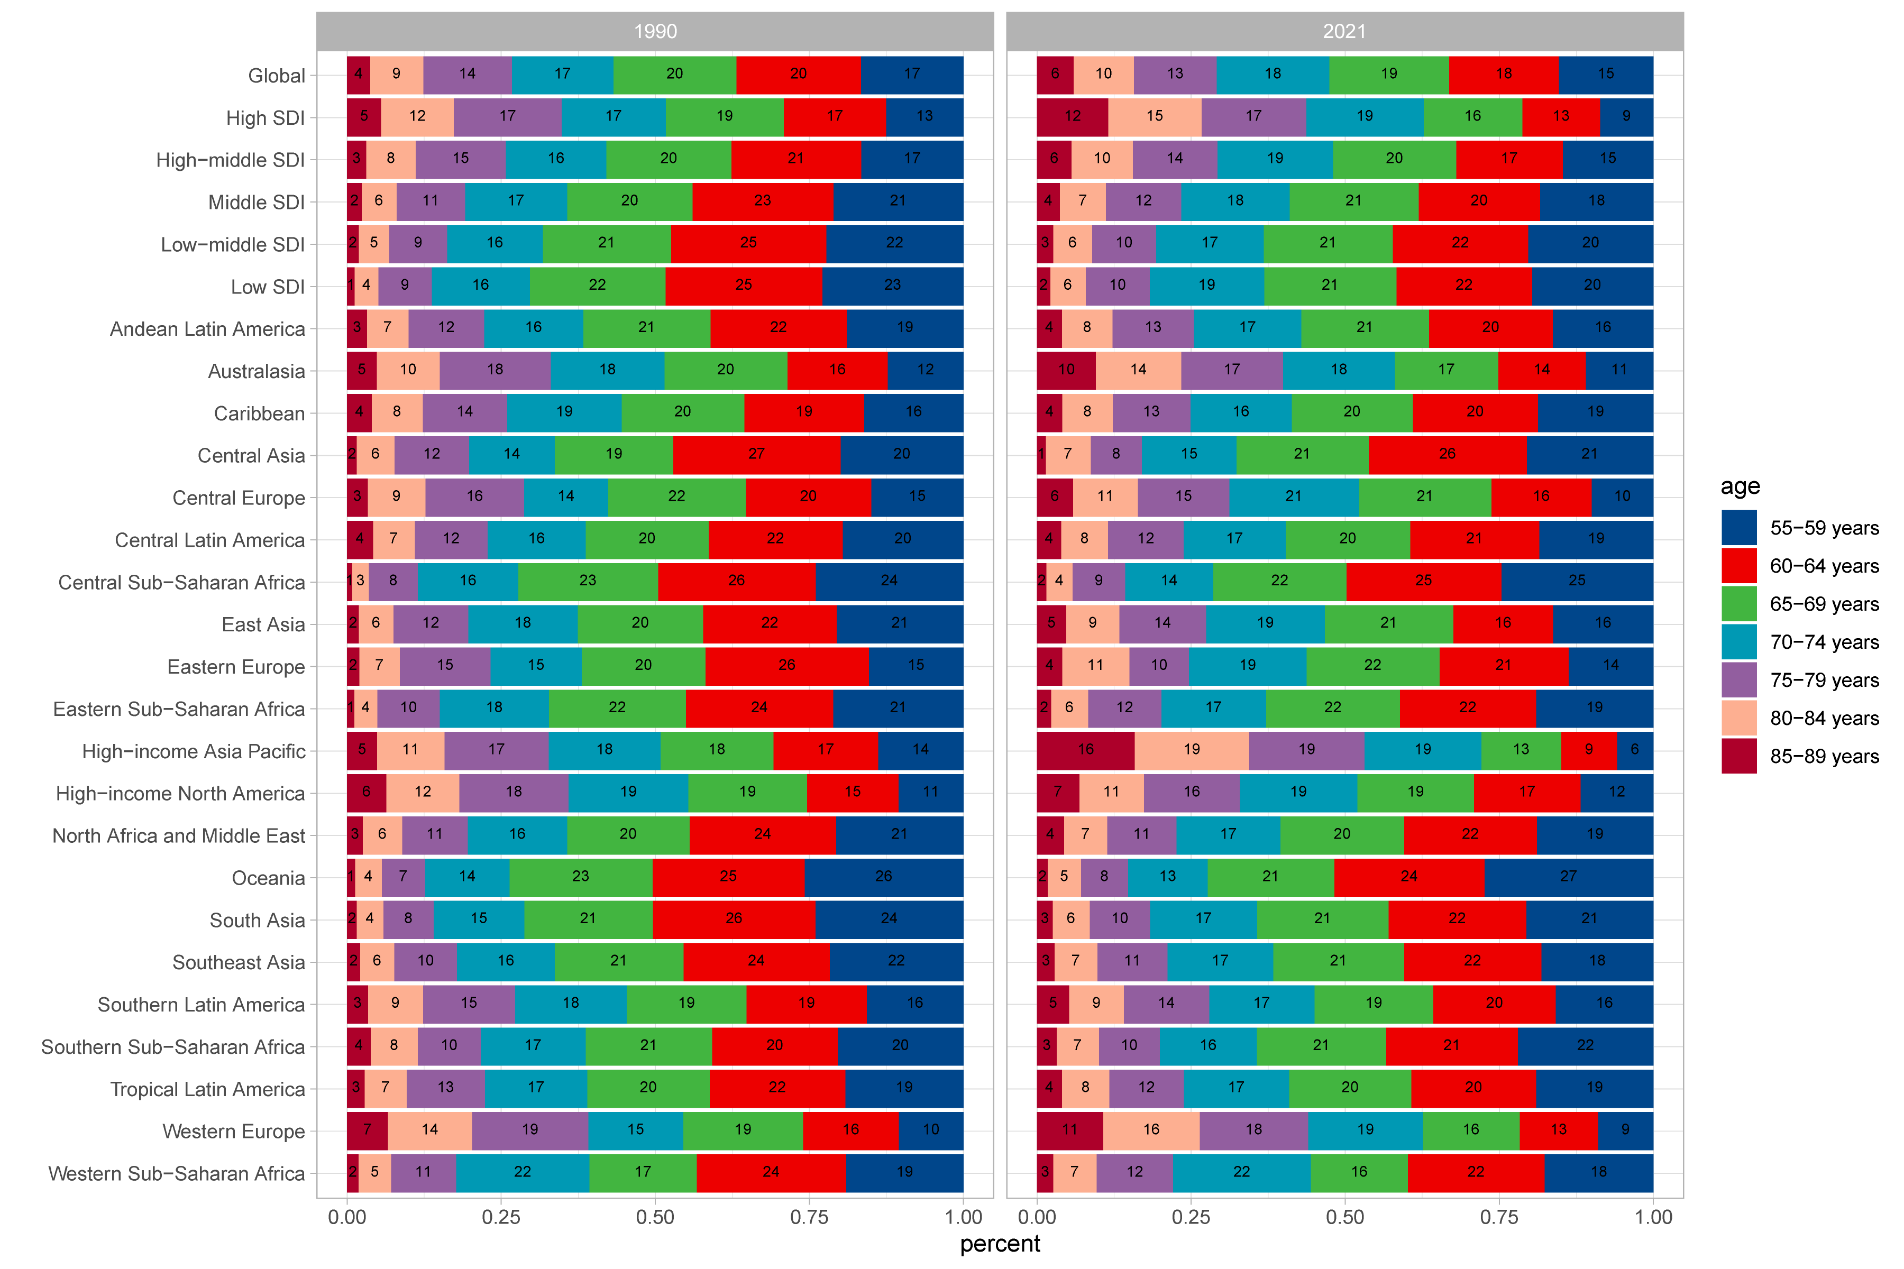


**Fig.S18** The distribution of DALY cases of GBTC burden aged 55 years and above across 7 age groups as percentages globally, in 5 territories, and 21 GBD regions in 1990 and 2021.


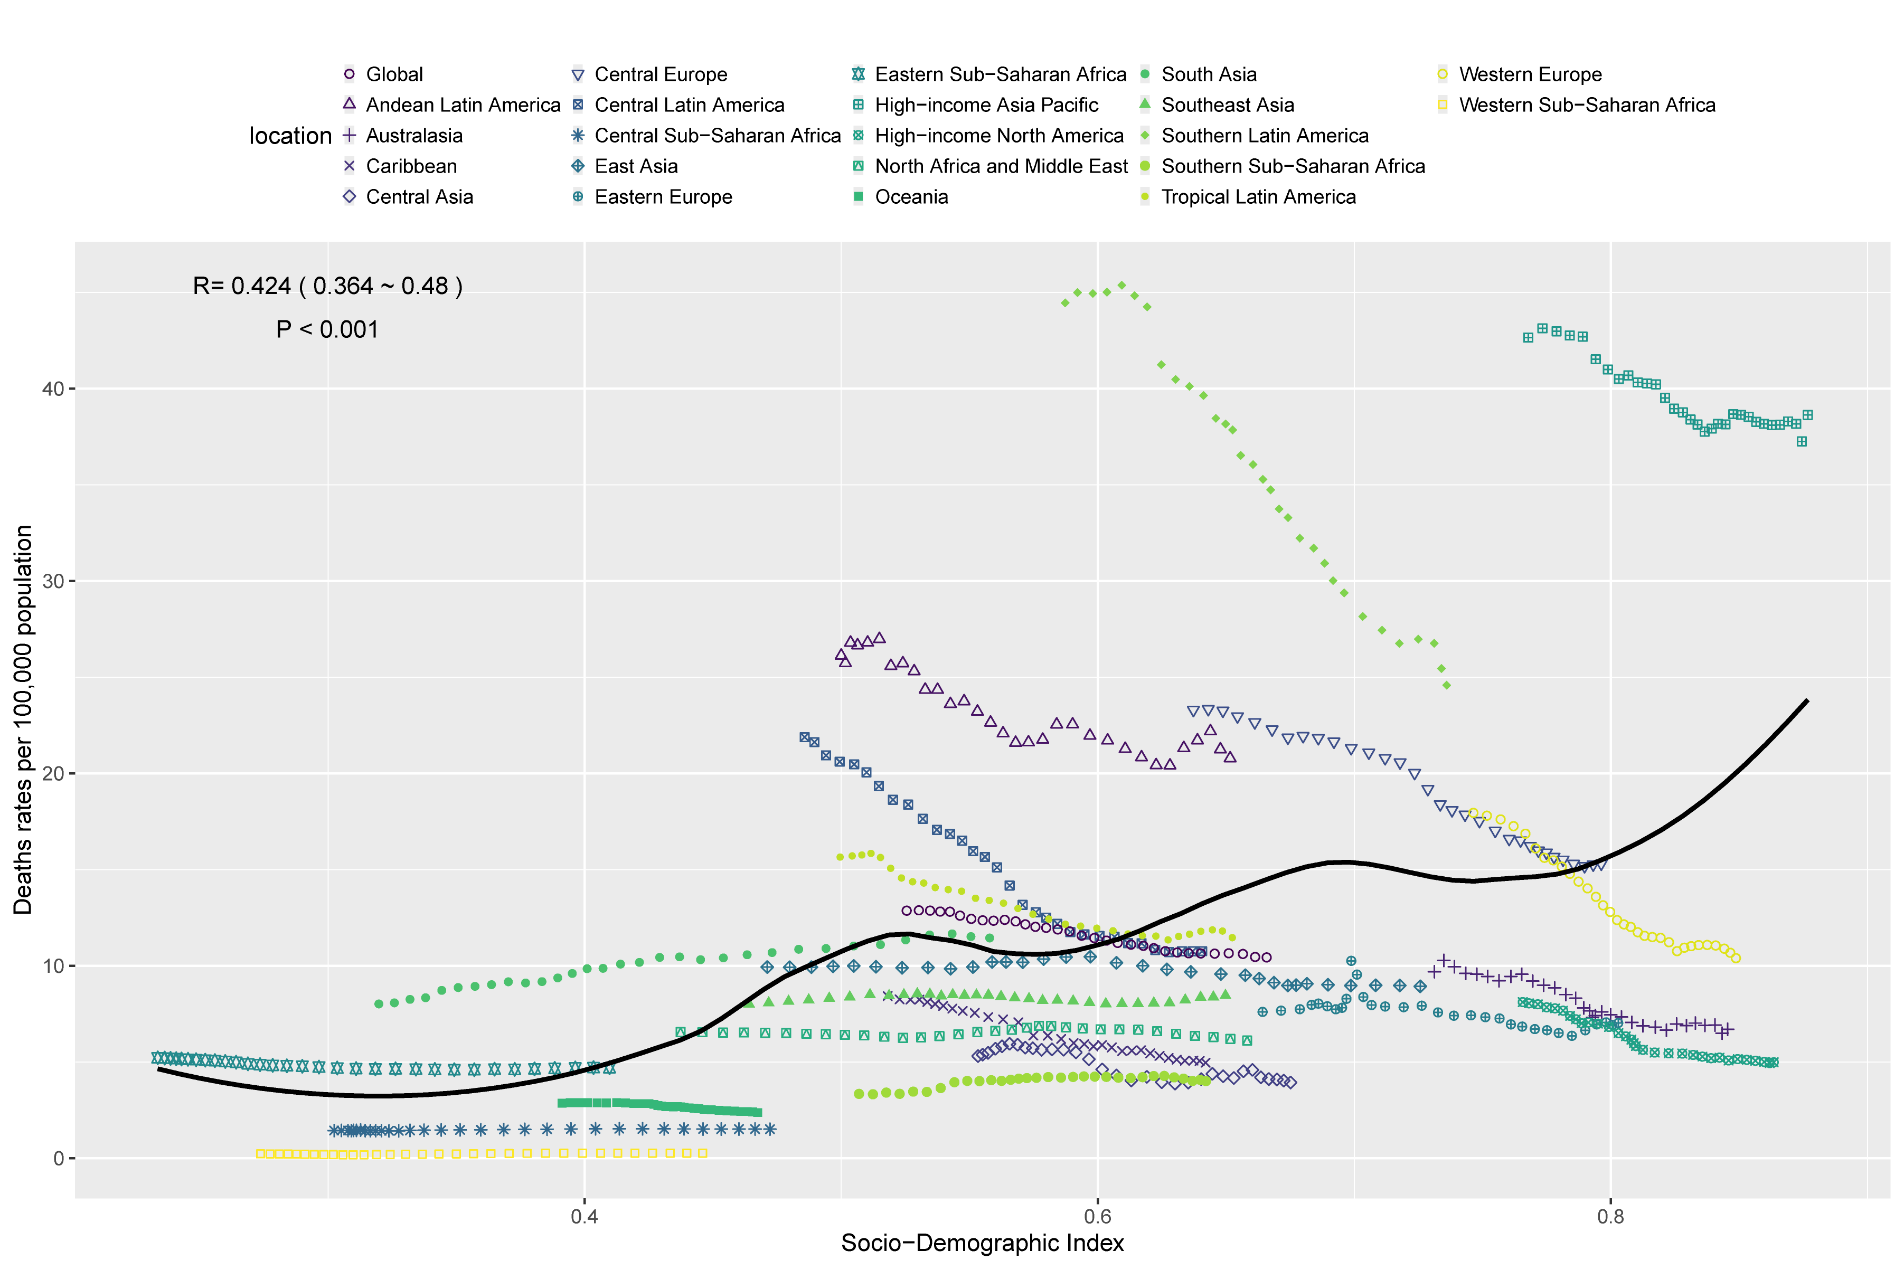


**Fig.S19** The associations between the SDI and death rates per 100,000 population of GBTC aged 55 years and above across 21 GBD regions.


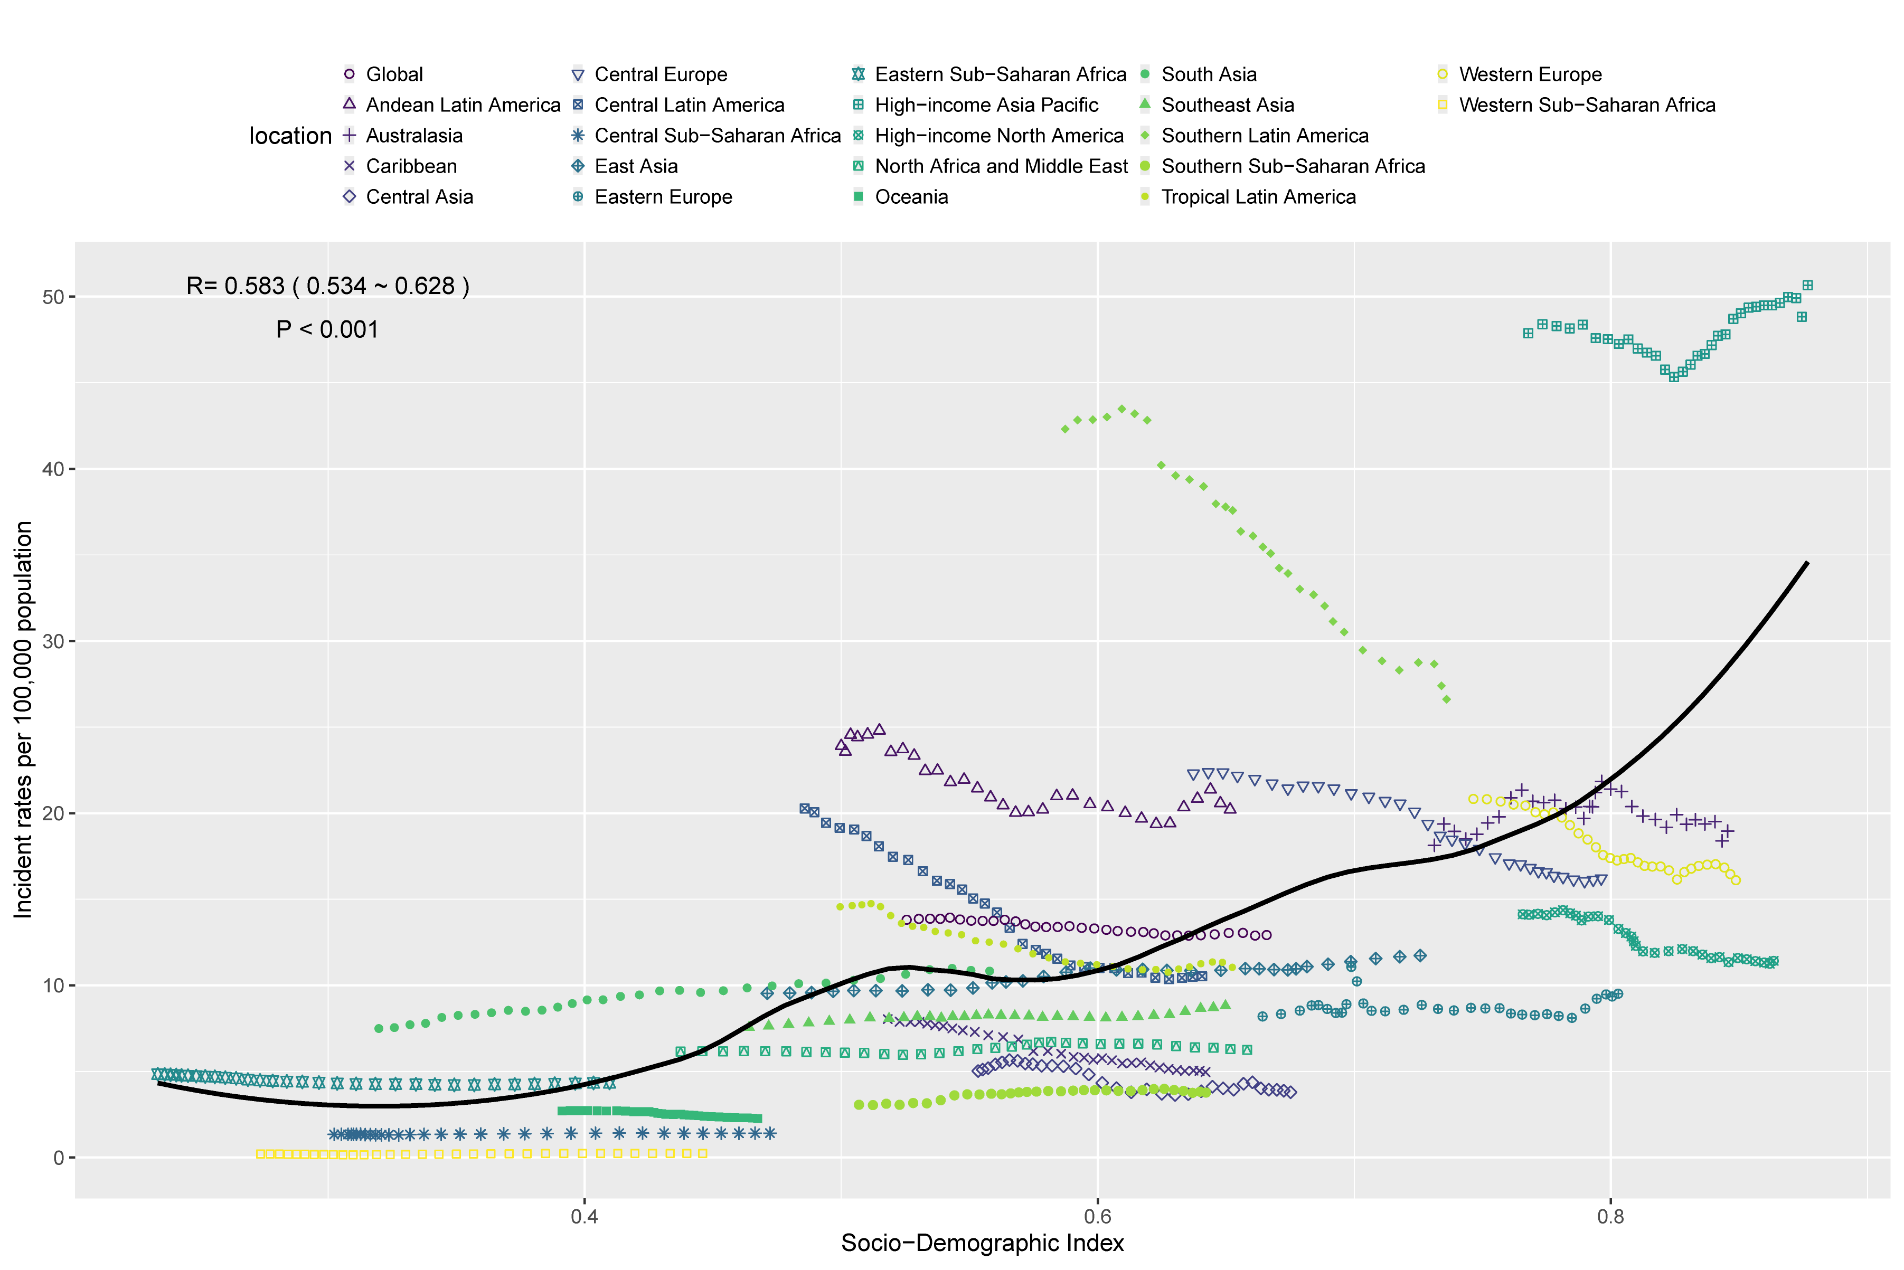


**Fig.S20** The associations between the SDI and incident rates per 100,000 population of GBTC aged 55 years and above across 21 GBD regions.


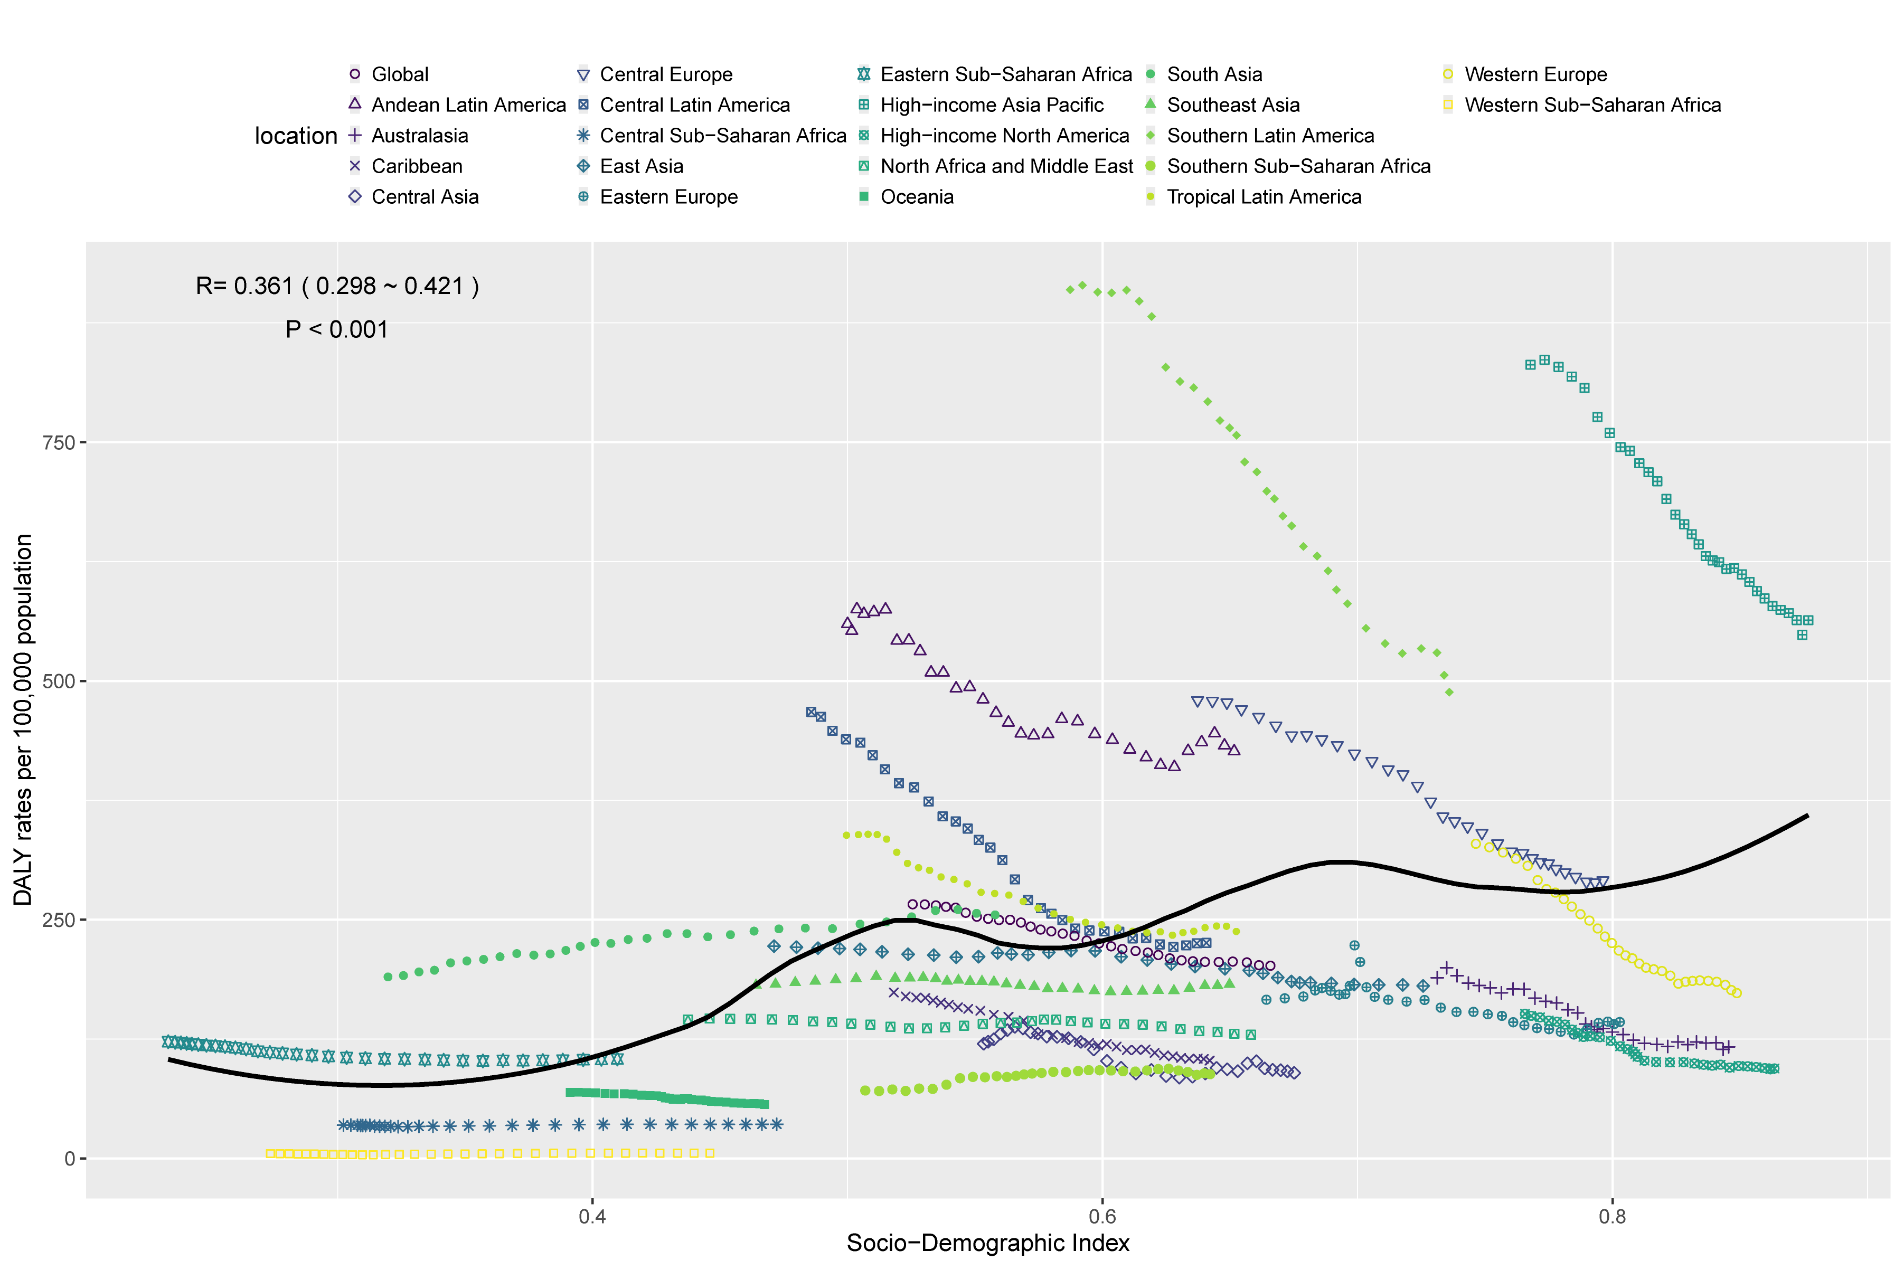


**Fig.S21** The associations between the SDI and DALYs rates per 100,000 population of GBTC aged 55 years and above across 21 GBD regions.
