# Supplementary material for: Global, Regional, and National Burden of Gallbladder and Biliary Tract Cancer in Adults Aged 55 Years and Older: Analysis of the Global Burden of Disease 1990–2021
Source: Research Square preprint supplement (doi:10.21203/rs.3.rs-7839914/v1), 2025-11-20
Supplement: Supplementary file 2 [file 3e742639e39f71d789f13b42.docx]

**Table 1** The prevalence of GBTC cases and rates aged 55 years and above in 1990 and 2021, and the trends from 1990 to 2021

| **location** | **Prevalent cases** |  |  |  | **Prevalent rates** |  |  |
| --- | --- | --- | --- | --- | --- | --- | --- |
| **1990_number(95%UI)** | **2021_number(95%UI)** | **Percentage change (100%)** |  | **1990_per 100000(95%UI)** | **2021_per 100000(95%UI)** | **EAPC (95%CI)** |
| Andean Latin America | 768.02 (585.98-908.81) | 2083.67 (1585.74-2712.38) | 1.71 |  | 22.89 (17.46-27.08) | 21.03 (16.01-27.38) | -0.47 (-0.64--0.3) |
| Australasia | 1412.16 (1330.18-1493.27) | 4343.59 (3793.17-4725.24) | 2.08 |  | 35.85 (33.77-37.9) | 49.17 (42.94-53.49) | 1 (0.67-1.34) |
| Caribbean | 346.64 (307.85-378.61) | 494.19 (431.72-558.1) | 0.43 |  | 8.04 (7.14-8.79) | 5.34 (4.66-6.03) | -1.54 (-1.66--1.42) |
| Central Asia | 395.18 (350.83-459.86) | 557.78 (494.3-631.84) | 0.41 |  | 4.94 (4.39-5.75) | 3.83 (3.4-4.34) | -1.3 (-1.67--0.92) |
| Central Europe | 5870.26 (5492.65-6134.77) | 6949.12 (6265.27-7643.44) | 0.18 |  | 22.13 (20.71-23.13) | 18.77 (16.92-20.64) | -0.76 (-0.85--0.68) |
| Central Latin America | 2674.01 (2580.55-2740.53) | 4729.64 (4225.94-5252.39) | 0.77 |  | 19.71 (19.02-20.2) | 11.06 (9.88-12.28) | -2.26 (-2.44--2.07) |
| Central Sub-Saharan Africa | 48.25 (33.49-69.9) | 123.91 (83.68-175.18) | 1.57 |  | 1.28 (0.89-1.86) | 1.37 (0.93-1.94) | 0.32 (0.24-0.39) |
| East Asia | 14267.77 (11181.9-18341.66) | 67284.29 (46104.28-87117.93) | 3.72 |  | 9.58 (7.51-12.31) | 17.16 (11.76-22.22) | 2.05 (1.95-2.15) |
| Eastern Europe | 4539.87 (4266.41-4868.25) | 8718.76 (8055.2-9396.46) | 0.92 |  | 9.29 (8.73-9.96) | 14.04 (12.98-15.14) | 1 (0.71-1.29) |
| Eastern Sub-Saharan Africa | 548.08 (375.46-741.01) | 1119.1 (790.45-1478.89) | 1.04 |  | 4.51 (3.09-6.09) | 4.14 (2.92-5.47) | -0.38 (-0.46--0.3) |
| Global | 108614.75 (99075.75-116782.93) | 271324.43 (232609.19-304022.71) | 1.5 |  | 16.18 (14.76-17.39) | 18.26 (15.65-20.46) | 0.38 (0.34-0.41) |
| High-income Asia Pacific | 20215.82 (18613.12-21288.44) | 50619.94 (42563.16-56968.72) | 1.5 |  | 57.81 (53.23-60.88) | 71.8 (60.37-80.8) | 0.79 (0.68-0.91) |
| High-income North America | 14946.74 (13849.43-15532.48) | 29278.78 (26520.1-30813.3) | 0.96 |  | 25.8 (23.91-26.81) | 26.02 (23.57-27.38) | -0.18 (-0.29--0.07) |
| High-middle SDI | 25750.55 (22817.27-27449.02) | 68500.55 (52534.59-79534.39) | 1.66 |  | 14.93 (13.23-15.91) | 19.76 (15.15-22.94) | 0.88 (0.83-0.93) |
| High SDI | 59059.87 (55510.54-61404.15) | 123160.57 (109214.56-134051.48) | 1.09 |  | 31.67 (29.77-32.93) | 35.7 (31.66-38.85) | 0.35 (0.3-0.41) |
| Low-middle SDI | 6644.45 (5685.37-9516.16) | 20779.86 (16361.45-25872.28) | 2.13 |  | 6.59 (5.64-9.44) | 8.62 (6.79-10.73) | 0.93 (0.88-0.97) |
| Low SDI | 1653.14 (1316.08-2294.21) | 4742.9 (3260.24-5836.45) | 1.87 |  | 4.43 (3.53-6.15) | 5.78 (3.97-7.11) | 0.96 (0.91-1.01) |
| Middle SDI | 15373.17 (13462.71-19744.55) | 53962.26 (43414.81-71544.34) | 2.51 |  | 8.86 (7.76-11.38) | 11.48 (9.24-15.23) | 0.78 (0.66-0.9) |
| North Africa and Middle East | 1701.04 (1381.69-2239.28) | 5234.21 (3826.1-6493.05) | 2.08 |  | 6.02 (4.89-7.92) | 6.87 (5.02-8.52) | 0.6 (0.49-0.7) |
| Oceania | 12.75 (7.81-16.65) | 27.9 (19.06-35.7) | 1.19 |  | 2.65 (1.62-3.46) | 2.26 (1.54-2.89) | -0.56 (-0.59--0.53) |
| South Asia | 6834 (5578.14-9830.78) | 26642.51 (18586.17-31608.37) | 2.9 |  | 7.2 (5.88-10.35) | 10.73 (7.49-12.73) | 1.31 (1.26-1.36) |
| Southeast Asia | 3178.93 (2327.45-4027.65) | 11507.47 (8105.49-14737.47) | 2.62 |  | 7.51 (5.5-9.51) | 10.05 (7.08-12.87) | 0.78 (0.72-0.84) |
| Southern Latin America | 3335.57 (3167.09-3481.85) | 4620.96 (4231.79-4920.82) | 0.39 |  | 42.11 (39.98-43.95) | 31.4 (28.76-33.44) | -1.07 (-1.15--0.99) |
| Southern Sub-Saharan Africa | 129.72 (93.67-174.83) | 356.58 (248.78-420.74) | 1.75 |  | 2.93 (2.12-3.95) | 3.66 (2.56-4.32) | 0.83 (0.68-0.97) |
| Tropical Latin America | 2141.2 (2018.14-2222.79) | 5054.32 (4648.97-5298.67) | 1.36 |  | 14.14 (13.33-14.68) | 11.41 (10.49-11.96) | -0.9 (-1.05--0.75) |
| Western Europe | 25220.36 (23618.75-26248.05) | 41504.94 (36761.26-44580.69) | 0.65 |  | 25.97 (24.32-27.03) | 27.83 (24.65-29.89) | 0.28 (0.18-0.37) |
| Western Sub-Saharan Africa | 28.38 (23.09-39.94) | 72.78 (50.05-89.34) | 1.56 |  | 0.2 (0.16-0.28) | 0.23 (0.16-0.28) | 1.06 (0.7-1.43) |

**Table 2** The prevalence of GBTC cases and rates aged 55 years and above in 1990 and 2021, and the trends in age patterns from 1990 to 2021

| **Location** | **Age**  **(years)** | **Prevalent cases** |  |  |  | **Prevalent rates** |  |  |
| --- | --- | --- | --- | --- | --- | --- | --- | --- |
| **1990_number(95%UI)** | **2021_number(95%UI)** | **Percentage_change(100%)** | **1990_per 100000(95%UI)** | **2021_per 100000(95%UI)** | **EAPC (95%CI)** |
| Global | 55+ | 108614.75 (99075.75-116782.93) | 271324.43 (232609.19-304022.71) | 1.5 (1.35-1.6) | 16.18 (14.76-17.39) | 18.26 (15.65-20.46) | 0.38 (0.34-0.41) |
|  | 55-59 | 13427.3 (11843.47-14887.55) | 29377.71 (23480.89-33978.73) | 1.19 (0.98-1.28) | 7.25 (6.39-8.04) | 7.42 (5.93-8.59) | 0.07 (0.01-0.13) |
|  | 60-64 | 17378.14 (15689.32-19049.51) | 34572.28 (28586.28-39141.68) | 0.99 (0.82-1.05) | 10.82 (9.77-11.86) | 10.8 (8.93-12.23) | 0.04 (-0.02-0.11) |
|  | 65-69 | 20003.79 (18351.51-21713.36) | 44921.98 (36705.99-51244.98) | 1.25 (1-1.36) | 16.18 (14.85-17.57) | 16.29 (13.31-18.58) | 0.05 (-0.04-0.13) |
|  | 70-74 | 18428.25 (16920.94-19910.77) | 47441.94 (39976.74-53255.5) | 1.57 (1.36-1.67) | 21.77 (19.99-23.52) | 23.05 (19.42-25.87) | 0.07 (0.01-0.13) |
|  | 75-79 | 18398.96 (16938.47-19451.45) | 41764.52 (36061.13-46540.27) | 1.27 (1.13-1.39) | 29.89 (27.52-31.6) | 31.67 (27.34-35.29) | 0.22 (0.17-0.28) |
|  | 80-84 | 13121.34 (11619.07-14040.34) | 37151.42 (31354.87-41329.94) | 1.83 (1.7-1.94) | 37.09 (32.84-39.69) | 42.42 (35.8-47.19) | 0.44 (0.36-0.53) |
|  | 85-89 | 5971.3 (5078.86-6500.01) | 23317.55 (18550.98-26590.4) | 2.9 (2.65-3.09) | 39.52 (33.61-43.01) | 51 (40.57-58.16) | 0.78 (0.66-0.89) |
|  | 90-94 | 1660.13 (1342.82-1834.16) | 10602.5 (7906-12369.42) | 5.39 (4.89-5.74) | 38.74 (31.34-42.8) | 59.27 (44.19-69.14) | 1.43 (1.36-1.49) |
|  | 95+ | 225.54 (170.42-256.42) | 2174.53 (1458.39-2635.14) | 8.64 (7.56-9.28) | 22.15 (16.74-25.19) | 39.9 (26.76-48.35) | 1.94 (1.84-2.03) |
| Low SDI | 55+ | 1653.14 (1316.08-2294.21) | 4742.9 (3260.24-5836.45) | 1.87 (1.48-1.54) | 4.43 (3.53-6.15) | 5.78 (3.97-7.11) | 0.96 (0.91-1.01) |
|  | 55-59 | 334.99 (248.31-465.14) | 804.48 (541.09-1031.98) | 1.4 (1.18-1.22) | 2.87 (2.12-3.98) | 3.18 (2.14-4.07) | 0.19 (0.08-0.3) |
|  | 60-64 | 398.31 (309.38-554.96) | 960.42 (660.8-1221.67) | 1.41 (1.14-1.2) | 4.27 (3.31-5.95) | 4.87 (3.35-6.2) | 0.45 (0.35-0.55) |
|  | 65-69 | 363.66 (279.25-502.17) | 998.8 (661.14-1243.33) | 1.75 (1.37-1.48) | 5.23 (4.02-7.22) | 6.62 (4.39-8.25) | 0.91 (0.83-0.99) |
|  | 70-74 | 280.35 (228.23-389.92) | 924.13 (635.97-1163.56) | 2.3 (1.79-1.98) | 5.93 (4.83-8.25) | 8.91 (6.13-11.22) | 1.53 (1.43-1.62) |
|  | 75-79 | 163.74 (129.04-228.31) | 556.98 (382.98-689.15) | 2.4 (1.97-2.02) | 6.04 (4.76-8.42) | 8.67 (5.96-10.73) | 1.43 (1.33-1.53) |
|  | 80-84 | 79.86 (63.65-114.09) | 337.32 (230.49-414.3) | 3.22 (2.62-2.63) | 6.15 (4.9-8.78) | 10 (6.83-12.28) | 1.87 (1.62-2.11) |
|  | 85-89 | 26.35 (20.13-37.72) | 129.46 (86.08-163.07) | 3.91 (3.28-3.32) | 5.78 (4.42-8.28) | 9.7 (6.45-12.22) | 1.85 (1.54-2.15) |
|  | 90-94 | 5.23 (3.77-7.8) | 28.29 (19.27-37.15) | 4.41 (4.11-3.76) | 4.63 (3.33-6.9) | 7.89 (5.37-10.36) | 2.07 (1.74-2.4) |
|  | 95+ | 0.65 (0.45-1.02) | 3.03 (1.91-4.16) | 3.66 (3.24-3.08) | 2.71 (1.87-4.25) | 3.98 (2.51-5.47) | 2.1 (1.72-2.48) |
| Low-middle SDI | 55+ | 6644.45 (5685.37-9516.16) | 20779.86 (16361.45-25872.28) | 2.13 (1.88-1.72) | 6.59 (5.64-9.44) | 8.62 (6.79-10.73) | 0.93 (0.88-0.97) |
|  | 55-59 | 1291.6 (1064.96-1853.15) | 3614.43 (2718.4-4539.14) | 1.8 (1.55-1.45) | 4.15 (3.42-5.96) | 5.2 (3.91-6.53) | 0.7 (0.63-0.78) |
|  | 60-64 | 1558.29 (1303.76-2191.22) | 4150.42 (3207.54-5027.28) | 1.66 (1.46-1.29) | 6.16 (5.15-8.66) | 7.26 (5.61-8.79) | 0.64 (0.57-0.7) |
|  | 65-69 | 1366.25 (1146.35-1932.28) | 4226.48 (3309.89-5338.17) | 2.09 (1.89-1.76) | 7.52 (6.31-10.63) | 9.53 (7.46-12.03) | 0.86 (0.79-0.92) |
|  | 70-74 | 1091.61 (902.08-1584.64) | 3766.4 (2961.06-4673.96) | 2.45 (2.28-1.95) | 8.88 (7.34-12.9) | 11.98 (9.42-14.86) | 0.95 (0.86-1.04) |
|  | 75-79 | 714.79 (608.67-999.97) | 2451.23 (1994.32-3165) | 2.43 (2.28-2.17) | 9.43 (8.03-13.19) | 12.21 (9.93-15.76) | 0.91 (0.85-0.97) |
|  | 80-84 | 410.54 (340.51-569.77) | 1628.49 (1284.51-2054.17) | 2.97 (2.77-2.61) | 9.86 (8.18-13.69) | 14.16 (11.17-17.86) | 1.31 (1.21-1.42) |
|  | 85-89 | 165.33 (135.67-231.67) | 702.67 (548.71-903.89) | 3.25 (3.04-2.9) | 10 (8.2-14.01) | 14.06 (10.98-18.09) | 1.26 (1.15-1.38) |
|  | 90-94 | 39.95 (31.6-55.96) | 205.4 (159.67-272.5) | 4.14 (4.05-3.87) | 9.05 (7.16-12.68) | 12.69 (9.87-16.84) | 1.29 (1.14-1.43) |
|  | 95+ | 6.07 (4.54-8.43) | 34.32 (24.77-43.83) | 4.65 (4.46-4.2) | 6.01 (4.5-8.35) | 7.57 (5.46-9.67) | 1.04 (0.87-1.21) |
| Middle SDI | 55+ | 15373.17 (13462.71-19744.55) | 53962.26 (43414.81-71544.34) | 2.51 (2.22-2.62) | 8.86 (7.76-11.38) | 11.48 (9.24-15.23) | 0.78 (0.66-0.9) |
|  | 55-59 | 2815.93 (2367.29-3560.91) | 8524.36 (6771.2-11141.25) | 2.03 (1.86-2.13) | 5.3 (4.45-6.7) | 6.18 (4.91-8.08) | 0.38 (0.22-0.55) |
|  | 60-64 | 3220.03 (2741.27-4035.91) | 8877.86 (7124.09-11072.71) | 1.76 (1.6-1.74) | 7.52 (6.4-9.42) | 8.72 (7-10.88) | 0.5 (0.37-0.63) |
|  | 65-69 | 3072.95 (2658.38-4016.32) | 10850.08 (8548.71-14437.66) | 2.53 (2.22-2.59) | 9.64 (8.34-12.6) | 12.17 (9.59-16.2) | 0.69 (0.57-0.8) |
|  | 70-74 | 2674.55 (2309.33-3496.57) | 9900.48 (7985.01-13124.76) | 2.7 (2.46-2.75) | 12.24 (10.57-16) | 16.06 (12.96-21.3) | 0.85 (0.72-0.98) |
|  | 75-79 | 1931.55 (1681.03-2511.71) | 7549.74 (6157.07-10184.25) | 2.91 (2.66-3.05) | 14.45 (12.57-18.78) | 19.27 (15.71-25.99) | 0.95 (0.79-1.11) |
|  | 80-84 | 1086.83 (919.27-1378.63) | 5052.42 (4044.94-6364.02) | 3.65 (3.4-3.62) | 15.68 (13.26-19.89) | 21.21 (16.98-26.72) | 0.9 (0.74-1.06) |
|  | 85-89 | 460.36 (389.76-561.88) | 2404.26 (1891.13-3116.57) | 4.22 (3.85-4.55) | 16.87 (14.29-20.59) | 20.97 (16.49-27.18) | 0.61 (0.46-0.75) |
|  | 90-94 | 97.25 (79.07-118.81) | 688.76 (530.37-874.2) | 6.08 (5.71-6.36) | 14.69 (11.94-17.95) | 17.86 (13.76-22.67) | 0.49 (0.38-0.6) |
|  | 95+ | 13.72 (10.36-17.64) | 114.3 (81.9-145.45) | 7.33 (6.91-7.25) | 9.34 (7.06-12.01) | 10.99 (7.87-13.98) | 0.4 (0.27-0.52) |
| High-middle SDI | 55+ | 25750.55 (22817.27-27449.02) | 68500.55 (52534.59-79534.39) | 1.66 (1.3-1.9) | 14.93 (13.23-15.91) | 19.76 (15.15-22.94) | 0.88 (0.83-0.93) |
|  | 55-59 | 3474.07 (2954.06-3792.15) | 8319.12 (6013.56-10146.03) | 1.39 (1.04-1.68) | 7.47 (6.35-8.16) | 9.25 (6.69-11.28) | 0.67 (0.56-0.78) |
|  | 60-64 | 4685.95 (4096.15-5052.58) | 9332.91 (6916.21-11109.5) | 0.99 (0.69-1.2) | 10.89 (9.52-11.74) | 12.8 (9.48-15.23) | 0.55 (0.44-0.66) |
|  | 65-69 | 4954.81 (4346.65-5317.13) | 12527.49 (9262.19-15156.22) | 1.53 (1.13-1.85) | 15.72 (13.79-16.87) | 18.87 (13.95-22.82) | 0.64 (0.5-0.78) |
|  | 70-74 | 4298.22 (3819.33-4624.02) | 12588.47 (9490.28-14793.23) | 1.93 (1.48-2.2) | 20.81 (18.49-22.39) | 25.77 (19.43-30.28) | 0.67 (0.55-0.79) |
|  | 75-79 | 4330.11 (3891.73-4613.23) | 10381.14 (7972.6-12190.48) | 1.4 (1.05-1.64) | 26.01 (23.38-27.72) | 34.76 (26.69-40.81) | 0.82 (0.71-0.94) |
|  | 80-84 | 2686 (2392.55-2900.67) | 8749.04 (6939.46-10049.89) | 2.26 (1.9-2.46) | 28.86 (25.71-31.16) | 40.07 (31.79-46.03) | 1.06 (0.96-1.16) |
|  | 85-89 | 1024.92 (878-1121.69) | 4710.41 (3785.79-5490.16) | 3.6 (3.31-3.89) | 27.41 (23.48-29.99) | 41.4 (33.28-48.26) | 1.22 (1.07-1.37) |
|  | 90-94 | 259.97 (219.86-286.49) | 1661.59 (1288.48-1931.22) | 5.39 (4.86-5.74) | 27.95 (23.64-30.8) | 38.01 (29.47-44.17) | 1.04 (0.85-1.23) |
|  | 95+ | 36.5 (28.64-41.26) | 230.38 (169.64-270.63) | 5.31 (4.92-5.56) | 19.35 (15.19-21.88) | 20.87 (15.37-24.52) | 0.17 (-0.02-0.35) |
| High SDI | 55+ | 59059.87 (55510.54-61404.15) | 123160.57 (109214.56-134051.48) | 1.09 (0.97-1.18) | 31.67 (29.77-32.93) | 35.7 (31.66-38.85) | 0.35 (0.3-0.41) |
|  | 55-59 | 5494.48 (5168.23-5780.07) | 8098.25 (7381.77-8628.93) | 0.47 (0.43-0.49) | 12.91 (12.15-13.58) | 11.13 (10.15-11.86) | -0.44 (-0.52--0.35) |
|  | 60-64 | 7492.83 (7129.72-7781.21) | 11226.88 (10163.91-12064.61) | 0.5 (0.43-0.55) | 18.78 (17.87-19.5) | 16.47 (14.91-17.7) | -0.44 (-0.51--0.38) |
|  | 65-69 | 10218.78 (9695.31-10635.5) | 16287.32 (14664.39-17660.9) | 0.59 (0.51-0.66) | 29.24 (27.74-30.43) | 26.87 (24.19-29.13) | -0.31 (-0.39--0.22) |
|  | 70-74 | 10063.89 (9438-10474.83) | 20229.09 (18301.73-21816.73) | 1.01 (0.94-1.08) | 40.18 (37.68-41.82) | 37.91 (34.3-40.89) | -0.17 (-0.27--0.06) |
|  | 75-79 | 11235.08 (10344.84-11815.5) | 20796.52 (18435.98-22847.69) | 0.85 (0.78-0.93) | 53.07 (48.86-55.81) | 57.43 (50.91-63.09) | 0.33 (0.27-0.4) |
|  | 80-84 | 8842.14 (7690.32-9473.45) | 21360.1 (17616.16-23975.71) | 1.42 (1.29-1.53) | 64.87 (56.42-69.5) | 79.19 (65.31-88.89) | 0.72 (0.61-0.83) |
|  | 85-89 | 4288.1 (3559.56-4716.13) | 15357.31 (11802.66-17864.21) | 2.58 (2.32-2.79) | 65.83 (54.64-72.4) | 93.09 (71.54-108.28) | 1.07 (0.96-1.18) |
|  | 90-94 | 1256.15 (990.76-1401.11) | 8013.5 (5815.13-9501.61) | 5.38 (4.87-5.78) | 58.88 (46.44-65.67) | 104.52 (75.85-123.93) | 1.87 (1.8-1.94) |
|  | 95+ | 168.42 (124.88-193.28) | 1791.61 (1186.63-2206.47) | 9.64 (8.5-10.42) | 30.26 (22.44-34.73) | 64.67 (42.83-79.65) | 2.62 (2.49-2.75) |
