# Supplementary material for: Global, Regional, and National Burden of Gallbladder and Biliary Tract Cancer in Adults Aged 55 Years and Older: Analysis of the Global Burden of Disease 1990–2021
Source: Research Square preprint supplement (doi:10.21203/rs.3.rs-7839914/v1), 2025-11-20
Supplement: Supplementary file 3 [file ee6b6257b32d5b74fd2eb08d.xlsx]

## Sheet: Table S1
The incidence of GBTC cases and rates aged 55 years and above in 1990 and 2021, and the trends from 1990 to 2021.
location		Incident cases			Incident rates
	1990_number(95%UI)	2021_number(95%UI)	percentage change(100%)	1990_per 100000(95%UI)	2021_per 100000(95%UI)	EAPC(95% CI)
Andean Latin America	802.05 (615.36-946.46)	2001.97 (1528.68-2606.71)	1.5	23.9 (18.34-28.2)	20.21 (15.43-26.31)	-0.71 (-0.86--0.56)
Australasia	714.53 (671.23-754.99)	1674.76 (1446.81-1814.59)	1.34	18.14 (17.04-19.16)	18.96 (16.38-20.54)	0.01 (-0.17-0.19)
Caribbean	346.46 (305.5-380.67)	459.71 (402.39-524.25)	0.33	8.04 (7.09-8.83)	4.97 (4.35-5.66)	-1.76 (-1.88--1.65)
Central Asia	401.95 (356.52-468.55)	551.88 (489.98-624.29)	0.37	5.03 (4.46-5.86)	3.79 (3.37-4.29)	-1.35 (-1.69--1.02)
Central Europe	5914.28 (5553.93-6170)	6002.65 (5446.29-6562.79)	0.01	22.3 (20.94-23.27)	16.21 (14.71-17.72)	-1.29 (-1.39--1.2)
Central Latin America	2751.24 (2644.1-2819.21)	4503.74 (4011.55-4992.76)	0.64	20.27 (19.48-20.78)	10.53 (9.38-11.67)	-2.48 (-2.65--2.31)
Central Sub-Saharan Africa	50.63 (35.27-72.72)	127.64 (86.18-180.24)	1.52	1.35 (0.94-1.93)	1.41 (0.96-2)	0.24 (0.19-0.3)
East Asia	14211.01 (11156.49-18484.54)	46000.4 (32201.86-59042.09)	2.24	9.54 (7.49-12.41)	11.73 (8.21-15.06)	0.68 (0.61-0.75)
Eastern Europe	4006.92 (3752.06-4306.12)	5906.88 (5467.85-6375.97)	0.47	8.2 (7.67-8.81)	9.52 (8.81-10.27)	0.04 (-0.21-0.29)
Eastern Sub-Saharan Africa	589.3 (405.24-796.52)	1172.62 (829.71-1547.21)	0.99	4.84 (3.33-6.55)	4.34 (3.07-5.72)	-0.47 (-0.55--0.4)
Global	92729.48 (83666.09-100988.05)	192028.39 (163006.93-216508.46)	1.07	13.81 (12.46-15.04)	12.92 (10.97-14.57)	-0.28 (-0.31--0.25)
High-income Asia Pacific	16739.34 (15339.06-17690.75)	35717.67 (29693.34-40139.06)	1.13	47.87 (43.87-50.59)	50.66 (42.12-56.93)	0.17 (0.07-0.26)
High-income North America	8185.21 (7523.67-8539.84)	12853.55 (11523.35-13601.38)	0.57	14.13 (12.99-14.74)	11.42 (10.24-12.09)	-0.92 (-1.01--0.83)
High-middle SDI	23675.74 (20762.08-25317.78)	46880.01 (36383.24-53931.06)	0.98	13.72 (12.03-14.67)	13.52 (10.49-15.56)	-0.15 (-0.22--0.08)
High SDI	44647.95 (41456.29-46591.12)	74481.48 (64593.18-81772.73)	0.67	23.94 (22.23-24.99)	21.59 (18.72-23.7)	-0.44 (-0.49--0.39)
Low-middle SDI	6939.97 (5953.16-9970.96)	21123.48 (16675.37-26296.15)	2.04	6.88 (5.91-9.89)	8.76 (6.92-10.91)	0.85 (0.8-0.9)
Low SDI	1746.14 (1394.47-2429.13)	4910.12 (3366.26-6009.86)	1.81	4.68 (3.74-6.51)	5.98 (4.1-7.32)	0.91 (0.85-0.97)
Middle SDI	15589.56 (13681.77-20107.4)	44488 (36182.71-57850.35)	1.85	8.98 (7.88-11.59)	9.47 (7.7-12.31)	0.07 (0-0.14)
North Africa and Middle East	1738.52 (1420.45-2302.78)	4765.81 (3523.75-5910.27)	1.74	6.15 (5.03-8.15)	6.25 (4.62-7.75)	0.25 (0.15-0.36)
Oceania	13.03 (8.04-16.88)	27.88 (19.09-35.34)	1.14	2.71 (1.67-3.51)	2.26 (1.55-2.86)	-0.65 (-0.69--0.61)
South Asia	7114.85 (5814.32-10291.94)	26891.9 (18704.6-31801.53)	2.78	7.49 (6.12-10.84)	10.83 (7.53-12.81)	1.22 (1.16-1.28)
Southeast Asia	3202.31 (2362.56-4082.82)	10092.33 (7315.98-12808.28)	2.15	7.56 (5.58-9.64)	8.81 (6.39-11.18)	0.29 (0.22-0.36)
Southern Latin America	3351.5 (3159.88-3496.54)	3916.88 (3552.79-4172.24)	0.17	42.31 (39.89-44.14)	26.62 (24.14-28.35)	-1.62 (-1.71--1.53)
Southern Sub-Saharan Africa	135.65 (98.22-180.85)	367.39 (258.09-431.97)	1.71	3.07 (2.22-4.09)	3.77 (2.65-4.44)	0.77 (0.57-0.96)
Tropical Latin America	2205.28 (2066.3-2293.45)	4894.03 (4449.72-5157.76)	1.22	14.56 (13.65-15.15)	11.05 (10.05-11.64)	-1.08 (-1.21--0.94)
Western Europe	20225.09 (18757.13-21126.21)	24021.65 (21051.34-25922.34)	0.19	20.83 (19.31-21.75)	16.11 (14.12-17.38)	-0.85 (-0.97--0.74)
Western Sub-Saharan Africa	30.31 (24.74-43.02)	77.06 (52.28-93.93)	1.54	0.21 (0.17-0.3)	0.24 (0.16-0.29)	1.05 (0.7-1.41)

## Sheet: Table S2
The deaths of GBTC cases and rates aged 55 years and above in 1990 and 2021, and the trends from 1990 to 2021.
location		Death cases			Death rates
	1990_number(95%UI)	2021_number(95%UI)	percentage change(100%)	1990_per 100000(95%UI)	2021_per 100000(95%UI)	EAPC(95% CI)
Andean Latin America	876.57 (676.81-1034.6)	2059.1 (1573.6-2643.61)	1.35	26.12 (20.17-30.83)	20.79 (15.88-26.69)	-0.88 (-1.02--0.75)
Australasia	381.78 (357.98-401.7)	591.62 (515.87-638.07)	0.55	9.69 (9.09-10.2)	6.7 (5.84-7.22)	-1.5 (-1.65--1.35)
Caribbean	363.16 (319.68-399.66)	459.74 (402.31-527.66)	0.27	8.43 (7.42-9.27)	4.97 (4.35-5.7)	-1.9 (-2.02--1.79)
Central Asia	424.55 (376.13-494.74)	572.31 (507.41-647.33)	0.35	5.31 (4.7-6.19)	3.93 (3.49-4.45)	-1.38 (-1.7--1.06)
Central Europe	6178.54 (5835.91-6440.95)	5668.08 (5170.99-6172.2)	-0.08	23.3 (22.01-24.29)	15.31 (13.97-16.67)	-1.63 (-1.72--1.53)
Central Latin America	2969.53 (2855.75-3046.6)	4602.1 (4108.88-5089.55)	0.55	21.88 (21.04-22.45)	10.76 (9.61-11.9)	-2.63 (-2.78--2.47)
Central Sub-Saharan Africa	54.01 (37.86-77.51)	136.16 (91.81-192.8)	1.52	1.44 (1.01-2.06)	1.51 (1.02-2.14)	0.25 (0.2-0.3)
East Asia	14794.48 (11633.14-19337.61)	35026.81 (24814.98-45315.1)	1.37	9.93 (7.81-12.98)	8.93 (6.33-11.56)	-0.43 (-0.55--0.3)
Eastern Europe	3718.49 (3474.27-3999.06)	4362.41 (4017.53-4714.92)	0.17	7.61 (7.11-8.18)	7.03 (6.47-7.6)	-0.74 (-1.03--0.45)
Eastern Sub-Saharan Africa	635.07 (437.34-856.82)	1271.46 (900.14-1681.42)	1	5.22 (3.59-7.04)	4.7 (3.33-6.22)	-0.44 (-0.51--0.37)
Global	86386.38 (77436.32-95543.88)	155076.88 (129702.64-174512.2)	0.8	12.87 (11.53-14.23)	10.44 (8.73-11.74)	-0.77 (-0.81--0.73)
High-income Asia Pacific	14914.86 (13664.03-15832.45)	27235.9 (22411.06-30617.23)	0.83	42.65 (39.08-45.28)	38.63 (31.79-43.43)	-0.42 (-0.49--0.34)
High-income North America	4700.15 (4311.1-4910.76)	5610.61 (4998.7-5948.21)	0.19	8.11 (7.44-8.48)	4.99 (4.44-5.29)	-1.8 (-1.92--1.67)
High-middle SDI	23151.57 (20243.86-24815.96)	35957.08 (28256.06-41125)	0.55	13.42 (11.73-14.38)	10.37 (8.15-11.86)	-0.97 (-1.08--0.86)
High SDI	37233.76 (34361.64-38934.67)	50641.07 (43444.24-55944.3)	0.36	19.97 (18.43-20.88)	14.68 (12.59-16.22)	-1.15 (-1.22--1.09)
Low-middle SDI	7465.34 (6394.91-10757.07)	22456.96 (17705.69-27976.3)	2.01	7.41 (6.34-10.67)	9.32 (7.34-11.6)	0.82 (0.76-0.89)
Low SDI	1872.45 (1499.94-2610.86)	5270.93 (3616.93-6428.31)	1.81	5.02 (4.02-7)	6.42 (4.41-7.83)	0.93 (0.87-1)
Middle SDI	16530.29 (14550.79-21389.84)	40618.56 (33079.4-51794.03)	1.46	9.52 (8.38-12.32)	8.64 (7.04-11.02)	-0.43 (-0.48--0.38)
North Africa and Middle East	1853.12 (1515.78-2467.81)	4661.73 (3454.46-5780.83)	1.52	6.56 (5.36-8.73)	6.12 (4.53-7.58)	0 (-0.11-0.12)
Oceania	13.75 (8.46-17.71)	29.3 (20.05-37.14)	1.13	2.86 (1.76-3.68)	2.37 (1.62-3.01)	-0.68 (-0.73--0.63)
South Asia	7613.11 (6236.2-11069.21)	28422.87 (19696.69-33691.15)	2.73	8.02 (6.57-11.66)	11.45 (7.93-13.57)	1.2 (1.13-1.27)
Southeast Asia	3392.72 (2523.97-4325.99)	9688.98 (7098.52-12365.95)	1.86	8.01 (5.96-10.22)	8.46 (6.2-10.79)	-0.05 (-0.13-0.03)
Southern Latin America	3521.47 (3317.08-3677.42)	3618.07 (3302.34-3843.25)	0.03	44.45 (41.87-46.42)	24.59 (22.44-26.12)	-2.03 (-2.13--1.94)
Southern Sub-Saharan Africa	147.94 (107.36-197)	390.33 (273.79-456.67)	1.64	3.34 (2.43-4.45)	4.01 (2.81-4.69)	0.68 (0.47-0.89)
Tropical Latin America	2369.77 (2216.25-2467.13)	5077.97 (4592.78-5354.59)	1.14	15.65 (14.64-16.29)	11.46 (10.37-12.09)	-1.17 (-1.29--1.05)
Western Europe	17430.31 (16082.29-18222.37)	15507.14 (13490.76-16822.21)	-0.11	17.95 (16.56-18.76)	10.4 (9.05-11.28)	-1.83 (-1.99--1.67)

## Sheet: Table S3
The DALY of GBTC cases and rates aged 55 years and above in 1990 and 2021, and the trends from 1990 to 2021.
location		DALY cases			DALY rates
	1990_number(95%UI)	2021_number(95%UI)	percentage change(100%)	1990_per 100000(95%UI)	2021_per 100000(95%UI)	EAPC(95% CI)
Andean Latin America	18783.73 (14198.64-22295.94)	42240.72 (31941.91-55514.5)	1.25	559.72 (423.1-664.38)	426.4 (322.44-560.39)	-1.11 (-1.26--0.96)
Australasia	7454.65 (7076.57-7801.18)	10324.77 (9249.53-11060.96)	0.39	189.23 (179.63-198.02)	116.87 (104.7-125.21)	-1.86 (-2.02--1.7)
Caribbean	7490.53 (6506.49-8301.25)	9493.89 (8240.11-10981.16)	0.27	173.81 (150.97-192.62)	102.54 (89-118.61)	-1.89 (-2.02--1.77)
Central Asia	9602.33 (8544.19-11142.53)	13041.35 (11522.06-14798.33)	0.36	120.06 (106.83-139.32)	89.63 (79.19-101.71)	-1.48 (-1.84--1.12)
Central Europe	127256.45 (119666.89-132315.76)	107815.35 (98927.39-117557.5)	-0.15	479.84 (451.23-498.92)	291.17 (267.17-317.48)	-1.87 (-1.96--1.78)
Central Latin America	63456.78 (61534.29-64971.36)	96532.52 (86102.05-107719.38)	0.52	467.62 (453.45-478.78)	225.72 (201.33-251.88)	-2.73 (-2.92--2.55)
Central Sub-Saharan Africa	1314.05 (904.25-1910.75)	3232.9 (2184.68-4579.9)	1.46	34.95 (24.05-50.81)	35.83 (24.21-50.76)	0.17 (0.1-0.25)
East Asia	331272.32 (259653-432161.31)	708497.1 (507185.26-918246.4)	1.14	222.4 (174.32-290.13)	180.68 (129.34-234.17)	-0.73 (-0.83--0.63)
Eastern Europe	81295.18 (76022.43-87704.44)	88708.67 (81797.74-96141.48)	0.09	166.27 (155.49-179.38)	142.9 (131.76-154.87)	-1.07 (-1.37--0.77)
Eastern Sub-Saharan Africa	14875.47 (10012.1-20230.04)	28172.18 (19781.36-37344.93)	0.89	122.27 (82.3-166.29)	104.2 (73.16-138.12)	-0.66 (-0.73--0.58)
Global	1787213.43 (1617188.16-1980946.07)	2999189.07 (2489402.8-3445818.59)	0.68	266.18 (240.86-295.04)	201.83 (167.53-231.89)	-1.01 (-1.05--0.96)
High-income Asia Pacific	290653.16 (267867-308131.74)	397407.53 (340284.9-441790.8)	0.37	831.19 (766.03-881.18)	563.67 (482.65-626.62)	-1.38 (-1.46--1.31)
High-income North America	87744.61 (82495.58-91012.51)	106033.27 (97679.63-111349)	0.21	151.47 (142.41-157.11)	94.22 (86.8-98.95)	-1.69 (-1.84--1.54)
High-middle SDI	486666.35 (423442.28-524488.97)	704745.66 (547705.36-806559.73)	0.45	282.09 (245.44-304.01)	203.29 (157.99-232.65)	-1.22 (-1.31--1.13)
High SDI	710900.4 (663136.87-742212.6)	821870.88 (720349.24-899678.7)	0.16	381.25 (355.64-398.05)	238.21 (208.79-260.77)	-1.69 (-1.76--1.62)
Low-middle SDI	172272.88 (147190.51-248674.33)	495546.42 (384643.84-614391.77)	1.88	170.9 (146.02-246.7)	205.55 (159.55-254.85)	0.65 (0.6-0.7)
Low SDI	44496.99 (35289.18-61965.48)	117968.87 (81115.81-144980.33)	1.65	119.27 (94.59-166.09)	143.76 (98.85-176.68)	0.68 (0.63-0.74)
Middle SDI	370154.12 (324067.1-479260.67)	856494.19 (693809.73-1087203.65)	1.31	213.27 (186.72-276.13)	182.29 (147.66-231.39)	-0.64 (-0.7--0.58)
North Africa and Middle East	41096.27 (33495.2-54458.15)	98774.54 (72369.27-120634.32)	1.4	145.4 (118.51-192.68)	129.57 (94.93-158.24)	-0.24 (-0.34--0.15)
Oceania	332.74 (200.55-430.41)	698.39 (472.73-897.57)	1.1	69.16 (41.69-89.47)	56.59 (38.3-72.73)	-0.67 (-0.71--0.64)
South Asia	180503.97 (146641.82-261730.45)	633426.08 (434140.89-751235.72)	2.51	190.12 (154.45-275.67)	255.11 (174.85-302.56)	0.96 (0.9-1.02)
Southeast Asia	76845.14 (57122.07-97684.13)	208887.43 (152480.49-266552.96)	1.72	181.49 (134.91-230.71)	182.35 (133.11-232.69)	-0.2 (-0.28--0.13)
Southern Latin America	72064.65 (68752.19-75228.95)	71856.46 (66743.68-76018.24)	0	909.74 (867.92-949.68)	488.28 (453.54-516.57)	-2.11 (-2.2--2.02)
Southern Sub-Saharan Africa	3148.88 (2286.06-4241.38)	8594.2 (6052.05-10158.81)	1.73	71.16 (51.67-95.86)	88.28 (62.17-104.35)	0.82 (0.62-1.03)
Tropical Latin America	51247.42 (48695.72-53196.36)	105303.54 (97650.36-110139.7)	1.05	338.46 (321.61-351.33)	237.72 (220.44-248.63)	-1.34 (-1.48--1.19)
Western Europe	320036.7 (300083.26-332149.24)	258345.61 (231837.86-276473.65)	-0.19	329.55 (309.01-342.03)	173.23 (155.46-185.39)	-2.16 (-2.32--2)
Western Sub-Saharan Africa	738.39 (600.74-1035.29)	1802.56 (1246.32-2237.01)	1.44	5.12 (4.16-7.17)	5.61 (3.88-6.96)	0.89 (0.53-1.25)

## Sheet: Table S4
The prevalence of GBTC cases and rates aged 55 years and above in 1990 and 2021 across 204 countries, and the trends from 1990 to 2021.
location		Prevalent cases			Prevalent rates
	1990_number(95%UI)	2021_number(95%UI)	percentage change(100%)	1990_per 100000(95%UI)	2021_per 100000(95%UI)	EAPC(95% CI)
Afghanistan	71.24 (28.59-141.09)	96.92 (47.3-151.73)	0.36	5.86 (2.35-11.61)	7.89 (3.85-12.35)	1.41 (1.27-1.55)
Albania	23.52 (16.67-32.43)	54.38 (36.46-80.61)	1.31	6.78 (4.8-9.34)	6.92 (4.64-10.25)	0.56 (0.38-0.73)
Algeria	317.24 (215.53-417.73)	905.1 (650.71-1196.31)	1.85	15.14 (10.29-19.94)	14.9 (10.71-19.7)	0.01 (-0.09-0.1)
American Samoa	0.1 (0.07-0.13)	0.18 (0.14-0.28)	0.8	2.74 (2.05-3.65)	2.14 (1.64-3.3)	-0.79 (-1.19--0.39)
Andorra	2.63 (1.79-3.81)	6.9 (4.67-9.56)	1.62	26.68 (18.1-38.62)	26.07 (17.64-36.13)	0.14 (-0.2-0.49)
Angola	8.15 (5.25-12.12)	29.87 (19.7-40.43)	2.67	1.31 (0.84-1.95)	1.54 (1.02-2.09)	0.78 (0.66-0.9)
Antigua and Barbuda	1.06 (0.98-1.16)	1.09 (1.03-1.17)	0.03	12.32 (11.3-13.48)	5.8 (5.44-6.18)	-2.94 (-3.26--2.61)
Argentina	1707.91 (1590.92-1801.55)	1746.67 (1613.75-1868.41)	0.02	30.69 (28.59-32.38)	18.71 (17.29-20.02)	-1.58 (-1.7--1.46)
Armenia	16.99 (14.29-20.41)	65.67 (55.16-77.46)	2.87	3.49 (2.94-4.19)	8.35 (7.01-9.85)	3.4 (2.68-4.12)
Australia	1289.17 (1213.62-1368.54)	3717.9 (3219.28-4069.89)	1.88	39.29 (36.98-41.7)	50.19 (43.46-54.94)	0.8 (0.39-1.21)
Austria	577.07 (533.43-615.71)	605.7 (531.55-662.06)	0.05	29.66 (27.41-31.64)	20.5 (17.99-22.4)	-1.05 (-1.23--0.88)
Azerbaijan	33.38 (21.05-48.73)	56.53 (33.21-84.85)	0.69	3.83 (2.41-5.59)	2.95 (1.73-4.43)	-0.97 (-1.18--0.76)
Bahamas	2.79 (2.48-3.06)	4.9 (4.02-5.96)	0.76	11.34 (10.1-12.45)	6.81 (5.59-8.29)	-1.84 (-1.99--1.68)
Bahrain	1.29 (0.98-1.71)	6.66 (4.24-9.37)	4.16	4.6 (3.48-6.09)	4.1 (2.61-5.77)	-0.63 (-0.85--0.4)
Bangladesh	570.61 (424.83-852.34)	2046.45 (1367.87-3174.02)	2.59	7.53 (5.61-11.25)	8.76 (5.85-13.58)	0.51 (0.41-0.62)
Barbados	4.72 (4.28-5.15)	6.48 (5.02-8.11)	0.37	10.07 (9.13-10.98)	7.11 (5.51-8.9)	-1.26 (-1.43--1.1)
Belarus	144.53 (129.69-160.73)	249.56 (202.43-306.53)	0.73	6.24 (5.6-6.94)	8.68 (7.04-10.66)	0.97 (0.81-1.13)
Belgium	412.72 (371.12-447.61)	457.1 (395.87-504.99)	0.11	15.74 (14.15-17.07)	12.09 (10.47-13.36)	-0.96 (-1.19--0.74)
Belize	1.26 (1.08-1.45)	2.37 (2.08-2.7)	0.88	8.18 (6.99-9.44)	4.73 (4.16-5.39)	-2.23 (-2.58--1.87)
Benin	0.49 (0.38-0.71)	1.38 (0.79-1.86)	1.82	0.15 (0.12-0.22)	0.17 (0.1-0.23)	1.09 (0.51-1.68)
Bermuda	0.95 (0.75-1.09)	1.32 (1.1-1.63)	0.39	9.01 (7.12-10.33)	5.65 (4.74-7)	-1.96 (-2.18--1.74)
Bhutan	3.13 (2.03-5.03)	10.2 (6.98-14.62)	2.26	7.88 (5.11-12.67)	10.24 (7.01-14.68)	0.77 (0.72-0.81)
Bolivia (Plurinational State of)	173.18 (100.33-235.97)	400.9 (256.48-588.67)	1.31	33.03 (19.13-45)	25.94 (16.6-38.09)	-0.87 (-0.95--0.79)
Bosnia and Herzegovina	175.37 (111.51-207.99)	194.03 (140.37-332.15)	0.11	23.91 (15.2-28.35)	17.72 (12.82-30.33)	-1.27 (-1.42--1.12)
Botswana	2.51 (1.71-3.68)	6.43 (4.57-9.63)	1.56	2.7 (1.84-3.96)	2.65 (1.89-3.97)	0.34 (0.06-0.61)
Brazil	2108.56 (1987.98-2190.38)	4962.22 (4564.4-5212.53)	1.35	14.27 (13.45-14.82)	11.46 (10.54-12.04)	-0.92 (-1.07--0.76)
Brunei Darussalam	2.63 (1.91-3.33)	6.29 (4.97-8.22)	1.39	16.77 (12.21-21.27)	10.5 (8.31-13.72)	-1.32 (-1.41--1.22)
Bulgaria	217.85 (197.23-236.95)	287.52 (239.08-339.74)	0.32	9.63 (8.71-10.47)	12.1 (10.06-14.29)	0.62 (0.43-0.81)
Burkina Faso	1.19 (0.89-1.63)	3.01 (1.67-3.99)	1.53	0.17 (0.12-0.22)	0.2 (0.11-0.27)	1.43 (0.81-2.05)
Burundi	16.45 (9.8-23.6)	24.55 (13.95-36.15)	0.49	4.37 (2.6-6.27)	3.07 (1.74-4.52)	-1.53 (-1.67--1.39)
Cabo Verde	0.22 (0.16-0.42)	1.29 (0.48-1.74)	4.86	0.56 (0.41-1.06)	1.68 (0.63-2.27)	3.62 (2.72-4.54)
Cambodia	34.19 (21.52-58.92)	99.6 (62.53-214.07)	1.91	4.61 (2.9-7.95)	4.58 (2.88-9.85)	-0.14 (-0.36-0.09)
Cameroon	1.29 (1.02-1.76)	4.01 (2.3-5.67)	2.11	0.17 (0.14-0.24)	0.2 (0.11-0.28)	1.23 (0.63-1.83)
Canada	1253.56 (1155.16-1345.17)	2203.74 (1942.46-2411.48)	0.76	22.96 (21.16-24.64)	17.96 (15.83-19.65)	-0.71 (-0.91--0.51)
Central African Republic	2.81 (1.82-4.43)	4.78 (2.98-7.94)	0.7	1.49 (0.96-2.35)	1.34 (0.83-2.22)	-0.3 (-0.34--0.25)
Chad	0.61 (0.46-0.91)	1.6 (1.04-2.14)	1.62	0.13 (0.1-0.2)	0.17 (0.11-0.23)	1.69 (1.16-2.22)
Chile	1426.27 (1343.1-1523.03)	2633.19 (2374.11-2889.72)	0.85	84.81 (79.86-90.56)	58.81 (53.02-64.54)	-1.39 (-1.57--1.2)
China	13664.11 (10600.6-17661.25)	65242.03 (43896.32-85016.83)	3.77	9.52 (7.39-12.31)	17.22 (11.58-22.43)	2.14 (2-2.27)
Colombia	582.74 (546.89-622.78)	1311.84 (1095.53-1537.21)	1.25	20.24 (19-21.63)	13.72 (11.46-16.07)	-1.5 (-1.74--1.27)
Comoros	1.08 (0.71-1.47)	2.84 (1.77-4.39)	1.63	3.33 (2.19-4.52)	3.52 (2.19-5.43)	0.18 (0.13-0.22)
Congo	3.07 (2.03-4.47)	7.37 (4.81-9.87)	1.4	1.73 (1.14-2.51)	1.7 (1.11-2.27)	-0.02 (-0.08-0.03)
Cook Islands	0.07 (0.04-0.09)	0.14 (0.09-0.21)	1	3.31 (1.77-4.39)	2.95 (1.97-4.42)	-0.59 (-0.76--0.41)
Costa Rica	57.01 (52.25-61.34)	109.78 (96.2-124.11)	0.93	20.05 (18.37-21.57)	11.47 (10.05-12.96)	-2.57 (-2.9--2.23)
Cote d'Ivoire	0.91 (0.7-1.2)	3.2 (1.82-4.35)	2.52	0.14 (0.11-0.19)	0.18 (0.1-0.24)	1.5 (0.95-2.06)
Croatia	251.57 (229.21-275.36)	528.26 (443.72-613.94)	1.1	22.6 (20.59-24.74)	35.42 (29.75-41.17)	1.55 (1.37-1.73)
Cuba	154.65 (142.47-167.79)	200.01 (172.89-226.3)	0.29	9.13 (8.41-9.9)	5.85 (5.06-6.62)	-1.69 (-1.84--1.54)
Cyprus	22.17 (15.79-28.17)	61.44 (45.22-81.8)	1.77	15.87 (11.3-20.17)	17.58 (12.94-23.4)	0.65 (0.46-0.85)
Czechia	982.91 (889.18-1079.14)	1217.38 (1019.15-1441.84)	0.24	41.51 (37.55-45.57)	34.85 (29.17-41.27)	-0.95 (-1.08--0.81)
Democratic People's Republic of Korea	198.37 (134.73-341.26)	394.81 (263.6-715.87)	0.99	7.45 (5.06-12.82)	7.01 (4.68-12.7)	0.15 (-0.01-0.31)
Democratic Republic of the Congo	31.92 (21.68-47.15)	77.46 (49.15-118.81)	1.43	1.21 (0.82-1.79)	1.28 (0.81-1.97)	0.25 (0.14-0.36)
Denmark	186.98 (168.21-204.18)	455.52 (404.34-504.19)	1.44	14.33 (12.89-15.65)	23.66 (21-26.19)	1.53 (1.29-1.76)
Djibouti	0.64 (0.43-0.95)	3.33 (1.97-5.44)	4.2	3 (2.02-4.42)	3.21 (1.9-5.24)	0.21 (0.18-0.24)
Dominica	1.05 (0.7-1.44)	1.15 (0.85-1.47)	0.1	10.71 (7.15-14.65)	7.61 (5.61-9.73)	-1.37 (-1.49--1.25)
Dominican Republic	28.6 (16.35-35.81)	64.52 (48.18-92.28)	1.26	4.68 (2.67-5.86)	3.86 (2.88-5.52)	-0.36 (-0.51--0.2)
Ecuador	189.14 (177.49-200.71)	416.37 (329.99-514.51)	1.2	22 (20.64-23.34)	15.05 (11.92-18.59)	-1.17 (-1.31--1.04)
Egypt	183.99 (152.21-296.31)	664.01 (461.86-833.9)	2.61	4.11 (3.4-6.63)	6 (4.17-7.54)	1.78 (1.51-2.04)
El Salvador	64.31 (46.69-76.24)	134.42 (103.79-186.26)	1.09	13.15 (9.55-15.59)	13.14 (10.15-18.21)	-0.36 (-0.54--0.18)
Equatorial Guinea	0.45 (0.29-0.7)	1.31 (0.8-1.95)	1.91	1.41 (0.91-2.2)	1.65 (1.02-2.46)	0.76 (0.65-0.87)
Eritrea	6.09 (3.97-9.43)	17.48 (10.24-25.93)	1.87	3.45 (2.24-5.34)	3.97 (2.32-5.89)	0.51 (0.43-0.58)
Estonia	38.97 (35.86-42.33)	62.56 (53.66-71.42)	0.61	10.87 (10-11.81)	14.3 (12.27-16.33)	0.75 (0.53-0.97)
Eswatini	1.3 (0.92-1.88)	3.45 (2.2-5.18)	1.65	2.88 (2.04-4.16)	3.81 (2.42-5.72)	1.25 (0.97-1.53)
Ethiopia	246.78 (150.03-392.99)	404.53 (278.61-573.9)	0.64	7.68 (4.67-12.23)	5.91 (4.07-8.38)	-1.17 (-1.36--0.97)
Fiji	2.31 (1.67-3.06)	6.28 (3.68-8.7)	1.72	4.11 (2.97-5.44)	4.59 (2.69-6.36)	0.59 (0.4-0.78)
Finland	276.66 (249.85-296.39)	494.12 (427.26-547.31)	0.79	23.3 (21.04-24.96)	24.55 (21.23-27.19)	-0.03 (-0.29-0.24)
France	2705.87 (2473.97-2897.34)	3341.43 (2834.09-3782.16)	0.23	19.44 (17.78-20.82)	15.11 (12.82-17.11)	-0.82 (-0.94--0.7)
Gabon	1.85 (1.26-2.53)	3.13 (2-4.22)	0.69	1.89 (1.29-2.58)	1.75 (1.12-2.36)	-0.34 (-0.49--0.2)
Gambia	0 (0-0)	0 (0-0)	NA	0 (0-0)	0 (0-0)	0.24 (0.12-0.36)
Georgia	101.58 (83.18-123.19)	83.84 (69.1-101.45)	-0.17	9.14 (7.49-11.09)	7.99 (6.58-9.66)	-1.34 (-2.45--0.22)
Germany	8328.17 (7639.31-8896.83)	10653.12 (9284.58-11693.68)	0.28	39.69 (36.41-42.4)	33.8 (29.46-37.11)	-0.62 (-0.82--0.41)
Ghana	1.38 (1.02-1.88)	5.48 (3.31-7.13)	2.97	0.13 (0.1-0.18)	0.2 (0.12-0.26)	2.21 (1.56-2.86)
Greece	458.23 (423.25-488.9)	655.73 (582.61-709.12)	0.43	17.14 (15.83-18.29)	17.84 (15.85-19.29)	0.39 (-0.42-1.2)
Greenland	0.9 (0.54-1.1)	1.14 (0.84-1.58)	0.27	16.38 (9.84-19.98)	8.42 (6.2-11.65)	-1.94 (-2.18--1.7)
Grenada	1.15 (0.99-1.32)	1.33 (1.14-1.51)	0.16	9.56 (8.22-10.94)	6.61 (5.66-7.52)	-1.39 (-1.53--1.26)
Guam	0.29 (0.21-0.35)	0.55 (0.41-0.75)	0.9	2.24 (1.6-2.73)	1.45 (1.08-1.98)	-0.89 (-1.1--0.68)
Guatemala	109.61 (104.12-114.68)	134.18 (115.75-155.74)	0.22	19.06 (18.11-19.94)	7.33 (6.32-8.51)	-3.97 (-4.28--3.65)
Guinea	0.79 (0.58-1.16)	1.62 (0.96-2.25)	1.05	0.14 (0.1-0.21)	0.18 (0.11-0.25)	1.42 (0.95-1.9)
Guinea-Bissau	0.12 (0.08-0.17)	0.25 (0.16-0.35)	1.08	0.19 (0.12-0.27)	0.22 (0.14-0.3)	1.27 (0.69-1.86)
Guyana	4.45 (3.9-4.99)	5.22 (4.12-6.63)	0.17	7.27 (6.37-8.14)	4.64 (3.66-5.89)	-1.68 (-1.92--1.44)
Haiti	46 (25.39-69.05)	74.11 (46.22-112.17)	0.61	8.53 (4.71-12.8)	6.25 (3.9-9.47)	-0.98 (-1.05--0.91)
Honduras	33.94 (25.7-42.84)	157.73 (107.31-210.32)	3.65	10.18 (7.71-12.85)	15 (10.2-20)	1.33 (1.16-1.49)
Hungary	956.99 (877.42-1022.35)	635.94 (554.02-713.45)	-0.34	37.15 (34.07-39.69)	20 (17.42-22.43)	-2.42 (-2.61--2.22)
Iceland	8.69 (7.87-9.48)	17.28 (14.94-19.8)	0.99	18.21 (16.49-19.86)	17.75 (15.34-20.34)	-0.15 (-0.34-0.05)
India	5007.78 (4077.44-7282.77)	21439.82 (14804.98-25284.85)	3.28	6.53 (5.32-9.5)	10.66 (7.36-12.58)	1.67 (1.62-1.72)
Indonesia	525.67 (355.2-920.36)	1261.31 (832.8-2716.51)	1.4	3.25 (2.2-5.7)	3.01 (1.99-6.49)	-0.39 (-0.43--0.34)
Iran (Islamic Republic of)	96.66 (74.87-133.99)	598.33 (327.89-697.78)	5.19	2.1 (1.62-2.91)	4.61 (2.52-5.37)	3.62 (3.17-4.07)
Iraq	59.76 (43.82-82.08)	199.43 (137.41-260.81)	2.34	4.73 (3.47-6.5)	5.13 (3.54-6.71)	0.22 (-0.01-0.45)
Ireland	97.47 (89.18-105.28)	161 (139.56-181.19)	0.65	14.32 (13.1-15.47)	12.27 (10.63-13.81)	-0.52 (-0.79--0.25)
Israel	105.8 (96.38-114.6)	192.03 (169.16-212.71)	0.82	13.05 (11.89-14.14)	9.61 (8.46-10.64)	-1.23 (-1.44--1.02)
Italy	3730.34 (3441.13-3902.64)	6539.65 (5678.43-7188.14)	0.75	24.51 (22.61-25.64)	28.79 (25-31.64)	0.47 (0.22-0.71)
Jamaica	21.97 (19.74-24.46)	29.1 (22.62-37.63)	0.32	7.46 (6.7-8.3)	5.5 (4.28-7.11)	-1.28 (-1.53--1.02)
Japan	17893.84 (16523.87-18766.43)	39682.67 (32881.9-44280.89)	1.22	60.43 (55.8-63.37)	76.02 (62.99-84.83)	0.81 (0.67-0.94)
Jordan	16.47 (12.18-21.03)	80.63 (55.19-113.94)	3.9	7.66 (5.66-9.78)	6.41 (4.39-9.06)	-0.41 (-0.7--0.12)
Kazakhstan	125.39 (98.74-169.85)	159.3 (131.12-190.32)	0.27	6 (4.72-8.12)	5.02 (4.13-6)	-0.82 (-1.01--0.64)
Kenya	57.17 (42.58-88.42)	181.5 (131.01-259.1)	2.17	4.29 (3.19-6.63)	4.85 (3.5-6.93)	0.71 (0.57-0.85)
Kiribati	0.14 (0.07-0.17)	0.28 (0.15-0.38)	1	2.3 (1.24-2.92)	2.24 (1.17-3.03)	-0.07 (-0.17-0.04)
Kuwait	8.47 (7.68-9.28)	35.13 (28.58-41.9)	3.15	9.27 (8.39-10.15)	7.54 (6.13-8.99)	-0.16 (-1.19-0.88)
Kyrgyzstan	25.99 (22.12-30.81)	40.3 (32.78-48.8)	0.55	5.05 (4.3-5.98)	4.76 (3.88-5.77)	-2.4 (-3.56--1.22)
Lao People's Democratic Republic	16.31 (8.86-27.14)	27.6 (17.7-60.8)	0.69	4.76 (2.58-7.91)	3.57 (2.29-7.86)	-1.04 (-1.17--0.9)
Latvia	38.8 (35.66-42.06)	54.55 (47.34-62.59)	0.41	6.21 (5.7-6.73)	8.29 (7.19-9.51)	0.66 (0.51-0.81)
Lebanon	31.69 (19.03-42.23)	101.31 (62.06-133.83)	2.2	8.36 (5.02-11.14)	10.34 (6.33-13.66)	1.16 (0.94-1.38)
Lesotho	3.11 (2.12-4.84)	6.97 (4.57-10.45)	1.24	2.23 (1.51-3.46)	3.86 (2.53-5.79)	2.5 (2.15-2.84)
Liberia	0.29 (0.23-0.39)	0.54 (0.31-0.78)	0.86	0.16 (0.12-0.21)	0.16 (0.09-0.24)	1.04 (0.42-1.66)
Libya	50.33 (37.44-70.16)	145.16 (99.08-197.5)	1.88	16.18 (12.04-22.56)	17.36 (11.85-23.62)	0.77 (0.52-1.02)
Lithuania	87.52 (79.9-94.96)	148.83 (129.49-170.36)	0.7	11.04 (10.08-11.98)	15.38 (13.38-17.6)	0.31 (-0.2-0.81)
Luxembourg	15.3 (14.26-16.2)	24.92 (21.94-27.88)	0.63	16.39 (15.27-17.34)	14.02 (12.35-15.69)	-0.17 (-0.32--0.02)
Madagascar	24.76 (17.59-31.97)	47.73 (29.41-66.34)	0.93	2.93 (2.08-3.78)	2.58 (1.59-3.59)	-0.46 (-0.54--0.38)
Malawi	6.86 (4.58-8.81)	13.14 (8.03-19.19)	0.92	1.09 (0.73-1.4)	1.12 (0.69-1.64)	-0.04 (-0.15-0.07)
Malaysia	87.69 (49.51-106.63)	283.44 (179.81-346.43)	2.23	5.94 (3.35-7.22)	5.78 (3.67-7.07)	-0.48 (-0.69--0.27)
Maldives	0.67 (0.35-0.94)	1.59 (1.11-2.04)	1.37	4.39 (2.29-6.11)	2.91 (2.03-3.75)	-1.52 (-1.67--1.37)
Mali	6.54 (5.04-9.55)	14.82 (10.62-22.64)	1.27	0.98 (0.75-1.43)	1.02 (0.73-1.56)	0.77 (0.5-1.04)
Malta	7.71 (7.05-8.43)	16.21 (13.93-18.33)	1.1	10.64 (9.73-11.64)	10.27 (8.82-11.62)	-0.5 (-0.65--0.35)
Marshall Islands	0.08 (0.05-0.11)	0.15 (0.1-0.21)	0.87	3.11 (1.84-4.15)	2.54 (1.63-3.58)	-0.89 (-0.95--0.82)
Mauritania	0.28 (0.22-0.4)	0.65 (0.38-0.95)	1.32	0.17 (0.13-0.24)	0.18 (0.11-0.26)	0.83 (0.19-1.47)
Mauritius	10.11 (9.57-10.68)	14.01 (12.92-15.06)	0.39	8.31 (7.87-8.78)	4.14 (3.82-4.45)	-3.88 (-5.45--2.29)
Mexico	1480.09 (1435.05-1513.35)	2331.58 (2054.31-2612.03)	0.58	21.29 (20.64-21.77)	10.82 (9.53-12.12)	-2.61 (-2.81--2.41)
Micronesia (Federated States of)	0.28 (0.17-0.37)	0.35 (0.23-0.48)	0.25	3.53 (2.17-4.68)	2.64 (1.76-3.67)	-1.15 (-1.23--1.08)
Monaco	0.93 (0.59-1.19)	1.45 (1.06-2)	0.56	8.35 (5.32-10.77)	9.3 (6.78-12.76)	0.4 (0.3-0.5)
Mongolia	25.22 (16.55-38.28)	45.63 (32.62-68.77)	0.81	14.55 (9.55-22.09)	11.56 (8.26-17.42)	-0.84 (-0.99--0.69)
Montenegro	9.22 (6.58-12.15)	16.44 (11.78-22.28)	0.78	8.46 (6.04-11.15)	9.43 (6.76-12.78)	0.47 (0.34-0.61)
Morocco	68.66 (40.56-85.86)	190.98 (111.38-244.85)	1.78	2.93 (1.73-3.66)	3.18 (1.85-4.08)	0.34 (0.29-0.4)
Mozambique	29.55 (18.51-41.25)	66 (36.16-97.11)	1.23	3.02 (1.89-4.22)	3.69 (2.02-5.43)	0.99 (0.86-1.12)
Myanmar	159.37 (98.56-284.09)	265.03 (171.82-561.93)	0.66	4.07 (2.52-7.26)	3.14 (2.04-6.66)	-1.04 (-1.16--0.92)
Namibia	2.37 (1.7-3.09)	5.3 (3.52-7.48)	1.24	2.18 (1.56-2.85)	2.35 (1.56-3.31)	0.03 (-0.18-0.23)
Nauru	0.03 (0.02-0.04)	0.03 (0.02-0.05)	0	4.09 (2.48-5.74)	3.59 (2.11-5.03)	-0.63 (-0.72--0.53)
Nepal	109.66 (78.5-175.99)	387.91 (283.58-531.71)	2.54	7.12 (5.1-11.43)	9.8 (7.17-13.43)	1.14 (0.99-1.29)
Netherlands	794.15 (731.15-841.84)	1566.75 (1383.52-1731.73)	0.97	23.99 (22.08-25.43)	26.78 (23.65-29.6)	0.78 (0.55-1.01)
New Zealand	122.99 (112.08-132.45)	625.69 (544.07-696.85)	4.09	18.69 (17.03-20.13)	43.86 (38.14-48.85)	2.57 (2.1-3.05)
Nicaragua	34.93 (22.72-41.7)	86.47 (66.89-133.88)	1.48	14.06 (9.14-16.78)	10.62 (8.22-16.45)	-0.98 (-1.1--0.86)
Niger	0.56 (0.41-0.81)	2.04 (1.25-2.92)	2.64	0.13 (0.09-0.18)	0.15 (0.09-0.21)	1.15 (0.49-1.81)
Nigeria	11.54 (8.61-16.42)	27.08 (18.42-38.11)	1.35	0.16 (0.12-0.23)	0.18 (0.12-0.25)	0.84 (0.56-1.11)
Niue	0.01 (0.01-0.02)	0.01 (0.01-0.01)	0	3.55 (2.26-4.45)	2.97 (2.04-3.81)	-0.62 (-0.64--0.59)
North Macedonia	43.11 (32.47-55.92)	73.43 (53.75-96.03)	0.7	13.11 (9.87-17)	12.39 (9.07-16.2)	-0.37 (-0.58--0.16)
Northern Mariana Islands	0.05 (0.03-0.09)	0.19 (0.15-0.34)	2.8	1.89 (1.39-3.61)	1.92 (1.5-3.45)	0.14 (-0.48-0.77)
Norway	160.15 (147.45-169.74)	392.13 (347.69-425.38)	1.45	14.79 (13.62-15.67)	24.18 (21.44-26.23)	1.42 (1.13-1.7)
Oman	4.53 (3.01-6.16)	11.94 (8.23-16.02)	1.64	4.51 (3-6.13)	3.82 (2.64-5.13)	-0.2 (-0.35--0.05)
Pakistan	1142.82 (873.7-1545.3)	2758.12 (1988.14-3666.31)	1.41	12.53 (9.58-16.95)	13.91 (10.03-18.49)	0.01 (-0.18-0.2)
Palau	0.04 (0.02-0.05)	0.09 (0.06-0.12)	1.25	2.23 (1.46-3.14)	2.04 (1.33-2.95)	-0.34 (-0.42--0.26)
Palestine	10.64 (6.95-13.95)	26.59 (17.09-33.29)	1.5	7.33 (4.79-9.61)	6.18 (3.97-7.74)	-0.47 (-0.63--0.32)
Panama	31.08 (28.73-33.55)	50.39 (40.03-59.94)	0.62	12.83 (11.86-13.85)	6.78 (5.38-8.06)	-2.15 (-2.36--1.94)
Papua New Guinea	6.98 (3.9-9.78)	15.43 (10.22-21.7)	1.21	2.36 (1.32-3.31)	1.88 (1.24-2.64)	-0.93 (-1--0.85)
Paraguay	32.65 (23.62-41.7)	92.1 (64.29-128.64)	1.82	9 (6.51-11.49)	9.3 (6.49-12.99)	0 (-0.1-0.11)
Peru	405.71 (285.8-496.47)	1266.39 (881.58-1773.09)	2.12	20.58 (14.5-25.18)	22.64 (15.76-31.7)	-0.04 (-0.33-0.26)
Philippines	92.74 (72.84-155.31)	314.1 (247.94-558.71)	2.39	1.94 (1.53-3.25)	2.25 (1.78-4.01)	0.48 (0.45-0.51)
Poland	1744.28 (1669.51-1807.08)	1834.24 (1664.36-1985.52)	0.05	22.64 (21.67-23.45)	15.14 (13.74-16.39)	-1.69 (-1.88--1.51)
Portugal	388.91 (358.74-412.84)	911.29 (806.01-1012.29)	1.34	15.95 (14.71-16.93)	23.42 (20.72-26.02)	1.34 (1.2-1.47)
Puerto Rico	46.52 (42.87-50.43)	59.39 (48.29-69.82)	0.28	7.67 (7.07-8.31)	5.09 (4.14-5.98)	-1.8 (-1.99--1.6)
Qatar	1.25 (0.94-1.67)	10.89 (7.2-17.24)	7.71	7.66 (5.73-10.23)	7.11 (4.7-11.26)	-0.07 (-0.4-0.26)
Republic of Korea	2283.79 (1543.67-2858.86)	10776.86 (6531.99-13857.26)	3.72	45.89 (31.02-57.44)	64.44 (39.06-82.86)	1.43 (1.28-1.59)
Republic of Moldova	54.75 (49.88-59.63)	51.06 (46.33-56.9)	-0.07	7.09 (6.46-7.72)	4.84 (4.39-5.39)	-1.22 (-1.57--0.87)
Romania	572.5 (525.99-614.35)	566.86 (490.6-644.8)	-0.01	11.44 (10.51-12.28)	9.44 (8.17-10.74)	-0.39 (-0.7--0.09)
Russian Federation	3399.79 (3267.07-3499.51)	7240.45 (6604.47-7817.17)	1.13	10.77 (10.35-11.09)	17.03 (15.54-18.39)	1.04 (0.64-1.44)
Rwanda	22.59 (14.08-30.15)	41.28 (26.71-58.17)	0.83	4.83 (3.01-6.44)	3.9 (2.53-5.5)	-1.26 (-1.5--1.02)
Saint Kitts and Nevis	0.67 (0.55-0.74)	0.57 (0.47-0.67)	-0.15	10.41 (8.57-11.6)	4.4 (3.61-5.21)	-3.01 (-3.23--2.78)
Saint Lucia	1.11 (0.94-1.24)	1.66 (1.34-2.01)	0.5	7.61 (6.4-8.46)	3.94 (3.19-4.77)	-2.78 (-3.07--2.49)
Saint Vincent and the Grenadines	0.97 (0.88-1.05)	1.01 (0.9-1.16)	0.04	8.05 (7.36-8.77)	3.99 (3.53-4.55)	-2.64 (-2.87--2.41)
Samoa	0.45 (0.28-0.58)	0.69 (0.48-0.92)	0.53	3.1 (1.95-4.02)	2.81 (1.94-3.72)	-0.43 (-0.52--0.35)
San Marino	2 (1.49-2.55)	2.51 (1.6-3.73)	0.25	33.97 (25.41-43.46)	21.25 (13.57-31.51)	-0.68 (-1.1--0.26)
Sao Tome and Principe	0.63 (0.43-0.8)	1.22 (0.77-1.59)	0.94	5.67 (3.87-7.14)	6.65 (4.21-8.7)	0.62 (0.45-0.79)
Saudi Arabia	64.09 (46.14-104.46)	236.66 (176.8-356.45)	2.69	7.19 (5.18-11.72)	7.86 (5.87-11.84)	0.4 (0.27-0.53)
Senegal	0.77 (0.58-1.05)	2.37 (1.42-3.38)	2.08	0.15 (0.11-0.2)	0.18 (0.11-0.26)	1.57 (0.93-2.21)
Serbia	244.22 (165.1-321.67)	355.66 (244.03-473.33)	0.46	11.74 (7.94-15.47)	12.68 (8.7-16.87)	-0.03 (-0.19-0.12)
Seychelles	0.71 (0.41-0.85)	0.88 (0.7-1.28)	0.24	7.43 (4.32-8.91)	4.22 (3.38-6.16)	-2.34 (-2.75--1.94)
Sierra Leone	0.47 (0.33-0.62)	1.06 (0.6-1.45)	1.26	0.14 (0.1-0.19)	0.18 (0.1-0.24)	1.63 (1.07-2.2)
Singapore	35.57 (32.94-38.17)	154.13 (137.17-169.43)	3.33	9.81 (9.09-10.53)	10.15 (9.03-11.16)	-0.08 (-0.22-0.07)
Slovakia	442.6 (323.01-572.25)	822.63 (583.06-1121.91)	0.86	42.66 (31.13-55.16)	50.15 (35.55-68.4)	0.34 (0.17-0.5)
Slovenia	112.24 (101.89-123.29)	261.21 (218.85-305.74)	1.33	26.06 (23.66-28.63)	35.68 (29.89-41.76)	1.25 (1.02-1.49)
Solomon Islands	0.59 (0.3-0.84)	1.3 (0.84-1.86)	1.2	2.61 (1.31-3.73)	2.4 (1.55-3.43)	-0.3 (-0.42--0.17)
Somalia	10.92 (7.04-17.59)	31.3 (17.89-52.25)	1.87	3.03 (1.95-4.88)	3.32 (1.9-5.54)	0.33 (0.29-0.37)
South Africa	90.86 (61.38-131.76)	280.42 (181.38-332.82)	2.09	2.69 (1.82-3.9)	3.55 (2.3-4.22)	0.9 (0.73-1.07)
South Sudan	13 (8.84-18.37)	20.09 (12.42-29.89)	0.55	3.13 (2.13-4.43)	3.23 (2-4.8)	0.06 (-0.06-0.18)
Spain	2882.52 (2611.01-3078.88)	6049.15 (5255.99-6782.06)	1.1	30.15 (27.31-32.2)	39.09 (33.96-43.83)	0.8 (0.59-1.01)
Sri Lanka	192.48 (75.3-257.1)	214.29 (126.58-400.92)	0.11	10.82 (4.23-14.45)	4.45 (2.63-8.32)	-4.52 (-5.34--3.7)
Sudan	55.42 (31.4-113.24)	123.08 (84.39-179.7)	1.22	3.73 (2.11-7.62)	3.95 (2.71-5.77)	0.36 (0.27-0.45)
Suriname	2.53 (1.75-3.1)	4.63 (3.28-6.32)	0.83	5.81 (4.02-7.12)	4.14 (2.94-5.66)	-1.02 (-1.17--0.86)
Sweden	973.11 (885.64-1044.33)	620.49 (534.87-697.34)	-0.36	40.99 (37.3-43.99)	18.43 (15.89-20.71)	-2.89 (-3.53--2.25)
Switzerland	400.62 (355.65-440.87)	1144.27 (955.87-1328.23)	1.86	23.72 (21.05-26.1)	39.04 (32.61-45.32)	1.16 (0.64-1.68)
Syrian Arab Republic	2.76 (2.07-3.86)	9.89 (5.69-13.25)	2.58	0.31 (0.24-0.44)	0.42 (0.24-0.56)	1.18 (0.9-1.46)
Taiwan (Province of China)	405.29 (369.55-433.89)	1647.45 (1461.72-1826.27)	3.06	14.61 (13.32-15.64)	21.88 (19.41-24.25)	0.13 (-0.74-1.01)
Tajikistan	3.81 (2.37-5.74)	4.83 (3.3-6.73)	0.27	0.81 (0.51-1.23)	0.47 (0.32-0.66)	-2.11 (-2.42--1.8)
Thailand	1721.35 (1064.43-2240.66)	7889.88 (3924.68-10840.82)	3.58	29.01 (17.94-37.76)	40.59 (20.19-55.77)	0.95 (0.87-1.04)
Timor-Leste	1.39 (0.91-2.49)	4.27 (2.73-9.15)	2.07	3.21 (2.09-5.74)	3.01 (1.93-6.44)	-0.13 (-0.39-0.13)
Togo	0.29 (0.21-0.4)	1.16 (0.68-1.69)	3	0.15 (0.11-0.2)	0.19 (0.11-0.27)	1.59 (0.92-2.26)
Tokelau	0.01 (0.01-0.01)	0.01 (0-0.01)	0	3.33 (2.2-4.35)	2.72 (1.89-3.69)	-0.72 (-0.79--0.65)
Tonga	0.23 (0.14-0.31)	0.31 (0.21-0.44)	0.35	2.4 (1.48-3.25)	2.3 (1.57-3.26)	-0.19 (-0.33--0.05)
Trinidad and Tobago	13.07 (12.25-13.91)	17.08 (13.29-21.68)	0.31	9.52 (8.92-10.13)	4.9 (3.82-6.22)	-2.69 (-3.06--2.32)
Tunisia	92.01 (62.64-116.65)	289.91 (189.87-401.28)	2.15	10.57 (7.19-13.4)	12.4 (8.12-17.17)	0.34 (0.26-0.42)
Turkey	519.89 (365-656.56)	1326.23 (988.73-1786.64)	1.55	8.7 (6.11-10.99)	8.03 (5.98-10.81)	-0.41 (-0.58--0.24)
Turkmenistan	40.62 (35.51-46.37)	24.71 (18.85-32.37)	-0.39	12.51 (10.93-14.28)	3.49 (2.66-4.57)	-5.29 (-6.46--4.11)
Tuvalu	0.04 (0.02-0.05)	0.05 (0.03-0.06)	0.25	3.16 (1.88-4.35)	2.61 (1.83-3.4)	-0.82 (-0.9--0.74)
Uganda	32.76 (22.88-43.54)	78.45 (53.25-111.41)	1.39	3.13 (2.19-4.16)	3.31 (2.25-4.7)	-0.15 (-0.34-0.04)
Ukraine	775.52 (596.79-1032.37)	911.76 (681.07-1166.79)	0.18	6.22 (4.79-8.28)	6.71 (5.02-8.59)	0.48 (0.18-0.78)
United Arab Emirates	12.9 (7.73-18.76)	70.51 (51.07-99.94)	4.47	22.98 (13.77-33.43)	9.82 (7.11-13.92)	-1.7 (-2.11--1.29)
United Kingdom	2661.44 (2528.26-2739.44)	7098.19 (6422.28-7441)	1.67	17.92 (17.02-18.44)	33.75 (30.54-35.38)	2.88 (2.53-3.24)
United Republic of Tanzania	62.98 (44.55-81.87)	144.28 (94.7-198.76)	1.29	3.49 (2.47-4.54)	3.5 (2.3-4.82)	0.09 (0.04-0.14)
United States of America	13691.94 (12637.64-14228.54)	27073.44 (24593.47-28496.51)	0.98	26.1 (24.09-27.12)	27.01 (24.53-28.43)	-0.12 (-0.23--0.01)
United States Virgin Islands	1.38 (0.79-1.74)	1.53 (1.09-2.17)	0.11	9.87 (5.66-12.44)	4.77 (3.38-6.73)	-2.83 (-3.2--2.45)
Uruguay	201.23 (186.51-216)	240.84 (217.43-264.15)	0.2	29.82 (27.64-32.01)	26.63 (24.04-29.21)	-0.65 (-0.78--0.52)
Uzbekistan	22.2 (14.91-33.34)	76.98 (59.07-98.82)	2.47	1.13 (0.76-1.7)	1.66 (1.27-2.13)	1.2 (0.65-1.74)
Vanuatu	0.25 (0.14-0.33)	0.62 (0.43-0.85)	1.48	2.48 (1.44-3.33)	2.17 (1.5-2.95)	-0.64 (-0.75--0.53)
Venezuela (Bolivarian Republic of)	280.31 (266.19-292.71)	413.24 (308.45-531.67)	0.47	17.9 (17-18.69)	7.9 (5.9-10.16)	-3.03 (-3.38--2.67)
Viet Nam	331.65 (251.91-449.18)	1115.42 (758.01-1655.39)	2.36	4.76 (3.61-6.44)	6.39 (4.34-9.48)	0.89 (0.8-0.97)
Yemen	30.83 (18.39-57.43)	99.96 (64.09-148.56)	2.24	3.84 (2.29-7.16)	4.44 (2.85-6.61)	0.68 (0.55-0.8)
Zambia	16.05 (10.85-20.84)	41.64 (25.72-56.04)	1.59	3.49 (2.36-4.53)	3.86 (2.38-5.19)	0.28 (0.19-0.36)
Zimbabwe	29.57 (20.99-37.98)	54.01 (37.64-75.8)	0.83	4.46 (3.17-5.73)	4.88 (3.4-6.85)	0.69 (0.39-1)

## Sheet: Table S5
The deaths of GBTC cases and rates aged 55 years and above in 1990 and 2021 across 204 countries, and the trends from 1990 to 2021.
location		Death cases			Death rates
	1990_number(95%UI)	2021_number(95%UI)	percentage change(100%)	1990_per 100000(95%UI)	2021_per 100000(95%UI)	EAPC(95% CI)
Afghanistan	80.8 (33.89-161.61)	111.97 (57.45-173.25)	0.39	6.65 (2.79-13.3)	9.11 (4.68-14.1)	1.56 (1.4-1.71)
Albania	26.47 (18.79-36.53)	54.21 (36.35-78.89)	1.05	7.63 (5.41-10.53)	6.89 (4.62-10.03)	0.14 (-0.05-0.34)
Algeria	346.15 (237.56-456.97)	860.78 (616.72-1118.79)	1.49	16.52 (11.34-21.81)	14.17 (10.15-18.42)	-0.37 (-0.43--0.3)
American Samoa	0.11 (0.08-0.14)	0.19 (0.15-0.29)	0.73	2.95 (2.2-3.85)	2.23 (1.73-3.44)	-0.87 (-1.31--0.42)
Andorra	1.45 (1-2.07)	2.62 (1.78-3.6)	0.81	14.7 (10.16-20.98)	9.91 (6.73-13.59)	-0.98 (-1.21--0.74)
Angola	9.18 (5.93-13.41)	32.58 (21.72-44.8)	2.55	1.47 (0.95-2.15)	1.69 (1.12-2.32)	0.67 (0.54-0.79)
Antigua and Barbuda	1.19 (1.08-1.31)	1.04 (0.97-1.11)	-0.13	13.73 (12.53-15.15)	5.49 (5.15-5.86)	-3.48 (-3.81--3.16)
Argentina	1858.61 (1723.99-1965.52)	1594.37 (1456.06-1705.64)	-0.14	33.4 (30.98-35.32)	17.08 (15.6-18.27)	-2.11 (-2.23--1.98)
Armenia	17.64 (14.86-21.33)	65.72 (55.04-77.09)	2.73	3.62 (3.05-4.38)	8.35 (7-9.8)	3.37 (2.69-4.06)
Australia	322.9 (302.83-340.52)	458.44 (397.36-498.43)	0.42	9.84 (9.23-10.38)	6.19 (5.36-6.73)	-1.8 (-1.93--1.66)
Austria	517.48 (472.15-549.86)	314.13 (272.96-342.94)	-0.39	26.59 (24.26-28.26)	10.63 (9.24-11.6)	-2.91 (-3.17--2.66)
Azerbaijan	35.83 (22.77-52.62)	57.78 (33.76-86.65)	0.61	4.11 (2.61-6.03)	3.02 (1.76-4.52)	-0.98 (-1.28--0.67)
Bahamas	2.93 (2.63-3.2)	4.82 (3.97-5.83)	0.65	11.93 (10.72-13.02)	6.7 (5.51-8.1)	-2.07 (-2.22--1.92)
Bahrain	1.33 (1-1.75)	4.77 (3.11-6.58)	2.59	4.73 (3.58-6.25)	2.94 (1.92-4.05)	-1.93 (-2.25--1.62)
Bangladesh	657.62 (489.88-981.53)	2170.45 (1467.13-3342.12)	2.3	8.68 (6.47-12.96)	9.29 (6.28-14.3)	0.23 (0.11-0.34)
Barbados	5.29 (4.8-5.77)	6.38 (4.98-7.86)	0.21	11.28 (10.23-12.3)	7 (5.46-8.62)	-1.76 (-1.95--1.56)
Belarus	142.74 (128.79-158.29)	203.76 (165.48-247.31)	0.43	6.17 (5.56-6.84)	7.08 (5.75-8.6)	0.37 (0.09-0.66)
Belgium	293.14 (264.01-315.26)	207.78 (177.35-230.66)	-0.29	11.18 (10.07-12.02)	5.5 (4.69-6.1)	-2.4 (-2.62--2.19)
Belize	1.4 (1.21-1.61)	2.41 (2.12-2.72)	0.72	9.11 (7.84-10.46)	4.81 (4.22-5.43)	-2.56 (-2.97--2.14)
Benin	0.58 (0.46-0.84)	1.71 (0.93-2.33)	1.95	0.18 (0.14-0.26)	0.21 (0.11-0.28)	1.28 (0.71-1.85)
Bermuda	0.93 (0.74-1.06)	0.79 (0.66-0.97)	-0.15	8.79 (6.96-10)	3.38 (2.85-4.17)	-3.58 (-3.82--3.34)
Bhutan	3.46 (2.27-5.63)	11.39 (7.89-16.09)	2.29	8.72 (5.71-14.19)	11.44 (7.92-16.16)	0.86 (0.8-0.91)
Bolivia (Plurinational State of)	200.7 (118.03-273.07)	446.8 (288.89-636.11)	1.23	38.28 (22.51-52.08)	28.91 (18.69-41.16)	-0.96 (-1.03--0.89)
Bosnia and Herzegovina	180.52 (115.72-214.37)	187.56 (137.86-315.81)	0.04	24.61 (15.78-29.22)	17.12 (12.59-28.83)	-1.5 (-1.66--1.34)
Botswana	2.83 (1.94-4.14)	7.29 (5.15-10.93)	1.58	3.04 (2.09-4.46)	3.01 (2.12-4.51)	0.32 (0.03-0.62)
Brazil	2333.14 (2184.93-2428.44)	4983.33 (4510.07-5262.28)	1.14	15.79 (14.78-16.43)	11.51 (10.41-12.15)	-1.19 (-1.31--1.07)
Brunei Darussalam	3.05 (2.24-3.84)	6.27 (4.86-8.1)	1.06	19.49 (14.29-24.53)	10.47 (8.12-13.53)	-1.8 (-1.91--1.7)
Bulgaria	174.36 (158.19-189.97)	184.37 (155.43-218.39)	0.06	7.7 (6.99-8.39)	7.76 (6.54-9.19)	-0.05 (-0.35-0.25)
Burkina Faso	1.4 (1.05-1.88)	3.77 (1.99-5.13)	1.69	0.19 (0.15-0.26)	0.25 (0.13-0.34)	1.66 (1.08-2.24)
Burundi	19.63 (11.67-27.99)	27.68 (15.87-40.24)	0.41	5.22 (3.1-7.44)	3.46 (1.98-5.03)	-1.78 (-1.94--1.63)
Cabo Verde	0.26 (0.19-0.5)	1.43 (0.51-1.9)	4.5	0.66 (0.49-1.25)	1.86 (0.67-2.48)	3.45 (2.5-4.42)
Cambodia	38.5 (24.47-67.68)	105.02 (66.94-225.64)	1.73	5.2 (3.3-9.13)	4.83 (3.08-10.38)	-0.35 (-0.55--0.15)
Cameroon	1.48 (1.18-2)	4.84 (2.58-6.91)	2.27	0.2 (0.16-0.27)	0.24 (0.13-0.34)	1.47 (0.89-2.04)
Canada	603.66 (556.9-641.91)	707.7 (609.8-772.1)	0.17	11.06 (10.2-11.76)	5.77 (4.97-6.29)	-2.14 (-2.23--2.04)
Central African Republic	3.19 (2.09-4.92)	5.35 (3.34-8.81)	0.68	1.69 (1.1-2.61)	1.5 (0.93-2.46)	-0.34 (-0.42--0.27)
Chad	0.74 (0.55-1.09)	1.96 (1.2-2.58)	1.65	0.16 (0.12-0.24)	0.21 (0.13-0.28)	1.8 (1.29-2.31)
Chile	1453.59 (1367.51-1554.68)	1808.76 (1626.69-1978.87)	0.24	86.44 (81.32-92.45)	40.39 (36.33-44.19)	-2.73 (-2.94--2.51)
China	14264.14 (11135.06-18680.54)	33806.27 (23680.66-43754.8)	1.37	9.94 (7.76-13.02)	8.92 (6.25-11.55)	-0.41 (-0.52--0.3)
Colombia	630.46 (589.64-675.33)	1180.26 (982.63-1381.27)	0.87	21.9 (20.48-23.46)	12.34 (10.27-14.44)	-2.04 (-2.23--1.86)
Comoros	1.23 (0.82-1.66)	3.25 (2.04-4.98)	1.64	3.78 (2.52-5.11)	4.02 (2.52-6.16)	0.23 (0.19-0.27)
Congo	3.52 (2.38-5.03)	8.09 (5.33-10.68)	1.3	1.98 (1.34-2.82)	1.86 (1.23-2.46)	-0.17 (-0.24--0.11)
Cook Islands	0.08 (0.04-0.1)	0.11 (0.08-0.17)	0.38	3.52 (1.87-4.57)	2.41 (1.62-3.64)	-1.43 (-1.6--1.26)
Costa Rica	57.11 (52.02-61.14)	91.45 (79.97-103.07)	0.6	20.08 (18.29-21.5)	9.55 (8.35-10.76)	-3.15 (-3.46--2.84)
Cote d'Ivoire	1.03 (0.79-1.35)	3.83 (2.02-5.1)	2.72	0.16 (0.12-0.21)	0.21 (0.11-0.28)	1.77 (1.25-2.29)
Croatia	206.03 (187.32-223.87)	249.85 (212.8-288.71)	0.21	18.51 (16.83-20.11)	16.75 (14.27-19.36)	-0.3 (-0.47--0.14)
Cuba	154.96 (142.61-167.09)	166.98 (144.15-188.01)	0.08	9.14 (8.42-9.86)	4.89 (4.22-5.5)	-2.22 (-2.38--2.07)
Cyprus	19.98 (14.25-25.19)	26.71 (19.59-35.8)	0.34	14.3 (10.2-18.03)	7.64 (5.6-10.24)	-2.21 (-2.31--2.12)
Czechia	1016.08 (912.99-1121.44)	787.58 (661.94-924.92)	-0.22	42.91 (38.56-47.36)	22.54 (18.95-26.48)	-2.48 (-2.62--2.33)
Democratic People's Republic of Korea	211.23 (143.13-356.14)	382.49 (258.39-692.68)	0.81	7.94 (5.38-13.38)	6.79 (4.58-12.29)	-0.12 (-0.28-0.04)
Democratic Republic of the Congo	35.44 (24.05-52.3)	85.31 (53.44-130.25)	1.41	1.34 (0.91-1.98)	1.41 (0.88-2.16)	0.22 (0.16-0.27)
Denmark	114.31 (102.76-124.23)	127.16 (113-138.65)	0.11	8.76 (7.88-9.52)	6.6 (5.87-7.2)	-1.45 (-1.7--1.2)
Djibouti	0.71 (0.48-1.05)	3.61 (2.13-5.89)	4.08	3.31 (2.22-4.91)	3.48 (2.05-5.68)	0.16 (0.12-0.2)
Dominica	1.23 (0.82-1.71)	1.26 (0.93-1.57)	0.02	12.51 (8.36-17.46)	8.32 (6.13-10.39)	-1.56 (-1.68--1.44)
Dominican Republic	31.99 (18.41-39.91)	70 (52.53-101.05)	1.19	5.23 (3.01-6.53)	4.19 (3.14-6.05)	-0.42 (-0.57--0.27)
Ecuador	217.22 (204.21-229.65)	435.06 (347.05-538.09)	1	25.26 (23.75-26.71)	15.72 (12.54-19.44)	-1.38 (-1.53--1.24)
Egypt	200.45 (166.05-338.47)	639.55 (450.25-794.54)	2.19	4.48 (3.71-7.57)	5.78 (4.07-7.18)	1.48 (1.17-1.79)
El Salvador	72.86 (53.58-88.39)	136.53 (105.19-194.09)	0.87	14.9 (10.96-18.08)	13.35 (10.29-18.98)	-0.68 (-0.85--0.51)
Equatorial Guinea	0.52 (0.34-0.79)	1.4 (0.87-2.1)	1.69	1.62 (1.06-2.49)	1.77 (1.1-2.66)	0.57 (0.46-0.68)
Eritrea	6.85 (4.45-10.45)	19.69 (11.65-28.88)	1.87	3.88 (2.52-5.91)	4.47 (2.64-6.55)	0.55 (0.47-0.62)
Estonia	39.32 (36.21-42.72)	47.45 (40.84-53.88)	0.21	10.97 (10.1-11.92)	10.85 (9.34-12.32)	-0.33 (-0.55--0.11)
Eswatini	1.49 (1.06-2.2)	3.89 (2.48-5.82)	1.61	3.3 (2.35-4.87)	4.3 (2.74-6.43)	1.21 (0.88-1.53)
Ethiopia	287.06 (173.16-456.19)	465.72 (321.05-658.29)	0.62	8.93 (5.39-14.2)	6.8 (4.69-9.62)	-1.18 (-1.37--0.98)
Fiji	2.51 (1.84-3.3)	6.6 (3.87-8.93)	1.63	4.45 (3.26-5.86)	4.83 (2.83-6.53)	0.47 (0.28-0.66)
Finland	221.95 (200.59-236.72)	244.41 (209.73-270.37)	0.1	18.69 (16.89-19.94)	12.14 (10.42-13.43)	-1.75 (-2.11--1.39)
France	2114.88 (1921.77-2243.19)	1510.17 (1280.67-1708.45)	-0.29	15.2 (13.81-16.12)	6.83 (5.79-7.73)	-2.83 (-2.95--2.7)
Gabon	2.16 (1.5-2.96)	3.42 (2.23-4.6)	0.58	2.21 (1.54-3.03)	1.91 (1.25-2.57)	-0.54 (-0.72--0.35)
Gambia	0 (0-0)	0 (0-0)	NA	0 (0-0)	0 (0-0)	0 (0-0)
Georgia	104.33 (85.39-126.12)	88.95 (72.74-106.98)	-0.15	9.39 (7.69-11.35)	8.47 (6.93-10.19)	-1.06 (-2.12-0.01)
Germany	6302.88 (5788.66-6679.03)	4116.13 (3555.58-4490.94)	-0.35	30.04 (27.59-31.83)	13.06 (11.28-14.25)	-2.7 (-3.11--2.29)
Ghana	1.57 (1.18-2.13)	6.6 (3.72-8.71)	3.2	0.15 (0.12-0.21)	0.24 (0.14-0.32)	2.49 (1.86-3.12)
Greece	273 (254.23-287.33)	344.42 (306.91-370.63)	0.26	10.21 (9.51-10.75)	9.37 (8.35-10.08)	0.01 (-0.66-0.68)
Greenland	0.92 (0.57-1.13)	0.94 (0.68-1.33)	0.02	16.78 (10.32-20.45)	6.94 (5.04-9.77)	-2.7 (-2.92--2.48)
Grenada	1.39 (1.21-1.6)	1.35 (1.17-1.54)	-0.03	11.54 (10.03-13.28)	6.73 (5.84-7.67)	-1.97 (-2.11--1.84)
Guam	0.27 (0.19-0.33)	0.46 (0.34-0.65)	0.7	2.11 (1.49-2.56)	1.23 (0.91-1.71)	-1.26 (-1.46--1.06)
Guatemala	126.74 (120.62-132.65)	148.23 (128.99-170)	0.17	22.04 (20.97-23.07)	8.1 (7.05-9.29)	-4.07 (-4.38--3.76)
Guinea	0.94 (0.69-1.39)	2.03 (1.12-2.85)	1.16	0.17 (0.13-0.25)	0.22 (0.12-0.31)	1.73 (1.27-2.19)
Guinea-Bissau	0.14 (0.09-0.2)	0.3 (0.19-0.42)	1.14	0.22 (0.15-0.31)	0.26 (0.16-0.37)	1.45 (0.88-2.02)
Guyana	5.17 (4.54-5.8)	5.62 (4.43-7.06)	0.09	8.43 (7.41-9.46)	4.99 (3.94-6.27)	-1.88 (-2.11--1.65)
Haiti	52.75 (29.49-78.61)	83.21 (52.18-125.63)	0.58	9.78 (5.47-14.57)	7.02 (4.4-10.6)	-1.03 (-1.07--0.98)
Honduras	38.01 (28.84-47.61)	173.49 (118.37-232.19)	3.56	11.4 (8.65-14.28)	16.5 (11.26-22.08)	1.25 (1.06-1.44)
Hungary	1028.16 (943.6-1094.54)	557.01 (487.9-626.48)	-0.46	39.92 (36.63-42.49)	17.52 (15.34-19.7)	-2.96 (-3.11--2.81)
Iceland	4.71 (4.29-5.07)	5.56 (4.74-6.27)	0.18	9.87 (8.99-10.64)	5.71 (4.87-6.44)	-1.85 (-1.93--1.77)
India	5502.03 (4518.65-8169.31)	22728.19 (15623.51-26747.76)	3.13	7.18 (5.89-10.66)	11.31 (7.77-13.3)	1.6 (1.53-1.67)
Indonesia	573.33 (385.59-1015.96)	1294.49 (843.32-2838.34)	1.26	3.55 (2.39-6.29)	3.09 (2.01-6.78)	-0.55 (-0.63--0.48)
Iran (Islamic Republic of)	97.78 (74.84-138.26)	500 (274.54-580.14)	4.11	2.12 (1.62-3)	3.85 (2.11-4.47)	3.16 (2.63-3.69)
Iraq	65.2 (48.22-90.8)	181.17 (125.32-232.55)	1.78	5.16 (3.82-7.19)	4.66 (3.23-5.99)	-0.37 (-0.54--0.2)
Ireland	71.65 (66.65-76.27)	58.92 (50.33-65.2)	-0.18	10.53 (9.79-11.2)	4.49 (3.84-4.97)	-3.15 (-3.47--2.82)
Israel	86.7 (78.77-93.83)	101.26 (87.98-112.89)	0.17	10.7 (9.72-11.58)	5.07 (4.4-5.65)	-2.86 (-3.07--2.65)
Italy	3121.15 (2878.14-3267.31)	3888.85 (3345.85-4244.04)	0.25	20.51 (18.91-21.47)	17.12 (14.73-18.68)	-0.69 (-0.81--0.57)
Jamaica	23.66 (21.33-26.27)	29.37 (22.9-37.04)	0.24	8.03 (7.24-8.92)	5.55 (4.33-7)	-1.46 (-1.71--1.21)
Japan	12491.13 (11473.21-13032.28)	21785.91 (17686.82-24177.97)	0.74	42.18 (38.74-44.01)	41.73 (33.88-46.32)	-0.14 (-0.24--0.03)
Jordan	17.04 (12.65-21.83)	63.84 (43.58-89.48)	2.75	7.92 (5.88-10.15)	5.08 (3.47-7.12)	-1.36 (-1.7--1.03)
Kazakhstan	136.24 (107.88-184.32)	159.16 (131.49-188.66)	0.17	6.51 (5.16-8.81)	5.02 (4.14-5.94)	-1.09 (-1.37--0.8)
Kenya	65.5 (49.3-102.01)	203.18 (145.18-289.96)	2.1	4.91 (3.7-7.65)	5.43 (3.88-7.75)	0.65 (0.52-0.78)
Kiribati	0.16 (0.09-0.2)	0.32 (0.16-0.43)	1	2.69 (1.43-3.41)	2.55 (1.28-3.42)	-0.18 (-0.31--0.04)
Kuwait	6.94 (6.28-7.54)	20.13 (16.32-24.13)	1.9	7.58 (6.87-8.25)	4.32 (3.5-5.18)	-1.37 (-2.36--0.37)
Kyrgyzstan	29.41 (25.12-34.5)	40.58 (33.09-49.08)	0.38	5.71 (4.88-6.7)	4.8 (3.91-5.8)	-2.66 (-3.78--1.52)
Lao People's Democratic Republic	18.56 (10.33-31.24)	30.02 (18.99-67.18)	0.62	5.41 (3.01-9.11)	3.88 (2.46-8.69)	-1.19 (-1.3--1.09)
Latvia	39.04 (35.94-42.05)	49.43 (42.73-56.35)	0.27	6.24 (5.75-6.73)	7.51 (6.49-8.56)	0.39 (0.23-0.55)
Lebanon	33.3 (19.71-43.85)	81.76 (49.83-107.82)	1.46	8.78 (5.2-11.57)	8.34 (5.08-11)	0.31 (0.07-0.55)
Lesotho	3.68 (2.5-5.9)	8.2 (5.48-12.27)	1.23	2.63 (1.79-4.22)	4.54 (3.04-6.8)	2.46 (2.1-2.82)
Liberia	0.35 (0.27-0.47)	0.65 (0.34-0.93)	0.86	0.19 (0.14-0.25)	0.2 (0.1-0.28)	1.11 (0.52-1.7)
Libya	53.29 (39.94-73.59)	136.04 (91.07-183.19)	1.55	17.13 (12.84-23.66)	16.27 (10.89-21.9)	0.35 (0.11-0.59)
Lithuania	77.52 (70.9-83.38)	106.53 (92.9-120.9)	0.37	9.78 (8.95-10.52)	11.01 (9.6-12.49)	-0.15 (-0.6-0.3)
Luxembourg	11.86 (11.06-12.55)	10.49 (9.18-11.72)	-0.12	12.7 (11.84-13.44)	5.9 (5.16-6.59)	-2.28 (-2.44--2.13)
Madagascar	28.22 (19.96-36.48)	52.15 (32.03-71.94)	0.85	3.34 (2.36-4.32)	2.82 (1.73-3.9)	-0.61 (-0.67--0.55)
Malawi	7.91 (5.38-10.19)	15.06 (9.18-21.75)	0.9	1.26 (0.86-1.62)	1.29 (0.79-1.86)	-0.13 (-0.29-0.03)
Malaysia	95.29 (54.46-116.44)	258.67 (166.91-317.74)	1.71	6.46 (3.69-7.89)	5.28 (3.4-6.48)	-1.11 (-1.32--0.89)
Maldives	0.72 (0.38-0.99)	1.41 (0.95-1.81)	0.96	4.71 (2.46-6.49)	2.6 (1.75-3.34)	-2.12 (-2.29--1.96)
Mali	7.44 (5.77-11.07)	16.61 (11.78-25.42)	1.23	1.11 (0.86-1.66)	1.15 (0.81-1.76)	0.77 (0.49-1.04)
Malta	5.83 (5.3-6.31)	7.39 (6.39-8.25)	0.27	8.05 (7.31-8.72)	4.68 (4.05-5.23)	-2.23 (-2.4--2.05)
Marshall Islands	0.09 (0.05-0.12)	0.16 (0.1-0.22)	0.78	3.6 (2.13-4.8)	2.66 (1.73-3.7)	-1.32 (-1.43--1.22)
Mauritania	0.34 (0.25-0.46)	0.77 (0.43-1.13)	1.26	0.2 (0.15-0.28)	0.22 (0.12-0.31)	0.91 (0.31-1.51)
Mauritius	10.57 (10.02-11.16)	12.85 (11.84-13.74)	0.22	8.69 (8.24-9.17)	3.8 (3.5-4.06)	-4.29 (-5.85--2.71)
Mexico	1666.92 (1611.28-1707.82)	2324.27 (2057.74-2600.56)	0.39	23.98 (23.17-24.56)	10.79 (9.55-12.07)	-2.93 (-3.09--2.76)
Micronesia (Federated States of)	0.33 (0.2-0.44)	0.37 (0.24-0.5)	0.12	4.15 (2.54-5.5)	2.77 (1.84-3.83)	-1.59 (-1.68--1.5)
Monaco	0.52 (0.34-0.67)	0.61 (0.45-0.82)	0.17	4.72 (3.05-6.04)	3.88 (2.88-5.25)	-0.64 (-0.7--0.58)
Mongolia	28.49 (18.73-43.44)	48.46 (34.7-73.19)	0.7	16.44 (10.81-25.07)	12.27 (8.79-18.54)	-1.08 (-1.21--0.96)
Montenegro	7.96 (5.68-10.44)	14.21 (10.27-19.02)	0.79	7.3 (5.21-9.59)	8.15 (5.89-10.91)	0.41 (0.22-0.61)
Morocco	77.98 (45.94-96.83)	197.27 (114.12-250.54)	1.53	3.33 (1.96-4.13)	3.28 (1.9-4.17)	0.08 (0.02-0.15)
Mozambique	34.32 (21.82-48.03)	76.07 (42.86-111.58)	1.22	3.51 (2.23-4.92)	4.25 (2.4-6.24)	0.98 (0.85-1.1)
Myanmar	179.26 (112.85-313.74)	281.47 (184.21-596.74)	0.57	4.58 (2.88-8.01)	3.33 (2.18-7.07)	-1.23 (-1.32--1.14)
Namibia	2.65 (1.9-3.49)	5.86 (3.9-8.22)	1.21	2.45 (1.75-3.21)	2.6 (1.73-3.64)	-0.03 (-0.29-0.23)
Nauru	0.03 (0.02-0.04)	0.04 (0.02-0.05)	0.33	4.46 (2.73-6.13)	3.85 (2.28-5.42)	-0.73 (-0.87--0.58)
Nepal	123.14 (87.99-196.04)	426.05 (311.68-582.51)	2.46	8 (5.72-12.74)	10.76 (7.87-14.72)	1.09 (0.94-1.24)
Netherlands	516.1 (472.03-546.2)	501.53 (440.14-551.7)	-0.03	15.59 (14.26-16.5)	8.57 (7.52-9.43)	-1.85 (-2.13--1.56)
New Zealand	58.89 (53.76-62.94)	133.19 (116.64-145.29)	1.26	8.95 (8.17-9.57)	9.34 (8.18-10.19)	-0.18 (-0.66-0.3)
Nicaragua	38.19 (24.89-45.54)	85.27 (66.36-133.18)	1.23	15.37 (10.02-18.33)	10.48 (8.15-16.36)	-1.32 (-1.49--1.14)
Niger	0.64 (0.49-0.94)	2.47 (1.42-3.58)	2.86	0.15 (0.11-0.21)	0.18 (0.1-0.26)	1.35 (0.7-1.99)
Nigeria	13.57 (10.23-19.56)	30.34 (21.46-43.08)	1.24	0.19 (0.14-0.27)	0.2 (0.14-0.29)	0.67 (0.43-0.91)
Niue	0.02 (0.01-0.02)	0.01 (0.01-0.02)	-0.5	4.36 (2.78-5.42)	3.12 (2.18-3.92)	-1.03 (-1.08--0.98)
North Macedonia	46.6 (35.11-60.34)	72 (53-92.43)	0.55	14.17 (10.67-18.34)	12.14 (8.94-15.59)	-0.71 (-0.92--0.49)
Northern Mariana Islands	0.04 (0.03-0.08)	0.16 (0.13-0.29)	3	1.77 (1.32-3.36)	1.65 (1.31-2.95)	-0.21 (-0.79-0.38)
Norway	99.01 (91.78-104.01)	96.91 (84.54-104.51)	-0.02	9.14 (8.48-9.6)	5.98 (5.21-6.44)	-1.98 (-2.3--1.67)
Oman	4.78 (3.17-6.42)	8.95 (6.31-11.87)	0.87	4.75 (3.15-6.38)	2.87 (2.02-3.8)	-1.18 (-1.4--0.95)
Pakistan	1326.86 (1015.19-1802.26)	3086.78 (2237.24-4109.86)	1.33	14.55 (11.13-19.76)	15.57 (11.28-20.73)	-0.11 (-0.33-0.1)
Palau	0.04 (0.03-0.05)	0.08 (0.05-0.11)	1	2.36 (1.57-3.29)	1.87 (1.24-2.7)	-0.88 (-0.97--0.78)
Palestine	11.94 (7.89-15.43)	24.49 (15.51-30.52)	1.05	8.23 (5.43-10.63)	5.69 (3.6-7.09)	-1.01 (-1.25--0.78)
Panama	33.32 (30.76-35.8)	46.88 (37.15-55.91)	0.41	13.75 (12.7-14.78)	6.3 (5-7.52)	-2.53 (-2.69--2.36)
Papua New Guinea	7.48 (4.19-10.47)	16.27 (10.89-23.06)	1.18	2.53 (1.41-3.54)	1.98 (1.33-2.81)	-1.01 (-1.1--0.92)
Paraguay	36.63 (26.82-45.98)	94.65 (65.84-131.13)	1.58	10.1 (7.39-12.67)	9.56 (6.65-13.24)	-0.21 (-0.31--0.12)
Peru	458.66 (326.16-549.45)	1177.24 (820.92-1642.26)	1.57	23.26 (16.54-27.87)	21.05 (14.68-29.36)	-0.64 (-0.89--0.39)
Philippines	101.03 (79.61-171.8)	323.63 (254.05-581.98)	2.2	2.12 (1.67-3.6)	2.32 (1.82-4.17)	0.34 (0.31-0.38)
Poland	2109.54 (2009.47-2187.76)	2124.92 (1914.07-2303.29)	0.01	27.38 (26.08-28.39)	17.54 (15.8-19.01)	-1.9 (-2.09--1.72)
Portugal	329.07 (303.71-348.84)	359.15 (312.7-394.87)	0.09	13.5 (12.46-14.31)	9.23 (8.04-10.15)	-1.36 (-1.5--1.22)
Puerto Rico	45.95 (42.41-49.69)	43.94 (36.05-51.68)	-0.04	7.57 (6.99-8.19)	3.76 (3.09-4.43)	-2.86 (-3.09--2.63)
Qatar	1.22 (0.91-1.61)	5.99 (4.06-9.12)	3.91	7.45 (5.56-9.84)	3.91 (2.65-5.95)	-2.06 (-2.48--1.64)
Republic of Korea	2386.85 (1648.06-2964.96)	5364.4 (3321.69-6829.1)	1.25	47.96 (33.12-59.58)	32.08 (19.86-40.83)	-1.39 (-1.48--1.29)
Republic of Moldova	56.25 (50.92-61.2)	47.88 (43.14-53.38)	-0.15	7.29 (6.6-7.93)	4.54 (4.09-5.06)	-1.48 (-1.76--1.2)
Romania	604.9 (555.45-650.37)	542.86 (472.89-616.34)	-0.1	12.09 (11.1-13)	9.04 (7.87-10.26)	-0.73 (-1.02--0.45)
Russian Federation	2652.22 (2544.62-2730.21)	3190.42 (2920.91-3449.43)	0.2	8.4 (8.06-8.65)	7.51 (6.87-8.12)	-1.05 (-1.43--0.67)
Rwanda	26.2 (16.46-34.92)	46.15 (29.97-64.19)	0.76	5.6 (3.52-7.46)	4.36 (2.83-6.07)	-1.54 (-1.8--1.28)
Saint Kitts and Nevis	0.81 (0.67-0.9)	0.57 (0.47-0.67)	-0.3	12.69 (10.43-14.06)	4.41 (3.65-5.16)	-3.7 (-3.98--3.42)
Saint Lucia	1.28 (1.08-1.42)	1.71 (1.4-2.05)	0.34	8.77 (7.4-9.73)	4.07 (3.33-4.87)	-3.12 (-3.43--2.81)
Saint Vincent and the Grenadines	1.1 (1.01-1.2)	1.08 (0.95-1.22)	-0.02	9.18 (8.41-10)	4.24 (3.75-4.8)	-2.83 (-3.04--2.61)
Samoa	0.5 (0.31-0.64)	0.72 (0.49-0.95)	0.44	3.46 (2.17-4.46)	2.93 (2.01-3.88)	-0.62 (-0.73--0.52)
San Marino	1.02 (0.75-1.3)	1.02 (0.66-1.49)	0	17.35 (12.84-22.12)	8.61 (5.54-12.6)	-1.38 (-1.76--1)
Sao Tome and Principe	0.73 (0.5-0.91)	1.3 (0.84-1.7)	0.78	6.5 (4.49-8.1)	7.11 (4.58-9.29)	0.47 (0.24-0.69)
Saudi Arabia	70.84 (51.27-116.74)	179.13 (134.3-264.52)	1.53	7.95 (5.75-13.1)	5.95 (4.46-8.79)	-0.84 (-1.07--0.61)
Senegal	0.9 (0.68-1.23)	2.9 (1.65-4.16)	2.22	0.17 (0.13-0.23)	0.22 (0.13-0.32)	1.78 (1.16-2.41)
Serbia	280.89 (191.47-370.49)	359.28 (252.35-478.68)	0.28	13.51 (9.21-17.81)	12.81 (9-17.06)	-0.49 (-0.69--0.28)
Seychelles	0.81 (0.47-0.97)	0.85 (0.69-1.23)	0.05	8.49 (4.91-10.16)	4.11 (3.33-5.95)	-2.85 (-3.27--2.43)
Sierra Leone	0.56 (0.41-0.76)	1.31 (0.7-1.82)	1.34	0.17 (0.12-0.23)	0.22 (0.12-0.3)	1.74 (1.21-2.27)
Singapore	33.83 (31.4-36.19)	79.33 (70.03-86.48)	1.34	9.33 (8.66-9.98)	5.22 (4.61-5.69)	-2.34 (-2.54--2.13)
Slovakia	303.3 (225.1-392.45)	343.31 (247.42-464.65)	0.13	29.24 (21.7-37.83)	20.93 (15.08-28.33)	-1.34 (-1.45--1.24)
Slovenia	94.91 (86.46-104.14)	108.42 (91.92-125.65)	0.14	22.04 (20.07-24.18)	14.81 (12.55-17.16)	-1.5 (-1.65--1.34)
Solomon Islands	0.65 (0.33-0.92)	1.43 (0.92-2.04)	1.2	2.89 (1.46-4.07)	2.63 (1.7-3.77)	-0.29 (-0.38--0.2)
Somalia	12.41 (7.93-19.71)	35.06 (20.22-58.76)	1.83	3.45 (2.2-5.47)	3.72 (2.14-6.23)	0.28 (0.22-0.34)
South Africa	103.78 (69.25-145.36)	303.93 (199.74-358.86)	1.93	3.07 (2.05-4.31)	3.85 (2.53-4.55)	0.72 (0.5-0.94)
South Sudan	15.28 (10.44-21.68)	22.43 (13.92-33.01)	0.47	3.69 (2.52-5.23)	3.6 (2.24-5.3)	-0.12 (-0.21--0.04)
Spain	1459.54 (1325.9-1544.24)	1418.36 (1195.15-1575.62)	-0.03	15.27 (13.87-16.15)	9.17 (7.72-10.18)	-1.8 (-1.95--1.64)
Sri Lanka	211.33 (81.96-281.68)	177.84 (108.98-322.59)	-0.16	11.87 (4.6-15.83)	3.69 (2.26-6.7)	-5.43 (-6.25--4.61)
Sudan	62.73 (35.77-126.44)	130.06 (91.59-190.78)	1.07	4.22 (2.41-8.5)	4.18 (2.94-6.13)	0.16 (0.07-0.24)
Suriname	2.83 (1.98-3.45)	4.96 (3.54-6.77)	0.75	6.5 (4.56-7.94)	4.44 (3.17-6.06)	-1.11 (-1.27--0.95)
Sweden	660.16 (607.18-699.71)	573.12 (492.18-641.68)	-0.13	27.81 (25.58-29.47)	17.02 (14.62-19.06)	-2.07 (-2.55--1.6)
Switzerland	136.2 (122.47-145.83)	200.57 (168.59-228.77)	0.47	8.06 (7.25-8.63)	6.84 (5.75-7.81)	-0.86 (-1.18--0.54)
Syrian Arab Republic	3.04 (2.3-4.32)	8.62 (4.87-11.58)	1.84	0.34 (0.26-0.49)	0.36 (0.21-0.49)	0.51 (0.25-0.78)
Taiwan (Province of China)	319.11 (290.85-341.18)	838.05 (744.25-923.15)	1.63	11.51 (10.49-12.3)	11.13 (9.88-12.26)	-1.34 (-2.1--0.57)
Tajikistan	4.25 (2.59-6.7)	5.2 (3.53-7.16)	0.22	0.91 (0.55-1.43)	0.51 (0.34-0.7)	-2.17 (-2.57--1.77)
Thailand	1783.38 (1105.18-2312.05)	6183.71 (3115.11-8337.85)	2.47	30.05 (18.62-38.96)	31.81 (16.03-42.89)	-0.05 (-0.14-0.05)
Timor-Leste	1.52 (1.01-2.73)	4.71 (3.03-10.2)	2.1	3.51 (2.32-6.27)	3.32 (2.14-7.18)	-0.13 (-0.4-0.14)
Togo	0.33 (0.25-0.46)	1.38 (0.75-2.03)	3.18	0.17 (0.13-0.24)	0.22 (0.12-0.33)	1.75 (1.11-2.4)
Tokelau	0.01 (0.01-0.01)	0.01 (0.01-0.01)	0	3.89 (2.53-5.08)	2.95 (2.07-4.01)	-0.9 (-1.01--0.8)
Tonga	0.24 (0.15-0.33)	0.33 (0.23-0.47)	0.38	2.57 (1.58-3.53)	2.45 (1.7-3.48)	-0.17 (-0.34-0)
Trinidad and Tobago	14.6 (13.67-15.53)	17.19 (13.45-21.75)	0.18	10.63 (9.96-11.31)	4.94 (3.86-6.24)	-3.1 (-3.47--2.73)
Tunisia	94.88 (64.7-120.05)	243.42 (161.65-332.92)	1.57	10.9 (7.43-13.79)	10.42 (6.92-14.24)	-0.3 (-0.46--0.14)
Turkey	574.93 (404.43-725.49)	1092.81 (823.53-1476.84)	0.9	9.62 (6.77-12.14)	6.61 (4.98-8.94)	-1.3 (-1.45--1.15)
Turkmenistan	43.78 (38.04-49.89)	25.4 (19.57-33.1)	-0.42	13.48 (11.71-15.36)	3.59 (2.77-4.68)	-5.44 (-6.55--4.31)
Tuvalu	0.04 (0.02-0.06)	0.05 (0.04-0.07)	0.25	3.56 (2.12-4.9)	2.83 (1.98-3.66)	-0.99 (-1.1--0.87)
Uganda	38.54 (27.29-50.45)	88.83 (60.81-124.15)	1.3	3.69 (2.61-4.82)	3.75 (2.56-5.24)	-0.27 (-0.47--0.07)
Ukraine	711.4 (550.26-947.26)	716.93 (537.5-927.43)	0.01	5.71 (4.41-7.6)	5.28 (3.96-6.83)	-0.15 (-0.44-0.13)
United Arab Emirates	13.35 (8.16-19.34)	58.43 (42.64-83.06)	3.38	23.79 (14.53-34.46)	8.14 (5.94-11.57)	-2.29 (-2.77--1.81)
United Kingdom	1053.42 (991.22-1085.48)	1376.24 (1214.88-1455.93)	0.31	7.09 (6.67-7.31)	6.54 (5.78-6.92)	0.21 (-0.22-0.63)
United Republic of Tanzania	72.2 (51.44-93)	164.37 (108.12-226.11)	1.28	4 (2.85-5.15)	3.99 (2.62-5.49)	0.07 (0.03-0.12)
United States of America	4095.46 (3746.47-4282.33)	4901.87 (4397.06-5193.58)	0.2	7.81 (7.14-8.16)	4.89 (4.39-5.18)	-1.76 (-1.91--1.61)
United States Virgin Islands	1.4 (0.81-1.75)	1.53 (1.08-2.14)	0.09	10.02 (5.83-12.5)	4.74 (3.34-6.64)	-2.88 (-3.26--2.5)
Uruguay	209.1 (192.31-224.84)	214.74 (193.87-236.02)	0.03	30.99 (28.5-33.32)	23.75 (21.44-26.1)	-1.11 (-1.23--1)
Uzbekistan	24.57 (15.9-37.43)	81.07 (63.14-104.33)	2.3	1.26 (0.81-1.91)	1.74 (1.36-2.24)	1.05 (0.59-1.52)
Vanuatu	0.27 (0.16-0.37)	0.68 (0.47-0.92)	1.52	2.75 (1.59-3.71)	2.37 (1.63-3.22)	-0.73 (-0.83--0.63)
Venezuela (Bolivarian Republic of)	305.92 (288.8-320.29)	415.73 (313.24-529.24)	0.36	19.54 (18.44-20.45)	7.95 (5.99-10.12)	-3.3 (-3.67--2.93)
Viet Nam	373.48 (282.12-494.2)	1000.8 (682.71-1470.14)	1.68	5.36 (4.05-7.09)	5.73 (3.91-8.42)	0.17 (0-0.34)
Yemen	34.14 (20.49-63.23)	108.21 (70.2-158.89)	2.17	4.26 (2.55-7.88)	4.81 (3.12-7.06)	0.6 (0.48-0.71)
Zambia	18.56 (12.62-24.1)	47.07 (29.06-63.48)	1.54	4.03 (2.74-5.24)	4.36 (2.69-5.88)	0.2 (0.1-0.29)
Zimbabwe	33.5 (23.71-42.46)	61.15 (42.85-84.9)	0.83	5.05 (3.58-6.41)	5.52 (3.87-7.67)	0.65 (0.29-1)

## Sheet: Table S6
The incidence of GBTC cases and rates aged 55 years and above in 1990 and 2021 across 204 countries, and the trends from 1990 to 2021.
location		Incident cases			Incident rates
	1990_number(95%UI)	2021_number(95%UI)	percentage change(100%)	1990_per 100000(95%UI)	2021_per 100000(95%UI)	EAPC(95% CI)
Afghanistan	75.8 (31.15-149.84)	103.46 (51.57-161.15)	0.36	6.24 (2.56-12.33)	8.42 (4.2-13.11)	1.48 (1.33-1.63)
Albania	24.42 (17.32-33.67)	52.99 (35.76-77.86)	1.17	7.04 (4.99-9.7)	6.74 (4.55-9.9)	0.34 (0.15-0.53)
Algeria	324.07 (220.91-430.21)	853.53 (611.06-1123.76)	1.63	15.47 (10.54-20.53)	14.05 (10.06-18.5)	-0.22 (-0.29--0.14)
American Samoa	0.1 (0.08-0.13)	0.18 (0.14-0.28)	0.8	2.78 (2.08-3.67)	2.14 (1.63-3.32)	-0.83 (-1.26--0.4)
Andorra	1.87 (1.28-2.68)	4.08 (2.74-5.54)	1.18	18.9 (12.98-27.14)	15.4 (10.35-20.94)	-0.4 (-0.68--0.12)
Angola	8.6 (5.58-12.71)	30.65 (20.37-41.59)	2.56	1.38 (0.9-2.04)	1.59 (1.05-2.15)	0.67 (0.55-0.79)
Antigua and Barbuda	1.1 (1.01-1.21)	1.03 (0.97-1.1)	-0.06	12.75 (11.65-14.01)	5.48 (5.14-5.82)	-3.26 (-3.59--2.93)
Argentina	1745.57 (1621.64-1841.3)	1613.17 (1475.2-1723.46)	-0.08	31.37 (29.14-33.09)	17.28 (15.81-18.47)	-1.89 (-2.01--1.77)
Armenia	16.91 (14.24-20.43)	63.9 (53.79-75.44)	2.78	3.47 (2.92-4.2)	8.12 (6.84-9.59)	3.37 (2.68-4.07)
Australia	632.95 (593.16-670.86)	1392.57 (1195.19-1518.51)	1.2	19.29 (18.08-20.44)	18.8 (16.13-20.5)	-0.19 (-0.44-0.07)
Austria	533.82 (488-567.56)	415.29 (361.51-455.76)	-0.22	27.43 (25.08-29.17)	14.05 (12.23-15.42)	-2.08 (-2.28--1.87)
Azerbaijan	33.81 (21.28-49.63)	55.88 (32.86-83.81)	0.65	3.88 (2.44-5.69)	2.92 (1.72-4.37)	-0.96 (-1.23--0.7)
Bahamas	2.79 (2.49-3.05)	4.69 (3.86-5.71)	0.68	11.34 (10.14-12.42)	6.52 (5.37-7.93)	-1.98 (-2.14--1.83)
Bahrain	1.29 (0.98-1.7)	5.41 (3.51-7.51)	3.19	4.6 (3.49-6.08)	3.33 (2.16-4.62)	-1.41 (-1.69--1.13)
Bangladesh	603.56 (450.19-903.28)	2043.24 (1371.91-3126.71)	2.39	7.97 (5.94-11.92)	8.74 (5.87-13.38)	0.32 (0.21-0.43)
Barbados	4.9 (4.44-5.36)	6.25 (4.86-7.77)	0.28	10.46 (9.48-11.43)	6.86 (5.33-8.52)	-1.55 (-1.74--1.37)
Belarus	140.56 (126.27-156.01)	220.49 (179.44-269.47)	0.57	6.07 (5.45-6.74)	7.66 (6.24-9.37)	0.66 (0.44-0.89)
Belgium	338.81 (303.13-367.33)	294.93 (252.75-326.73)	-0.13	12.92 (11.56-14.01)	7.8 (6.69-8.64)	-1.75 (-1.97--1.53)
Belize	1.29 (1.11-1.49)	2.31 (2.03-2.62)	0.79	8.41 (7.23-9.65)	4.61 (4.04-5.23)	-2.43 (-2.82--2.03)
Benin	0.53 (0.42-0.77)	1.52 (0.84-2.05)	1.87	0.17 (0.13-0.24)	0.18 (0.1-0.25)	1.19 (0.61-1.77)
Bermuda	0.92 (0.72-1.05)	0.97 (0.82-1.19)	0.05	8.71 (6.85-9.95)	4.15 (3.52-5.12)	-2.87 (-3.1--2.64)
Bhutan	3.23 (2.1-5.23)	10.54 (7.23-15.03)	2.26	8.15 (5.3-13.17)	10.58 (7.26-15.09)	0.8 (0.75-0.85)
Bolivia (Plurinational State of)	184.29 (107.61-251.42)	415.11 (266.39-603.36)	1.25	35.15 (20.52-47.95)	26.86 (17.24-39.04)	-0.94 (-1.02--0.86)
Bosnia and Herzegovina	173.84 (111.02-205.99)	186.15 (135.82-317.71)	0.07	23.7 (15.13-28.08)	17 (12.4-29.01)	-1.4 (-1.55--1.24)
Botswana	2.64 (1.81-3.87)	6.77 (4.83-10.1)	1.56	2.84 (1.94-4.16)	2.79 (1.99-4.17)	0.3 (0.02-0.58)
Brazil	2171.67 (2035.58-2258.7)	4803.76 (4368.27-5057.72)	1.21	14.69 (13.77-15.28)	11.09 (10.09-11.68)	-1.1 (-1.23--0.96)
Brunei Darussalam	2.82 (2.06-3.56)	6.12 (4.8-7.98)	1.17	17.99 (13.15-22.76)	10.22 (8.01-13.34)	-1.63 (-1.73--1.52)
Bulgaria	190.78 (173.2-207.68)	225.14 (188.51-265.85)	0.18	8.43 (7.65-9.18)	9.47 (7.93-11.18)	0.26 (0.02-0.51)
Burkina Faso	1.29 (0.96-1.75)	3.35 (1.78-4.49)	1.6	0.18 (0.13-0.24)	0.22 (0.12-0.3)	1.54 (0.95-2.14)
Burundi	18.03 (10.76-25.8)	25.63 (14.57-37.7)	0.42	4.79 (2.86-6.86)	3.2 (1.82-4.71)	-1.76 (-1.92--1.6)
Cabo Verde	0.24 (0.17-0.45)	1.33 (0.49-1.78)	4.54	0.6 (0.44-1.14)	1.73 (0.64-2.32)	3.53 (2.6-4.47)
Cambodia	35.9 (22.67-62.46)	100.19 (63.01-216.68)	1.79	4.85 (3.06-8.43)	4.61 (2.9-9.97)	-0.28 (-0.49--0.07)
Cameroon	1.37 (1.09-1.86)	4.36 (2.42-6.19)	2.18	0.18 (0.15-0.25)	0.21 (0.12-0.3)	1.36 (0.78-1.94)
Canada	838.82 (766.12-893.93)	1209.2 (1044.64-1326.3)	0.44	15.37 (14.03-16.38)	9.85 (8.51-10.81)	-1.42 (-1.55--1.29)
Central African Republic	3 (1.96-4.69)	5.03 (3.14-8.29)	0.68	1.59 (1.04-2.48)	1.41 (0.88-2.32)	-0.35 (-0.42--0.29)
Chad	0.67 (0.5-0.99)	1.76 (1.11-2.31)	1.63	0.14 (0.11-0.21)	0.19 (0.12-0.25)	1.74 (1.23-2.26)
Chile	1404.98 (1322.01-1498.87)	2083.16 (1879.43-2278.93)	0.48	83.54 (78.61-89.13)	46.52 (41.97-50.9)	-2.14 (-2.34--1.94)
China	13666.13 (10632.84-17817.71)	44512.86 (30654.72-57372.56)	2.26	9.52 (7.41-12.41)	11.75 (8.09-15.14)	0.73 (0.66-0.8)
Colombia	591.14 (552.33-632.82)	1192.65 (997.11-1397.61)	1.02	20.53 (19.18-21.98)	12.47 (10.43-14.61)	-1.83 (-2.04--1.62)
Comoros	1.14 (0.75-1.55)	2.99 (1.87-4.56)	1.62	3.51 (2.32-4.77)	3.69 (2.31-5.64)	0.17 (0.13-0.22)
Congo	3.29 (2.2-4.74)	7.61 (5.02-10.12)	1.31	1.85 (1.24-2.66)	1.75 (1.16-2.33)	-0.16 (-0.22--0.1)
Cook Islands	0.07 (0.04-0.09)	0.12 (0.08-0.18)	0.71	3.35 (1.8-4.36)	2.56 (1.72-3.88)	-1.07 (-1.25--0.9)
Costa Rica	55.33 (50.48-59.25)	95.87 (83.62-108.14)	0.73	19.46 (17.75-20.83)	10.01 (8.73-11.29)	-2.91 (-3.23--2.59)
Cote d'Ivoire	0.96 (0.73-1.26)	3.46 (1.89-4.65)	2.6	0.15 (0.11-0.2)	0.19 (0.11-0.26)	1.63 (1.11-2.16)
Croatia	223.53 (202.58-243.86)	352.52 (297.41-405.35)	0.58	20.08 (18.2-21.91)	23.64 (19.94-27.18)	0.58 (0.41-0.75)
Cuba	150.76 (138.34-162.71)	175.76 (151.6-197.13)	0.17	8.9 (8.16-9.6)	5.14 (4.44-5.77)	-2 (-2.15--1.85)
Cyprus	20.81 (14.86-26.37)	38.86 (28.41-51.74)	0.87	14.89 (10.64-18.88)	11.12 (8.13-14.8)	-0.9 (-0.99--0.81)
Czechia	990.21 (891.37-1091.96)	945.73 (794.76-1113.37)	-0.04	41.82 (37.65-46.12)	27.07 (22.75-31.87)	-1.8 (-1.92--1.68)
Democratic People's Republic of Korea	200.21 (137.19-342.77)	377.07 (251.98-682.14)	0.88	7.52 (5.15-12.88)	6.69 (4.47-12.1)	-0.02 (-0.17-0.14)
Democratic Republic of the Congo	33.28 (22.62-48.82)	79.81 (50.52-122.05)	1.4	1.26 (0.86-1.85)	1.32 (0.84-2.02)	0.2 (0.13-0.28)
Denmark	142 (127.95-154.74)	233.27 (207.45-255.79)	0.64	10.88 (9.81-11.86)	12.12 (10.78-13.29)	0.01 (-0.21-0.24)
Djibouti	0.67 (0.45-0.98)	3.39 (2.02-5.53)	4.06	3.1 (2.09-4.57)	3.27 (1.95-5.33)	0.17 (0.13-0.2)
Dominica	1.12 (0.75-1.55)	1.17 (0.86-1.48)	0.04	11.42 (7.61-15.77)	7.77 (5.73-9.82)	-1.5 (-1.62--1.38)
Dominican Republic	29.28 (16.84-36.51)	65.25 (48.91-93.98)	1.23	4.79 (2.75-5.97)	3.9 (2.93-5.62)	-0.37 (-0.52--0.22)
Ecuador	197.72 (185.56-209.04)	412.35 (327.75-507.54)	1.09	22.99 (21.58-24.31)	14.9 (11.84-18.34)	-1.29 (-1.43--1.15)
Egypt	188.76 (156.52-313.92)	637.02 (447.14-795.48)	2.37	4.22 (3.5-7.02)	5.76 (4.04-7.19)	1.62 (1.33-1.92)
El Salvador	66.65 (48.86-79.88)	131.34 (101.62-183.13)	0.97	13.63 (9.99-16.34)	12.84 (9.94-17.91)	-0.53 (-0.71--0.36)
Equatorial Guinea	0.48 (0.32-0.75)	1.33 (0.83-1.97)	1.77	1.51 (0.99-2.34)	1.68 (1.04-2.49)	0.61 (0.5-0.72)
Eritrea	6.5 (4.23-10)	18.33 (10.82-27)	1.82	3.68 (2.4-5.66)	4.16 (2.46-6.13)	0.48 (0.41-0.55)
Estonia	38.58 (35.43-42.15)	52.88 (44.92-60.01)	0.37	10.76 (9.88-11.76)	12.09 (10.27-13.72)	0.15 (-0.06-0.36)
Eswatini	1.38 (0.98-2.01)	3.64 (2.34-5.46)	1.64	3.06 (2.18-4.46)	4.02 (2.58-6.03)	1.24 (0.91-1.58)
Ethiopia	267.75 (163.1-425.3)	425.81 (294.23-601.38)	0.59	8.33 (5.08-13.24)	6.22 (4.3-8.78)	-1.26 (-1.46--1.06)
Fiji	2.37 (1.72-3.12)	6.3 (3.7-8.64)	1.66	4.2 (3.05-5.54)	4.61 (2.71-6.32)	0.51 (0.32-0.69)
Finland	242.06 (218.18-259.04)	332.92 (285.05-370.01)	0.38	20.39 (18.38-21.82)	16.54 (14.16-18.38)	-0.97 (-1.29--0.65)
France	2321.74 (2118.67-2477.66)	2158.26 (1818.24-2441.71)	-0.07	16.68 (15.22-17.8)	9.76 (8.22-11.04)	-1.88 (-1.98--1.77)
Gabon	1.99 (1.36-2.71)	3.22 (2.08-4.34)	0.62	2.03 (1.39-2.77)	1.8 (1.17-2.43)	-0.48 (-0.65--0.31)
Gambia	0 (0-0)	0 (0-0)	NA	0 (0-0)	0 (0-0)	0.28 (0.17-0.39)
Georgia	100.97 (82.5-122.13)	84.37 (69.66-102.13)	-0.16	9.09 (7.43-11)	8.04 (6.64-9.73)	-1.2 (-2.28--0.11)
Germany	7074.88 (6508.86-7530)	6323.06 (5461.23-6907.31)	-0.11	33.72 (31.02-35.89)	20.06 (17.33-21.92)	-1.74 (-2.04--1.45)
Ghana	1.45 (1.08-1.99)	5.96 (3.43-7.8)	3.11	0.14 (0.11-0.19)	0.22 (0.13-0.29)	2.36 (1.73-3)
Greece	341.79 (317.77-361.98)	455.1 (405.03-493.01)	0.33	12.78 (11.89-13.54)	12.38 (11.02-13.41)	0.15 (-0.58-0.89)
Greenland	0.9 (0.55-1.1)	1 (0.73-1.39)	0.11	16.38 (10.03-19.98)	7.37 (5.38-10.25)	-2.41 (-2.64--2.19)
Grenada	1.25 (1.08-1.44)	1.31 (1.13-1.49)	0.05	10.38 (8.98-11.93)	6.5 (5.62-7.4)	-1.74 (-1.87--1.61)
Guam	0.27 (0.19-0.33)	0.48 (0.36-0.67)	0.78	2.11 (1.51-2.55)	1.28 (0.96-1.77)	-1.11 (-1.31--0.91)
Guatemala	116.28 (110.48-121.63)	137.26 (118.73-158.72)	0.18	20.22 (19.21-21.15)	7.5 (6.49-8.67)	-4.06 (-4.38--3.75)
Guinea	0.86 (0.63-1.27)	1.8 (1.03-2.51)	1.09	0.16 (0.11-0.23)	0.2 (0.11-0.27)	1.59 (1.13-2.05)
Guinea-Bissau	0.13 (0.09-0.18)	0.27 (0.17-0.38)	1.08	0.2 (0.14-0.29)	0.24 (0.15-0.33)	1.35 (0.78-1.93)
Guyana	4.77 (4.18-5.33)	5.3 (4.21-6.7)	0.11	7.78 (6.82-8.69)	4.71 (3.74-5.95)	-1.83 (-2.06--1.59)
Haiti	48.94 (27.14-73.5)	77.27 (48.39-116.47)	0.58	9.07 (5.03-13.63)	6.52 (4.08-9.83)	-1.03 (-1.07--0.99)
Honduras	35.01 (26.48-43.9)	162.08 (110.49-215.93)	3.63	10.5 (7.94-13.17)	15.41 (10.51-20.53)	1.31 (1.12-1.49)
Hungary	980.83 (898.28-1046.94)	578.71 (503.76-650.73)	-0.41	38.08 (34.88-40.65)	18.2 (15.84-20.46)	-2.75 (-2.92--2.57)
Iceland	6.17 (5.57-6.73)	9.39 (8.04-10.66)	0.52	12.94 (11.67-14.1)	9.64 (8.25-10.95)	-1.03 (-1.16--0.91)
India	5175.83 (4238.07-7572.25)	21569.44 (14886.18-25381.29)	3.17	6.75 (5.53-9.88)	10.73 (7.4-12.62)	1.6 (1.55-1.66)
Indonesia	537.8 (362.8-947.11)	1243.9 (816.19-2691.13)	1.31	3.33 (2.25-5.86)	2.97 (1.95-6.43)	-0.49 (-0.55--0.43)
Iran (Islamic Republic of)	94.41 (73.71-131.75)	524.43 (290.32-609.67)	4.55	2.05 (1.6-2.86)	4.04 (2.23-4.69)	3.35 (2.86-3.84)
Iraq	61.07 (44.57-84.25)	184.5 (126.73-239.15)	2.02	4.84 (3.53-6.67)	4.75 (3.26-6.16)	-0.1 (-0.3-0.1)
Ireland	81.73 (75.16-87.48)	93.34 (80.1-104.21)	0.14	12.01 (11.04-12.85)	7.11 (6.1-7.94)	-1.92 (-2.2--1.64)
Israel	93.02 (84.39-100.43)	132.65 (114.9-147.82)	0.43	11.48 (10.41-12.39)	6.64 (5.75-7.4)	-2.14 (-2.34--1.93)
Italy	3304.57 (3043.88-3463.89)	4820.1 (4150.42-5291.83)	0.46	21.71 (20-22.76)	21.22 (18.27-23.29)	-0.16 (-0.33-0.01)
Jamaica	22.2 (19.98-24.68)	28.28 (22.24-36.32)	0.27	7.54 (6.78-8.38)	5.35 (4.2-6.87)	-1.38 (-1.64--1.13)
Japan	14416.29 (13232.56-15118.64)	28358.25 (22976.57-31518.34)	0.97	48.68 (44.68-51.05)	54.33 (44.02-60.38)	0.32 (0.2-0.44)
Jordan	16.38 (12.14-21.01)	68.71 (47.09-95.97)	3.19	7.62 (5.65-9.77)	5.47 (3.75-7.63)	-0.97 (-1.29--0.65)
Kazakhstan	128.41 (101.49-173.82)	155.27 (127.93-184.27)	0.21	6.14 (4.85-8.31)	4.89 (4.03-5.81)	-0.99 (-1.24--0.74)
Kenya	60.29 (44.98-93.05)	188.6 (135.74-270)	2.13	4.52 (3.37-6.98)	5.04 (3.63-7.22)	0.67 (0.53-0.8)
Kiribati	0.15 (0.08-0.19)	0.3 (0.15-0.4)	1	2.49 (1.33-3.15)	2.37 (1.22-3.18)	-0.15 (-0.28--0.03)
Kuwait	7.39 (6.66-8.07)	25.08 (20.48-29.73)	2.39	8.08 (7.28-8.82)	5.38 (4.39-6.38)	-0.83 (-1.84-0.18)
Kyrgyzstan	27.12 (23.06-31.95)	39.23 (31.96-47.53)	0.45	5.27 (4.48-6.21)	4.64 (3.78-5.62)	-2.57 (-3.7--1.41)
Lao People's Democratic Republic	17.31 (9.53-28.83)	28.13 (18.02-62.54)	0.63	5.05 (2.78-8.41)	3.64 (2.33-8.09)	-1.18 (-1.3--1.06)
Latvia	38.26 (35.05-41.32)	50.79 (43.76-57.73)	0.33	6.12 (5.61-6.61)	7.72 (6.65-8.77)	0.5 (0.34-0.66)
Lebanon	31.83 (19.03-41.98)	87.55 (53.63-115.39)	1.75	8.4 (5.02-11.07)	8.93 (5.47-11.77)	0.68 (0.45-0.91)
Lesotho	3.35 (2.28-5.22)	7.6 (5.06-11.37)	1.27	2.4 (1.63-3.73)	4.21 (2.8-6.3)	2.54 (2.18-2.91)
Liberia	0.32 (0.25-0.43)	0.58 (0.32-0.84)	0.81	0.17 (0.13-0.23)	0.18 (0.1-0.25)	1.05 (0.45-1.65)
Libya	50.39 (37.37-69.77)	135.85 (91.4-183.55)	1.7	16.2 (12.02-22.43)	16.24 (10.93-21.95)	0.54 (0.29-0.79)
Lithuania	80.52 (73.17-86.82)	121.78 (106.04-138.17)	0.51	10.16 (9.23-10.96)	12.58 (10.96-14.28)	0.05 (-0.43-0.52)
Luxembourg	13.14 (12.17-13.94)	15.43 (13.44-17.34)	0.17	14.07 (13.03-14.92)	8.68 (7.56-9.76)	-1.31 (-1.44--1.18)
Madagascar	26.11 (18.53-33.49)	49.01 (30.22-67.72)	0.88	3.09 (2.19-3.96)	2.65 (1.64-3.67)	-0.56 (-0.62--0.49)
Malawi	7.34 (4.93-9.48)	13.9 (8.51-20.22)	0.89	1.17 (0.78-1.51)	1.19 (0.73-1.73)	-0.14 (-0.29-0)
Malaysia	89.41 (50.76-109.01)	261.86 (168.41-319.61)	1.93	6.06 (3.44-7.39)	5.34 (3.44-6.52)	-0.84 (-1.05--0.62)
Maldives	0.68 (0.36-0.94)	1.45 (0.98-1.86)	1.13	4.46 (2.33-6.16)	2.66 (1.81-3.42)	-1.87 (-2.03--1.71)
Mali	6.91 (5.34-10.18)	15.39 (11.06-23.51)	1.23	1.03 (0.8-1.52)	1.06 (0.76-1.62)	0.74 (0.47-1.02)
Malta	6.52 (5.94-7.09)	10.4 (8.96-11.67)	0.6	9 (8.2-9.79)	6.59 (5.68-7.4)	-1.45 (-1.62--1.29)
Marshall Islands	0.08 (0.05-0.11)	0.15 (0.1-0.21)	0.87	3.33 (1.97-4.43)	2.55 (1.64-3.57)	-1.16 (-1.25--1.07)
Mauritania	0.31 (0.23-0.43)	0.7 (0.4-1.02)	1.26	0.18 (0.14-0.26)	0.2 (0.11-0.28)	0.85 (0.23-1.47)
Mauritius	10.14 (9.6-10.71)	12.97 (11.98-13.83)	0.28	8.33 (7.89-8.8)	3.83 (3.54-4.09)	-4.14 (-5.71--2.55)
Mexico	1534.58 (1485.32-1570.8)	2253.56 (1991.85-2526.82)	0.47	22.07 (21.36-22.59)	10.46 (9.24-11.73)	-2.8 (-2.98--2.62)
Micronesia (Federated States of)	0.3 (0.19-0.4)	0.35 (0.23-0.48)	0.17	3.82 (2.34-5.09)	2.66 (1.78-3.67)	-1.43 (-1.51--1.35)
Monaco	0.67 (0.42-0.86)	0.9 (0.66-1.23)	0.34	6.07 (3.83-7.8)	5.78 (4.2-7.86)	-0.14 (-0.22--0.06)
Mongolia	26.61 (17.49-40.19)	46.02 (32.91-69.49)	0.73	15.36 (10.1-23.2)	11.66 (8.34-17.6)	-1.02 (-1.15--0.9)
Montenegro	8.3 (5.91-10.94)	14.91 (10.85-20.16)	0.8	7.62 (5.43-10.04)	8.55 (6.22-11.56)	0.47 (0.3-0.63)
Morocco	71.97 (42.53-89.68)	189.61 (109.95-241.95)	1.63	3.07 (1.81-3.82)	3.16 (1.83-4.03)	0.19 (0.14-0.25)
Mozambique	31.62 (19.98-44.16)	70.31 (38.99-102.92)	1.22	3.24 (2.04-4.52)	3.93 (2.18-5.75)	0.99 (0.86-1.12)
Myanmar	167.38 (104.39-298.49)	265.26 (172.72-567.85)	0.58	4.28 (2.67-7.63)	3.14 (2.05-6.73)	-1.21 (-1.31--1.11)
Namibia	2.48 (1.78-3.23)	5.49 (3.66-7.65)	1.21	2.28 (1.64-2.98)	2.43 (1.62-3.39)	-0.03 (-0.27-0.22)
Nauru	0.03 (0.02-0.04)	0.03 (0.02-0.05)	0	4.24 (2.58-5.9)	3.68 (2.18-5.14)	-0.7 (-0.82--0.57)
Nepal	114.69 (81.79-184.19)	398.03 (291.49-549.24)	2.47	7.45 (5.31-11.97)	10.06 (7.36-13.88)	1.09 (0.94-1.25)
Netherlands	613.36 (560.71-651.84)	841.36 (745.1-930.51)	0.37	18.53 (16.93-19.69)	14.38 (12.73-15.9)	-0.58 (-0.81--0.35)
New Zealand	81.59 (74.21-87.51)	282.19 (247.19-312.64)	2.46	12.4 (11.28-13.3)	19.78 (17.33-21.92)	1.25 (0.76-1.74)
Nicaragua	35.39 (23.05-42.2)	82.87 (63.78-128.53)	1.34	14.24 (9.28-16.98)	10.18 (7.84-15.79)	-1.16 (-1.31--1.02)
Niger	0.59 (0.44-0.86)	2.23 (1.32-3.17)	2.78	0.13 (0.1-0.2)	0.16 (0.1-0.23)	1.25 (0.6-1.9)
Nigeria	12.39 (9.24-17.69)	28.11 (19.46-39.4)	1.27	0.17 (0.13-0.24)	0.19 (0.13-0.26)	0.72 (0.47-0.97)
Niue	0.01 (0.01-0.02)	0.01 (0.01-0.01)	0	3.9 (2.48-4.88)	2.98 (2.05-3.78)	-0.86 (-0.9--0.83)
North Macedonia	44.14 (33.19-57.23)	71.44 (52.38-92.31)	0.62	13.42 (10.09-17.4)	12.05 (8.84-15.57)	-0.55 (-0.77--0.33)
Northern Mariana Islands	0.04 (0.03-0.08)	0.17 (0.13-0.3)	3.25	1.77 (1.31-3.36)	1.71 (1.35-3.08)	-0.07 (-0.67-0.53)
Norway	121.69 (111.8-128.59)	189.28 (165.2-205.8)	0.56	11.24 (10.32-11.87)	11.67 (10.19-12.69)	-0.27 (-0.56-0.01)
Oman	4.6 (3.05-6.24)	10.01 (7.04-13.35)	1.18	4.57 (3.04-6.21)	3.2 (2.25-4.27)	-0.75 (-0.93--0.56)
Pakistan	1217.54 (935.53-1652.46)	2870.65 (2070.35-3816.56)	1.36	13.35 (10.26-18.12)	14.48 (10.44-19.25)	-0.07 (-0.28-0.13)
Palau	0.04 (0.02-0.05)	0.08 (0.05-0.11)	1	2.25 (1.48-3.17)	1.88 (1.24-2.7)	-0.68 (-0.76--0.59)
Palestine	11.13 (7.32-14.43)	24.78 (15.78-30.77)	1.23	7.67 (5.04-9.94)	5.76 (3.67-7.15)	-0.79 (-1--0.58)
Panama	31.2 (28.84-33.62)	46.6 (36.91-55.27)	0.49	12.88 (11.9-13.87)	6.27 (4.96-7.43)	-2.37 (-2.56--2.19)
Papua New Guinea	7.11 (4-9.95)	15.42 (10.25-21.58)	1.17	2.4 (1.35-3.36)	1.88 (1.25-2.63)	-1.01 (-1.09--0.93)
Paraguay	33.61 (24.42-42.78)	90.26 (62.45-126.97)	1.69	9.27 (6.73-11.79)	9.12 (6.31-12.82)	-0.12 (-0.22--0.02)
Peru	420.04 (297.41-510.47)	1174.51 (820.47-1643.23)	1.8	21.3 (15.08-25.89)	21 (14.67-29.38)	-0.38 (-0.65--0.11)
Philippines	94.16 (74.07-159.2)	309.64 (244.15-554.76)	2.29	1.97 (1.55-3.33)	2.22 (1.75-3.98)	0.41 (0.38-0.44)
Poland	1890.44 (1803.03-1960.83)	1922.23 (1737.52-2084.95)	0.02	24.53 (23.4-25.45)	15.87 (14.34-17.21)	-1.86 (-2.05--1.67)
Portugal	348.45 (320.94-369.7)	545.78 (480.68-602.28)	0.57	14.29 (13.16-15.16)	14.03 (12.35-15.48)	-0.1 (-0.21-0.01)
Puerto Rico	44.92 (41.21-48.6)	48.63 (39.86-56.92)	0.08	7.4 (6.79-8.01)	4.17 (3.41-4.88)	-2.41 (-2.62--2.19)
Qatar	1.21 (0.9-1.61)	7.65 (5.11-11.84)	5.32	7.39 (5.52-9.87)	4.99 (3.34-7.73)	-1.2 (-1.57--0.83)
Republic of Korea	2286.42 (1564.52-2854.29)	7248.34 (4442.44-9240.35)	2.17	45.94 (31.44-57.35)	43.34 (26.56-55.25)	-0.09 (-0.18-0)
Republic of Moldova	54.55 (49.39-59.48)	48.24 (43.62-53.88)	-0.12	7.07 (6.4-7.7)	4.57 (4.13-5.1)	-1.39 (-1.7--1.08)
Romania	576.73 (528.58-619.63)	540.26 (469.8-612.2)	-0.06	11.53 (10.56-12.38)	9 (7.82-10.19)	-0.6 (-0.89--0.31)
Russian Federation	2925.65 (2806.93-3011.61)	4626.05 (4247.29-4993.92)	0.58	9.27 (8.89-9.54)	10.88 (9.99-11.75)	-0.08 (-0.43-0.27)
Rwanda	24.39 (15.23-32.44)	42.83 (27.63-60.25)	0.76	5.21 (3.25-6.93)	4.05 (2.61-5.7)	-1.55 (-1.81--1.29)
Saint Kitts and Nevis	0.74 (0.6-0.82)	0.55 (0.46-0.65)	-0.26	11.5 (9.46-12.75)	4.29 (3.54-5.06)	-3.44 (-3.7--3.19)
Saint Lucia	1.18 (0.99-1.31)	1.63 (1.33-1.96)	0.38	8.04 (6.77-8.92)	3.87 (3.15-4.67)	-3.03 (-3.33--2.72)
Saint Vincent and the Grenadines	1.01 (0.93-1.1)	1.01 (0.9-1.15)	0	8.45 (7.74-9.19)	3.99 (3.54-4.54)	-2.78 (-3--2.55)
Samoa	0.46 (0.29-0.6)	0.69 (0.47-0.9)	0.5	3.22 (2.01-4.14)	2.79 (1.91-3.66)	-0.57 (-0.67--0.47)
San Marino	1.37 (1.02-1.77)	1.53 (0.99-2.23)	0.12	23.3 (17.37-30.08)	12.89 (8.33-18.83)	-1.06 (-1.45--0.67)
Sao Tome and Principe	0.67 (0.46-0.84)	1.23 (0.79-1.59)	0.84	5.98 (4.13-7.48)	6.73 (4.31-8.72)	0.52 (0.32-0.72)
Saudi Arabia	66.08 (47.87-107.58)	197.45 (147.9-293.12)	1.99	7.42 (5.37-12.07)	6.56 (4.91-9.74)	-0.29 (-0.48--0.11)
Senegal	0.82 (0.62-1.13)	2.59 (1.52-3.73)	2.16	0.16 (0.12-0.21)	0.2 (0.12-0.29)	1.68 (1.05-2.31)
Serbia	257.25 (175.31-339.52)	349.35 (243.16-465.3)	0.36	12.37 (8.43-16.32)	12.45 (8.67-16.59)	-0.29 (-0.48--0.1)
Seychelles	0.75 (0.43-0.9)	0.84 (0.68-1.22)	0.12	7.8 (4.51-9.34)	4.04 (3.26-5.9)	-2.64 (-3.05--2.23)
Sierra Leone	0.51 (0.37-0.68)	1.17 (0.64-1.61)	1.29	0.15 (0.11-0.21)	0.19 (0.11-0.27)	1.69 (1.14-2.23)
Singapore	33.81 (31.23-36.22)	104.96 (92.62-115.18)	2.1	9.32 (8.61-9.99)	6.91 (6.1-7.58)	-1.31 (-1.48--1.14)
Slovakia	358.5 (263.81-463.9)	514.23 (364.74-699.08)	0.43	34.56 (25.43-44.71)	31.35 (22.24-42.62)	-0.55 (-0.67--0.42)
Slovenia	100.72 (91.37-110.61)	161.61 (135.54-189.03)	0.6	23.38 (21.21-25.68)	22.07 (18.51-25.82)	-0.2 (-0.37--0.02)
Solomon Islands	0.61 (0.31-0.87)	1.34 (0.87-1.92)	1.2	2.72 (1.39-3.85)	2.47 (1.61-3.54)	-0.32 (-0.42--0.21)
Somalia	11.62 (7.47-18.62)	32.86 (18.89-55.08)	1.83	3.23 (2.08-5.17)	3.48 (2-5.84)	0.28 (0.22-0.33)
South Africa	94.77 (64.01-134.58)	286.8 (187.31-339.37)	2.03	2.81 (1.9-3.99)	3.64 (2.37-4.3)	0.83 (0.62-1.04)
South Sudan	14.03 (9.59-19.65)	20.91 (13-30.79)	0.49	3.38 (2.31-4.74)	3.36 (2.09-4.95)	-0.07 (-0.17-0.03)
Spain	1974.53 (1797.11-2103.26)	2877.45 (2471.39-3213.99)	0.46	20.65 (18.8-22)	18.59 (15.97-20.77)	-0.43 (-0.6--0.27)
Sri Lanka	197.44 (76.83-262.8)	187.93 (113.59-354.3)	-0.05	11.09 (4.32-14.77)	3.9 (2.36-7.36)	-5.03 (-5.85--4.21)
Sudan	58.28 (33.14-119.16)	123.33 (85.66-180.05)	1.12	3.92 (2.23-8.01)	3.96 (2.75-5.78)	0.21 (0.13-0.3)
Suriname	2.61 (1.83-3.18)	4.64 (3.32-6.33)	0.78	6 (4.19-7.3)	4.16 (2.97-5.67)	-1.08 (-1.24--0.92)
Sweden	781.43 (712.32-833.06)	576.14 (494.23-648.59)	-0.26	32.92 (30-35.09)	17.11 (14.68-19.27)	-2.52 (-3.07--1.97)
Switzerland	228.42 (203.09-248.3)	488.83 (404.69-563.87)	1.14	13.52 (12.02-14.7)	16.68 (13.81-19.24)	0.27 (-0.13-0.68)
Syrian Arab Republic	2.84 (2.14-4)	8.92 (5.11-12.05)	2.14	0.32 (0.24-0.45)	0.38 (0.22-0.51)	0.82 (0.55-1.09)
Taiwan (Province of China)	344.67 (314.02-367.68)	1110.46 (988.5-1229.44)	2.22	12.43 (11.32-13.26)	14.75 (13.13-16.33)	-0.66 (-1.47-0.16)
Tajikistan	3.94 (2.42-6.1)	4.92 (3.34-6.82)	0.25	0.84 (0.52-1.3)	0.48 (0.33-0.66)	-2.13 (-2.5--1.76)
Thailand	1700.21 (1062.59-2214.22)	6639.84 (3389.77-9008.45)	2.91	28.65 (17.91-37.31)	34.16 (17.44-46.34)	0.37 (0.28-0.46)
Timor-Leste	1.43 (0.94-2.56)	4.4 (2.82-9.49)	2.08	3.29 (2.16-5.9)	3.1 (1.98-6.68)	-0.14 (-0.4-0.13)
Togo	0.3 (0.23-0.42)	1.25 (0.7-1.82)	3.17	0.16 (0.12-0.22)	0.2 (0.11-0.29)	1.67 (1.02-2.33)
Tokelau	0.01 (0.01-0.01)	0.01 (0-0.01)	0	3.56 (2.32-4.63)	2.77 (1.94-3.76)	-0.84 (-0.93--0.76)
Tonga	0.23 (0.14-0.31)	0.31 (0.21-0.44)	0.35	2.42 (1.49-3.3)	2.31 (1.58-3.29)	-0.18 (-0.34--0.02)
Trinidad and Tobago	13.59 (12.73-14.46)	16.6 (12.93-20.98)	0.22	9.9 (9.27-10.53)	4.77 (3.71-6.02)	-2.96 (-3.33--2.59)
Tunisia	90.95 (62.12-115.2)	255.8 (166.64-353.55)	1.81	10.45 (7.13-13.23)	10.95 (7.13-15.13)	-0.02 (-0.14-0.11)
Turkey	534.27 (375.86-672.04)	1155.08 (866-1537.92)	1.16	8.94 (6.29-11.25)	6.99 (5.24-9.31)	-0.91 (-1.07--0.75)
Turkmenistan	41.36 (36.11-47.26)	24.43 (18.69-31.78)	-0.41	12.73 (11.12-14.55)	3.45 (2.64-4.49)	-5.4 (-6.53--4.25)
Tuvalu	0.04 (0.02-0.05)	0.05 (0.03-0.06)	0.25	3.33 (1.98-4.57)	2.67 (1.86-3.45)	-0.96 (-1.06--0.86)
Uganda	35.43 (24.83-46.63)	82 (56.16-115.15)	1.31	3.39 (2.37-4.46)	3.46 (2.37-4.86)	-0.27 (-0.47--0.08)
Ukraine	728.8 (564.76-967.35)	786.66 (589.55-1011.76)	0.08	5.85 (4.53-7.76)	5.79 (4.34-7.45)	0.12 (-0.17-0.42)
United Arab Emirates	12.82 (7.75-18.65)	61.42 (44.6-87.53)	3.79	22.85 (13.8-33.23)	8.55 (6.21-12.19)	-2.05 (-2.5--1.6)
United Kingdom	1615.63 (1519.26-1662.83)	3142.11 (2804.58-3310.67)	0.94	10.88 (10.23-11.2)	14.94 (13.34-15.74)	1.7 (1.31-2.08)
United Republic of Tanzania	66.78 (47.46-86.45)	151.35 (99.44-206.76)	1.27	3.7 (2.63-4.79)	3.67 (2.41-5.02)	0.05 (0-0.09)
United States of America	7345.3 (6720.4-7670.77)	11643.14 (10470.14-12306.94)	0.59	14 (12.81-14.62)	11.61 (10.44-12.28)	-0.86 (-0.97--0.76)
United States Virgin Islands	1.35 (0.78-1.69)	1.49 (1.05-2.12)	0.1	9.66 (5.57-12.13)	4.64 (3.27-6.58)	-2.83 (-3.21--2.45)
Uruguay	200.79 (185.85-216.64)	220.34 (198.77-241.71)	0.1	29.76 (27.54-32.11)	24.37 (21.98-26.73)	-0.92 (-1.04--0.8)
Uzbekistan	22.84 (14.97-34.63)	77.86 (59.99-99.47)	2.41	1.17 (0.77-1.77)	1.67 (1.29-2.14)	1.14 (0.66-1.63)
Vanuatu	0.26 (0.15-0.35)	0.64 (0.44-0.86)	1.46	2.58 (1.51-3.5)	2.23 (1.53-3.02)	-0.71 (-0.81--0.6)
Venezuela (Bolivarian Republic of)	285.64 (270.03-298.68)	401.51 (302.04-513.24)	0.41	18.24 (17.25-19.07)	7.67 (5.77-9.81)	-3.19 (-3.56--2.83)
Viet Nam	345.08 (262.94-465.19)	1021.86 (697.43-1506.62)	1.96	4.95 (3.77-6.67)	5.85 (3.99-8.62)	0.48 (0.35-0.62)
Yemen	32.04 (19.27-59.55)	101.81 (65.79-151.55)	2.18	3.99 (2.4-7.42)	4.53 (2.93-6.74)	0.61 (0.49-0.72)
Zambia	17.17 (11.65-22.31)	43.7 (27.01-58.92)	1.55	3.73 (2.53-4.85)	4.05 (2.5-5.45)	0.18 (0.09-0.28)
Zimbabwe	31.04 (21.96-39.44)	57.08 (39.93-79.94)	0.84	4.68 (3.31-5.95)	5.16 (3.61-7.22)	0.68 (0.33-1.03)

## Sheet: Table S7
The DALY of GBTC cases and rates aged 55 years and above in 1990 and 2021 across 204 countries, and the trends from 1990 to 2021.
location		DALY cases			DALY rates
	1990_number(95%UI)	2021_number(95%UI)	percentage change(100%)	1990_per 100000(95%UI)	2021_per 100000(95%UI)	EAPC(95% CI)
Afghanistan	1955.07 (774.07-3894.52)	2519.12 (1193.99-3981.24)	0.29	160.89 (63.7-320.49)	205.01 (97.17-324.01)	1.17 (1.04-1.3)
Albania	539.72 (379.34-747.54)	998.69 (666.8-1476.96)	0.85	155.53 (109.31-215.41)	127.01 (84.8-187.84)	-0.25 (-0.43--0.07)
Algeria	7478.57 (5094.4-9880.77)	17304.66 (12457.47-22471.83)	1.31	356.97 (243.17-471.63)	284.93 (205.12-370.01)	-0.69 (-0.76--0.63)
American Samoa	2.42 (1.8-3.23)	4.13 (3.18-6.31)	0.71	66.12 (49.34-88.46)	48.89 (37.6-74.73)	-0.94 (-1.32--0.55)
Andorra	29.06 (19.95-41.77)	46.74 (31.6-64.57)	0.61	294.52 (202.2-423.31)	176.64 (119.4-244.01)	-1.37 (-1.55--1.18)
Angola	224.97 (143.01-334.55)	776.35 (508.38-1072.43)	2.45	36.12 (22.96-53.71)	40.15 (26.29-55.46)	0.56 (0.44-0.68)
Antigua and Barbuda	22.66 (20.89-24.83)	21.48 (20.21-22.84)	-0.05	262.24 (241.75-287.36)	113.83 (107.13-121.07)	-3.17 (-3.5--2.84)
Argentina	37136.49 (34532.08-39188.56)	31917.35 (29503.79-34075.07)	-0.14	667.37 (620.57-704.25)	341.97 (316.11-365.09)	-2.08 (-2.21--1.96)
Armenia	401.18 (339.4-485.16)	1376.86 (1151.44-1616.87)	2.43	82.42 (69.72-99.67)	175.04 (146.38-205.55)	2.9 (2.18-3.61)
Australia	6326.04 (5988.01-6661.27)	7909.01 (7017.3-8525.25)	0.25	192.78 (182.48-202.99)	106.77 (94.73-115.08)	-2.2 (-2.33--2.07)
Austria	9287.07 (8631.6-9821.69)	5339.87 (4780.6-5785.43)	-0.43	477.26 (443.58-504.73)	180.7 (161.77-195.77)	-3.06 (-3.31--2.81)
Azerbaijan	837.93 (538.51-1206.12)	1370.05 (802.2-2058.75)	0.64	96.07 (61.74-138.28)	71.51 (41.87-107.46)	-1.18 (-1.4--0.96)
Bahamas	65.02 (57.68-71.63)	105.99 (86.56-128.94)	0.63	264.77 (234.91-291.7)	147.29 (120.3-179.18)	-2.11 (-2.27--1.95)
Bahrain	30.64 (23.15-40.85)	109.65 (70.56-154.57)	2.58	109.22 (82.5-145.58)	67.53 (43.46-95.2)	-1.91 (-2.16--1.66)
Bangladesh	14849.17 (10941.77-22280.56)	46537.59 (31381.66-73295.52)	2.13	196.04 (144.45-294.15)	199.17 (134.3-313.68)	0.1 (-0.03-0.23)
Barbados	98.33 (89.26-106.35)	124.16 (95.44-154.06)	0.26	209.72 (190.38-226.82)	136.26 (104.74-169.07)	-1.47 (-1.63--1.31)
Belarus	3075.7 (2783.24-3414.08)	4190.7 (3366.09-5114.12)	0.36	132.86 (120.23-147.48)	145.68 (117.02-177.78)	0.03 (-0.23-0.28)
Belgium	5244.91 (4795.74-5609.09)	3528.59 (3119.4-3863.29)	-0.33	200.04 (182.91-213.93)	93.33 (82.51-102.18)	-2.62 (-2.81--2.43)
Belize	29.2 (24.89-33.69)	53.65 (46.92-61.03)	0.84	189.68 (161.72-218.89)	107.11 (93.68-121.85)	-2.32 (-2.71--1.94)
Benin	12.5 (9.76-18.24)	33.04 (19.93-44.8)	1.64	3.91 (3.05-5.7)	3.99 (2.41-5.42)	0.84 (0.25-1.43)
Bermuda	18.66 (14.72-21.37)	14.28 (12-17.75)	-0.23	176.39 (139.19-202)	61.31 (51.52-76.19)	-3.91 (-4.15--3.67)
Bhutan	82.7 (53.67-132.31)	233.85 (158.74-340.67)	1.83	208.4 (135.25-333.4)	234.82 (159.4-342.08)	0.28 (0.22-0.34)
Bolivia (Plurinational State of)	4490.22 (2577.73-6166.99)	9561.37 (6092.86-13624.61)	1.13	856.37 (491.62-1176.16)	618.67 (394.24-881.58)	-1.16 (-1.25--1.07)
Bosnia and Herzegovina	4055.16 (2560.38-4799.42)	3642.71 (2642.54-6210.07)	-0.1	552.82 (349.04-654.28)	332.59 (241.27-566.99)	-2.08 (-2.27--1.9)
Botswana	65.12 (44.12-95.71)	161.03 (110.82-244.94)	1.47	70.05 (47.46-102.94)	66.42 (45.71-101.04)	0.16 (-0.11-0.43)
Brazil	50501.8 (48035.41-52425.55)	103356.13 (95953.82-108212.33)	1.05	341.72 (325.03-354.74)	238.66 (221.56-249.87)	-1.36 (-1.5--1.21)
Brunei Darussalam	63.51 (46.06-80.6)	134.33 (106.34-175.88)	1.12	405.62 (294.18-514.82)	224.35 (177.6-293.75)	-1.69 (-1.8--1.58)
Bulgaria	3847.16 (3493.26-4178.23)	3565.2 (3000.82-4231.86)	-0.07	169.98 (154.34-184.61)	149.99 (126.25-178.04)	-0.49 (-0.74--0.23)
Burkina Faso	31.2 (23.34-41.91)	73.25 (42.44-97.96)	1.35	4.31 (3.23-5.8)	4.87 (2.82-6.52)	1.18 (0.55-1.81)
Burundi	444.8 (262.76-636.47)	637.11 (366-940.84)	0.43	118.19 (69.82-169.12)	79.59 (45.72-117.53)	-1.74 (-1.9--1.57)
Cabo Verde	5.19 (3.8-9.65)	27.87 (10.06-38.05)	4.37	13.15 (9.64-24.45)	36.36 (13.12-49.65)	3.31 (2.41-4.22)
Cambodia	914.44 (572.89-1583.27)	2410.78 (1530.13-5086.41)	1.64	123.42 (77.32-213.69)	110.9 (70.39-233.99)	-0.48 (-0.7--0.27)
Cameroon	33.44 (26.41-45.23)	97.49 (56.93-138)	1.92	4.52 (3.57-6.11)	4.79 (2.8-6.78)	0.98 (0.41-1.56)
Canada	11612.3 (10802.13-12253.53)	11946.89 (10692.2-12904.27)	0.03	212.72 (197.88-224.46)	97.36 (87.13-105.16)	-2.52 (-2.61--2.43)
Central African Republic	79.58 (50.79-125.15)	133.74 (82.47-222.53)	0.68	42.15 (26.9-66.28)	37.39 (23.06-62.21)	-0.35 (-0.4--0.3)
Chad	15.9 (11.82-23.62)	40.23 (27.01-54.03)	1.53	3.43 (2.55-5.1)	4.33 (2.91-5.82)	1.56 (1.04-2.07)
Chile	30837.59 (29069.66-32920.36)	36061.97 (32960.44-39076.57)	0.17	1833.7 (1728.57-1957.54)	805.37 (736.1-872.7)	-2.9 (-3.11--2.69)
China	319029.27 (247886.21-417487.33)	683908.08 (482234.41-886803.36)	1.14	222.29 (172.72-290.9)	180.47 (127.25-234.01)	-0.7 (-0.79--0.61)
Colombia	13838.18 (12960.27-14796.56)	24097.23 (19944.99-28318.8)	0.74	480.66 (450.17-513.95)	251.97 (208.55-296.11)	-2.33 (-2.56--2.11)
Comoros	28.53 (18.75-38.87)	70.9 (43.84-111.03)	1.49	87.91 (57.77-119.76)	87.72 (54.24-137.36)	-0.04 (-0.09-0)
Congo	84.06 (55.47-121.9)	190.86 (123.49-259.34)	1.27	47.22 (31.16-68.48)	43.92 (28.42-59.68)	-0.24 (-0.3--0.17)
Cook Islands	1.62 (0.86-2.17)	2.29 (1.52-3.41)	0.41	75.92 (40.36-101.61)	48.63 (32.19-72.28)	-1.66 (-1.85--1.48)
Costa Rica	1156.4 (1054.8-1245.94)	1872.01 (1634.44-2129.72)	0.62	406.62 (370.89-438.1)	195.52 (170.71-222.43)	-3.16 (-3.49--2.83)
Cote d'Ivoire	24.06 (18.37-31.46)	77.57 (45.06-105.12)	2.22	3.75 (2.87-4.91)	4.33 (2.51-5.86)	1.17 (0.64-1.71)
Croatia	4160.38 (3787.46-4517.43)	4419.01 (3778.85-5040.71)	0.06	373.74 (340.24-405.81)	296.31 (253.39-338)	-0.88 (-1.05--0.71)
Cuba	3058.33 (2820.09-3322.17)	3301.88 (2855.62-3741.04)	0.08	180.46 (166.41-196.03)	96.63 (83.57-109.48)	-2.24 (-2.4--2.08)
Cyprus	368.53 (265.08-470.23)	472.16 (351.16-619.87)	0.28	263.82 (189.76-336.62)	135.1 (100.47-177.36)	-2.31 (-2.41--2.22)
Czechia	20010.17 (18152.24-21919.48)	14500.8 (12272.21-17015.98)	-0.28	845.08 (766.62-925.72)	415.08 (351.29-487.08)	-2.63 (-2.75--2.51)
Democratic People's Republic of Korea	4841.74 (3251.04-8232.47)	8351.78 (5539.09-15077.48)	0.72	181.93 (122.16-309.33)	148.19 (98.28-267.53)	-0.42 (-0.55--0.3)
Democratic Republic of the Congo	865.18 (582.31-1288.79)	2023.07 (1279.38-3113.34)	1.34	32.76 (22.05-48.8)	33.5 (21.18-51.55)	0.14 (0.03-0.25)
Denmark	2164.64 (1961.89-2342.28)	2224.65 (2025.82-2411.89)	0.03	165.92 (150.38-179.54)	115.55 (105.23-125.28)	-1.56 (-1.78--1.34)
Djibouti	17.04 (11.41-25.27)	84.58 (49.35-139.47)	3.96	79.43 (53.19-117.79)	81.56 (47.59-134.49)	0.07 (0.01-0.13)
Dominica	24.22 (16.27-32.91)	25.97 (19.12-32.92)	0.07	246.73 (165.75-335.2)	172.16 (126.76-218.29)	-1.39 (-1.49--1.29)
Dominican Republic	680.54 (393.16-848.62)	1445.68 (1078.06-2089.08)	1.12	111.31 (64.31-138.8)	86.51 (64.52-125.02)	-0.5 (-0.67--0.32)
Ecuador	4518.26 (4256.16-4799.61)	8643.96 (6798.62-10817.98)	0.91	525.48 (494.99-558.2)	312.34 (245.66-390.89)	-1.61 (-1.77--1.46)
Egypt	4713.94 (3918.63-7462.9)	14873.52 (10291.12-18835.42)	2.16	105.42 (87.64-166.9)	134.41 (93-170.21)	1.41 (1.11-1.7)
El Salvador	1552.01 (1118.85-1836.44)	2743.77 (2103.91-3812.53)	0.77	317.41 (228.82-375.58)	268.32 (205.74-372.83)	-0.91 (-1.11--0.72)
Equatorial Guinea	12.42 (7.92-19.55)	31.68 (19.19-48.34)	1.55	38.9 (24.82-61.25)	40.05 (24.26-61.11)	0.28 (0.18-0.38)
Eritrea	175.25 (112.98-272.25)	463.07 (270.6-689.16)	1.64	99.17 (63.93-154.06)	105.1 (61.41-156.41)	0.26 (0.2-0.33)
Estonia	799.88 (739.43-868.28)	831.34 (714.37-944.31)	0.04	223.14 (206.27-242.22)	190.03 (163.29-215.86)	-0.94 (-1.18--0.7)
Eswatini	33.73 (23.84-48.8)	89.94 (56.55-135.74)	1.67	74.7 (52.79-108.08)	99.33 (62.46-149.92)	1.3 (0.91-1.7)
Ethiopia	6928.95 (4136.05-11082.55)	9987.22 (6781.58-14325.89)	0.44	215.65 (128.73-344.93)	145.89 (99.07-209.27)	-1.62 (-1.82--1.42)
Fiji	59.47 (43.19-78.67)	154.55 (90.4-212.1)	1.6	105.5 (76.63-139.58)	113.03 (66.11-155.11)	0.46 (0.27-0.65)
Finland	4111.19 (3758.56-4352.66)	4159.21 (3665.67-4538.74)	0.01	346.25 (316.55-366.59)	206.65 (182.13-225.51)	-1.97 (-2.31--1.63)
France	37070.08 (34312.47-39093.42)	23419.01 (20512.43-26067.51)	-0.37	266.37 (246.56-280.91)	105.92 (92.77-117.9)	-3.22 (-3.33--3.1)
Gabon	47.85 (32.7-65.68)	77.21 (49.02-104.19)	0.61	48.88 (33.4-67.09)	43.19 (27.42-58.29)	-0.51 (-0.67--0.35)
Gambia	0 (0-0)	0.01 (0-0.01)	Inf	0 (0-0.01)	0 (0-0.01)	0.1 (-0.03-0.23)
Georgia	2349.92 (1935.28-2853.29)	1877.37 (1522.34-2272.03)	-0.2	211.56 (174.23-256.88)	178.82 (145-216.41)	-1.41 (-2.5--0.31)
Germany	113722.88 (105790.07-119649.81)	70277.79 (62637.56-75809.63)	-0.38	541.97 (504.17-570.22)	223.01 (198.76-240.56)	-2.91 (-3.29--2.52)
Ghana	35.62 (26.62-48.44)	130.37 (82.05-168.63)	2.66	3.49 (2.61-4.74)	4.78 (3.01-6.18)	1.91 (1.27-2.56)
Greece	5181.21 (4883.88-5432.07)	5614.91 (5123.11-5998.29)	0.08	193.79 (182.67-203.17)	152.77 (139.39-163.2)	-0.51 (-1.18-0.17)
Greenland	21.14 (12.51-25.76)	21.39 (15.69-29.5)	0.01	383.67 (226.98-467.56)	157.53 (115.6-217.32)	-2.77 (-2.96--2.58)
Grenada	26.92 (23.06-30.7)	29.44 (25.14-33.7)	0.09	223.26 (191.25-254.54)	146.55 (125.16-167.79)	-1.48 (-1.59--1.37)
Guam	6.27 (4.48-7.71)	10.92 (8.17-14.88)	0.74	48.61 (34.72-59.78)	28.99 (21.69-39.48)	-1.21 (-1.41--1.02)
Guatemala	2819.52 (2681.65-2947.57)	3098.35 (2649.89-3588.52)	0.1	490.28 (466.3-512.54)	169.24 (144.74-196.01)	-4.31 (-4.64--3.98)
Guinea	20.7 (14.98-30.46)	39.93 (24.57-55.69)	0.93	3.74 (2.71-5.5)	4.37 (2.69-6.1)	1.23 (0.75-1.71)
Guinea-Bissau	3.26 (2.15-4.7)	6.38 (4.1-8.93)	0.96	5.11 (3.37-7.36)	5.56 (3.57-7.77)	1.04 (0.46-1.62)
Guyana	116.23 (101.78-130.64)	131.23 (102.67-166.9)	0.13	189.61 (166.04-213.12)	116.53 (91.17-148.2)	-1.76 (-1.99--1.53)
Haiti	1247.91 (684.5-1880.77)	1945.82 (1196.64-2978.05)	0.56	231.37 (126.91-348.71)	164.19 (100.98-251.29)	-1.07 (-1.11--1.03)
Honduras	848.82 (645.15-1084.28)	3835.78 (2611-5181.17)	3.52	254.66 (193.56-325.3)	364.73 (248.27-492.66)	1.26 (1.08-1.43)
Hungary	20427.31 (18802.9-21698.2)	10646.48 (9252.12-11990.73)	-0.48	793.07 (730.01-842.41)	334.78 (290.94-377.05)	-3.08 (-3.23--2.92)
Iceland	88.09 (81.22-94.94)	96.88 (84.11-108)	0.1	184.63 (170.22-198.97)	99.48 (86.37-110.9)	-2.1 (-2.18--2.03)
India	133164.67 (107833.93-196911.55)	507326.64 (345752.4-600888.06)	2.81	173.69 (140.65-256.83)	252.34 (171.98-298.88)	1.28 (1.23-1.34)
Indonesia	13597.66 (9166.41-23595.74)	29916 (19714.63-64323.67)	1.2	84.17 (56.74-146.05)	71.43 (47.07-153.59)	-0.65 (-0.69--0.61)
Iran (Islamic Republic of)	2245.17 (1739.03-3225.52)	10131.48 (5627.09-11738.1)	3.51	48.7 (37.72-69.97)	77.99 (43.32-90.36)	2.66 (2.17-3.16)
Iraq	1438.04 (1053.62-1953.46)	4028.2 (2754.76-5298.85)	1.8	113.92 (83.47-154.76)	103.68 (70.9-136.39)	-0.36 (-0.51--0.22)
Ireland	1366.32 (1271.93-1455.79)	1032.22 (904.92-1135.53)	-0.24	200.72 (186.85-213.86)	78.65 (68.95-86.53)	-3.4 (-3.72--3.09)
Israel	1668.93 (1536.5-1799.26)	1745.32 (1561.3-1919.05)	0.05	205.9 (189.56-221.98)	87.33 (78.12-96.02)	-3.13 (-3.34--2.93)
Italy	60010.62 (56307.54-62356.72)	63411.13 (56543.65-68430.59)	0.06	394.31 (369.98-409.73)	279.14 (248.91-301.23)	-1.25 (-1.36--1.14)
Jamaica	475.01 (427.6-529.85)	597.19 (456.64-759.49)	0.26	161.28 (145.18-179.9)	112.91 (86.34-143.6)	-1.44 (-1.72--1.16)
Japan	238178.15 (222939.51-246587.36)	303178.45 (256784.32-329622.99)	0.27	804.3 (752.84-832.69)	580.79 (491.92-631.45)	-1.17 (-1.27--1.07)
Jordan	388.02 (285.42-498.14)	1389.75 (946.39-1957.49)	2.58	180.46 (132.75-231.68)	110.54 (75.28-155.7)	-1.63 (-1.99--1.28)
Kazakhstan	3037.53 (2396.5-4115.14)	3606.06 (2970.73-4293.23)	0.19	145.24 (114.59-196.77)	113.63 (93.61-135.29)	-1.16 (-1.43--0.89)
Kenya	1451.12 (1080.94-2295.96)	4534.92 (3237.46-6496.06)	2.13	108.88 (81.1-172.27)	121.23 (86.55-173.66)	0.69 (0.55-0.83)
Kiribati	3.72 (2.01-4.73)	7.49 (3.84-10.17)	1.01	62.47 (33.68-79.31)	59.54 (30.53-80.87)	-0.11 (-0.2--0.02)
Kuwait	157.05 (142.45-171.4)	417.07 (338.69-498.3)	1.66	171.75 (155.79-187.46)	89.46 (72.65-106.88)	-1.71 (-2.72--0.69)
Kyrgyzstan	632.42 (537.62-751.72)	956.18 (777.52-1164.7)	0.51	122.82 (104.41-145.99)	113.06 (91.93-137.71)	-2.54 (-3.73--1.35)
Lao People's Democratic Republic	443.29 (239.6-747.72)	687.26 (433.21-1511.87)	0.55	129.26 (69.87-218.04)	88.89 (56.03-195.55)	-1.33 (-1.47--1.2)
Latvia	813.12 (745.5-881.92)	918.16 (793.54-1057.13)	0.13	130.05 (119.23-141.05)	139.53 (120.59-160.65)	-0.09 (-0.28-0.1)
Lebanon	714.03 (424.82-964.8)	1433.73 (886.05-1902.8)	1.01	188.33 (112.05-254.48)	146.29 (90.41-194.16)	-0.5 (-0.71--0.27)
Lesotho	79.42 (53.91-125.58)	187.34 (122.52-281.9)	1.36	56.79 (38.55-89.8)	103.76 (67.86-156.13)	2.76 (2.34-3.17)
Liberia	7.64 (5.85-10.29)	13.07 (7.57-18.61)	0.71	4.06 (3.11-5.46)	3.96 (2.29-5.64)	0.77 (0.14-1.41)
Libya	1151.39 (859.14-1602.57)	2970.46 (2026.4-4028.76)	1.58	370.19 (276.22-515.24)	355.18 (242.3-481.73)	0.28 (0.08-0.47)
Lithuania	1561.23 (1421.07-1686.63)	1959.05 (1698.6-2231.4)	0.25	197.01 (179.33-212.84)	202.43 (175.52-230.57)	-0.62 (-1.07--0.16)
Luxembourg	222.27 (208.21-235.17)	182.19 (161.95-201.68)	-0.18	238.01 (222.96-251.82)	102.52 (91.14-113.49)	-2.56 (-2.72--2.41)
Madagascar	653.2 (462.4-851.12)	1252.94 (766.37-1751.22)	0.92	77.31 (54.73-100.73)	67.85 (41.5-94.83)	-0.48 (-0.55--0.4)
Malawi	184.37 (123.86-233.73)	334.77 (201.92-488.99)	0.82	29.31 (19.69-37.16)	28.63 (17.27-41.82)	-0.24 (-0.37--0.11)
Malaysia	2126.55 (1192.38-2605.49)	5657.38 (3587.94-6880.97)	1.66	144.09 (80.79-176.54)	115.39 (73.18-140.35)	-1.15 (-1.36--0.93)
Maldives	17.39 (9.11-24.44)	28.05 (19.98-36.1)	0.61	113.46 (59.41-159.41)	51.56 (36.73-66.37)	-2.9 (-3.05--2.74)
Mali	174.03 (134.57-256.12)	375.31 (263.91-572.3)	1.16	26.03 (20.13-38.3)	25.93 (18.23-39.54)	0.59 (0.33-0.85)
Malta	113.79 (104.57-123.75)	130.04 (114-145.48)	0.14	157.06 (144.34-170.82)	82.41 (72.24-92.19)	-2.48 (-2.63--2.33)
Marshall Islands	2.09 (1.23-2.78)	3.88 (2.49-5.45)	0.86	81.8 (48.31-108.88)	66.22 (42.48-93)	-0.85 (-0.91--0.79)
Mauritania	7.31 (5.52-10.24)	15.01 (8.98-21.85)	1.05	4.4 (3.32-6.17)	4.18 (2.5-6.09)	0.45 (-0.19-1.1)
Mauritius	237.04 (224.37-250.93)	274.8 (252.84-293.2)	0.16	194.88 (184.46-206.3)	81.22 (74.73-86.66)	-4.36 (-5.88--2.81)
Mexico	35090.15 (34113.49-35829.22)	49346.65 (43314.71-55336)	0.41	504.7 (490.65-515.33)	228.98 (200.99-256.77)	-2.96 (-3.15--2.76)
Micronesia (Federated States of)	7.37 (4.54-9.81)	8.87 (5.89-12.38)	0.2	92.58 (57.06-123.26)	67.44 (44.78-94.1)	-1.2 (-1.28--1.13)
Monaco	9.14 (5.94-11.65)	10.29 (7.56-14)	0.13	82.44 (53.57-105.08)	65.78 (48.29-89.5)	-0.72 (-0.79--0.65)
Mongolia	677.97 (445.52-1025.58)	1152.84 (829.33-1735.19)	0.7	391.25 (257.11-591.85)	292 (210.06-439.51)	-1.1 (-1.24--0.96)
Montenegro	166.71 (117.61-221.45)	275.3 (197.01-371.55)	0.65	153.03 (107.95-203.28)	157.88 (112.98-213.08)	0.08 (-0.15-0.31)
Morocco	1698.03 (1001.92-2131.29)	4294.17 (2477.11-5514.92)	1.53	72.42 (42.73-90.89)	71.47 (41.23-91.79)	0.06 (0.01-0.12)
Mozambique	784.03 (488.15-1101.64)	1735.29 (958.52-2588.71)	1.21	80.23 (49.95-112.74)	96.99 (53.57-144.69)	1 (0.86-1.14)
Myanmar	4261.07 (2620.5-7468.65)	6284.81 (4053.32-13239.66)	0.47	108.85 (66.94-190.79)	74.45 (48.01-156.83)	-1.45 (-1.56--1.34)
Namibia	61.51 (43.77-80.18)	129.83 (85.68-185.87)	1.11	56.69 (40.34-73.89)	57.46 (37.92-82.26)	-0.19 (-0.44-0.06)
Nauru	0.79 (0.47-1.1)	0.84 (0.49-1.2)	0.06	109.02 (65.57-152.66)	91.33 (53.39-129.5)	-0.74 (-0.85--0.62)
Nepal	2917.4 (2067.16-4702.36)	9327.1 (6807.46-12905.07)	2.2	189.53 (134.29-305.48)	235.66 (172-326.06)	0.82 (0.66-0.98)
Netherlands	9508.03 (8824.92-10019.6)	8894.35 (7937-9698.31)	-0.06	287.17 (266.54-302.62)	152.02 (135.65-165.76)	-1.9 (-2.18--1.63)
New Zealand	1128.61 (1045.08-1205.25)	2415.76 (2158.17-2623.36)	1.14	171.53 (158.83-183.18)	169.36 (151.3-183.91)	-0.36 (-0.85-0.14)
Nicaragua	833.57 (543.22-999.24)	1860.83 (1440.28-2934.31)	1.23	335.48 (218.62-402.15)	228.59 (176.93-360.47)	-1.32 (-1.44--1.2)
Niger	14.86 (11.17-21.67)	51.16 (31.89-73.67)	2.44	3.38 (2.54-4.93)	3.67 (2.29-5.29)	0.91 (0.26-1.56)
Nigeria	297.37 (223.14-414.59)	681.45 (454.5-955.24)	1.29	4.08 (3.06-5.69)	4.54 (3.03-6.37)	0.75 (0.49-1.01)
Niue	0.3 (0.19-0.38)	0.25 (0.17-0.33)	-0.17	82.41 (52.91-103.35)	64.57 (44.64-83.15)	-0.9 (-0.93--0.87)
North Macedonia	999.93 (753.13-1295.82)	1448.65 (1056.02-1875.76)	0.45	303.96 (228.94-393.91)	244.33 (178.11-316.37)	-0.99 (-1.21--0.77)
Northern Mariana Islands	1.04 (0.76-1.98)	3.81 (2.98-6.91)	2.66	42.5 (31.01-81.06)	39.16 (30.66-71.12)	-0.01 (-0.58-0.57)
Norway	1798.72 (1691.69-1875.57)	1680.49 (1504.86-1789.69)	-0.07	166.1 (156.21-173.19)	103.62 (92.79-110.36)	-2.04 (-2.36--1.73)
Oman	107.5 (71.34-146.52)	202 (142.05-278.7)	0.88	106.96 (70.98-145.78)	64.67 (45.48-89.22)	-1.23 (-1.45--1.01)
Pakistan	29490.02 (22614.51-39946.24)	70000.9 (50602.19-93257.54)	1.37	323.37 (247.98-438.03)	353.08 (255.23-470.38)	-0.06 (-0.27-0.15)
Palau	0.88 (0.58-1.24)	1.95 (1.25-2.86)	1.22	54.95 (36.12-77.58)	46.59 (29.76-68.2)	-0.55 (-0.61--0.49)
Palestine	250.46 (165.38-335.24)	530.6 (338.42-669.13)	1.12	172.56 (113.94-230.97)	123.32 (78.65-155.52)	-0.98 (-1.19--0.77)
Panama	681.31 (633.05-734.47)	930.52 (739.76-1115.73)	0.37	281.2 (261.28-303.14)	125.14 (99.49-150.05)	-2.61 (-2.8--2.42)
Papua New Guinea	185.15 (102.21-259.24)	394.26 (261.68-567.45)	1.13	62.58 (34.55-87.62)	48 (31.86-69.09)	-1.01 (-1.08--0.95)
Paraguay	745.62 (541.54-948.96)	1947.41 (1351.37-2687.57)	1.61	205.53 (149.28-261.59)	196.69 (136.49-271.44)	-0.23 (-0.32--0.14)
Peru	9775.25 (6821.55-11954.96)	24035.4 (16555.51-34168.64)	1.46	495.77 (345.97-606.32)	429.71 (295.98-610.87)	-0.89 (-1.16--0.61)
Philippines	2263.52 (1789.66-3774.84)	7415.47 (5811.45-13214.77)	2.28	47.41 (37.49-79.07)	53.18 (41.67-94.76)	0.42 (0.38-0.45)
Poland	43311.97 (41542.1-44737.9)	40416.23 (36753.85-43729.63)	-0.07	562.06 (539.09-580.56)	333.6 (303.37-360.94)	-2.08 (-2.23--1.92)
Portugal	6320.91 (5866.44-6680.84)	6060.49 (5386.13-6592.93)	-0.04	259.27 (240.63-274.03)	155.77 (138.44-169.46)	-1.78 (-1.93--1.64)
Puerto Rico	906.9 (837.86-983.06)	802.2 (656.02-945.48)	-0.12	149.47 (138.09-162.02)	68.72 (56.2-80.99)	-3.05 (-3.26--2.83)
Qatar	28.11 (20.84-37.63)	140.87 (93.22-224.17)	4.01	172.06 (127.58-230.34)	91.96 (60.86-146.34)	-1.96 (-2.36--1.55)
Republic of Korea	51699.18 (34684.69-64735.59)	92635.21 (57630.93-116711.35)	0.79	1038.81 (696.93-1300.76)	553.91 (344.61-697.88)	-2.18 (-2.27--2.09)
Republic of Moldova	1286.36 (1170.46-1399.13)	1034.86 (934.34-1151.26)	-0.2	166.62 (151.61-181.23)	98.01 (88.49-109.04)	-1.66 (-1.98--1.35)
Romania	13535.05 (12433.55-14482.58)	10725.44 (9317.84-12234.85)	-0.21	270.49 (248.48-289.43)	178.6 (155.16-203.73)	-1.18 (-1.47--0.89)
Russian Federation	58042.76 (56033.79-59646.36)	64123.98 (58827.08-69358.84)	0.1	183.9 (177.53-188.98)	150.86 (138.4-163.18)	-1.42 (-1.81--1.02)
Rwanda	624.52 (388.74-834.43)	1041.47 (678.43-1465.08)	0.67	133.46 (83.07-178.32)	98.49 (64.16-138.55)	-1.71 (-1.97--1.45)
Saint Kitts and Nevis	16.28 (13.4-18.17)	12.6 (10.31-14.99)	-0.23	254.63 (209.61-284.09)	97.83 (80.04-116.37)	-3.25 (-3.43--3.06)
Saint Lucia	26.09 (22.03-28.98)	34.53 (27.82-41.64)	0.32	178.33 (150.61-198.1)	82.06 (66.1-98.94)	-3.16 (-3.48--2.84)
Saint Vincent and the Grenadines	22.47 (20.66-24.48)	22.3 (19.74-25.47)	-0.01	187.03 (171.92-203.79)	87.72 (77.63-100.16)	-2.82 (-3.07--2.57)
Samoa	11.12 (6.94-14.52)	15.91 (10.88-21.16)	0.43	77.16 (48.15-100.74)	64.62 (44.2-85.96)	-0.69 (-0.75--0.62)
San Marino	18.06 (13.73-23.52)	16.76 (10.38-24.65)	-0.07	307.57 (233.74-400.45)	141.72 (87.75-208.41)	-1.65 (-1.98--1.33)
Sao Tome and Principe	16.08 (10.72-20.37)	29.51 (18.38-39.04)	0.84	143.63 (95.74-181.96)	161.38 (100.53-213.54)	0.44 (0.28-0.61)
Saudi Arabia	1549.94 (1104.38-2537.02)	4355.57 (3236.4-6489.36)	1.81	173.97 (123.96-284.77)	144.67 (107.5-215.54)	-0.52 (-0.73--0.31)
Senegal	19.81 (14.84-27.08)	56.79 (34.31-81.81)	1.87	3.75 (2.81-5.12)	4.4 (2.66-6.34)	1.3 (0.66-1.95)
Serbia	5986.92 (3991.47-7913.28)	6960.63 (4861.37-9278.75)	0.16	287.87 (191.92-380.49)	248.13 (173.3-330.77)	-0.94 (-1.16--0.71)
Seychelles	16.73 (9.59-20.15)	18.01 (14.36-26.17)	0.08	174.45 (99.93-210.06)	86.83 (69.23-126.14)	-2.77 (-3.17--2.37)
Sierra Leone	11.95 (8.54-15.98)	25.78 (15.22-35.35)	1.16	3.61 (2.58-4.82)	4.27 (2.52-5.85)	1.48 (0.91-2.05)
Singapore	712.32 (661.17-766.49)	1459.54 (1314.12-1580.29)	1.05	196.46 (182.36-211.41)	96.1 (86.52-104.05)	-2.69 (-2.89--2.5)
Slovakia	6274.21 (4506.57-8068.81)	6734.6 (4884.23-9156.01)	0.07	604.77 (434.39-777.75)	410.58 (297.77-558.2)	-1.51 (-1.62--1.4)
Slovenia	1906.67 (1728.48-2090.69)	1912.32 (1620.98-2218.68)	0	442.69 (401.31-485.41)	261.18 (221.39-303.02)	-2 (-2.14--1.85)
Solomon Islands	16.07 (7.77-23.08)	33.72 (21.39-48.4)	1.1	71.07 (34.36-102.07)	62.16 (39.44-89.23)	-0.47 (-0.61--0.33)
Somalia	304.88 (194.74-492.7)	855.15 (487.53-1435.88)	1.8	84.67 (54.08-136.83)	90.68 (51.7-152.26)	0.25 (0.22-0.27)
South Africa	2168.75 (1464.74-3144.92)	6600.21 (4296.66-7790.35)	2.04	64.25 (43.39-93.17)	83.67 (54.47-98.76)	0.86 (0.64-1.08)
South Sudan	339.61 (227.27-484.78)	526.2 (322.71-789.17)	0.55	81.89 (54.8-116.9)	84.5 (51.82-126.73)	0.07 (-0.07-0.21)
Spain	27436.63 (25094-28956.52)	23532.18 (20368.4-25846.42)	-0.14	286.98 (262.47-302.87)	152.06 (131.62-167.02)	-2.26 (-2.43--2.09)
Sri Lanka	4554.57 (1782.48-6141.16)	3722.07 (2235-6749.75)	-0.18	255.91 (100.15-345.05)	77.28 (46.4-140.14)	-5.49 (-6.3--4.68)
Sudan	1420.04 (802.44-2836.83)	2883.77 (1962.2-4247.11)	1.03	95.49 (53.96-190.77)	92.61 (63.02-136.39)	0.08 (-0.01-0.17)
Suriname	61.98 (42.65-77.14)	108.49 (76.55-148.72)	0.75	142.44 (98.01-177.27)	97.12 (68.53-133.14)	-1.21 (-1.37--1.04)
Sweden	11986.76 (11066.16-12657.03)	9518.89 (8293.27-10624.47)	-0.21	504.9 (466.13-533.14)	282.76 (246.35-315.6)	-2.24 (-2.67--1.8)
Switzerland	2511.15 (2299.02-2675.2)	3370.22 (2909.29-3826.91)	0.34	148.66 (136.1-158.37)	114.99 (99.26-130.57)	-1.13 (-1.4--0.85)
Syrian Arab Republic	66.72 (50.1-93.53)	189.66 (106.98-257.57)	1.84	7.57 (5.68-10.61)	8.03 (4.53-10.9)	0.42 (0.16-0.68)
Taiwan (Province of China)	7401.31 (6771.5-7895.62)	16237.24 (14610.84-17854.23)	1.19	266.85 (244.14-284.67)	215.64 (194.04-237.11)	-1.91 (-2.63--1.19)
Tajikistan	94.9 (59.76-139.99)	124.88 (85.71-172.72)	0.32	20.26 (12.76-29.89)	12.16 (8.34-16.82)	-1.99 (-2.27--1.7)
Thailand	40241.54 (24658.74-52310.7)	130620 (63063.32-179216.67)	2.25	678.12 (415.53-881.5)	671.98 (324.43-921.99)	-0.26 (-0.34--0.17)
Timor-Leste	37.01 (23.9-65.94)	103.75 (66.07-223.08)	1.8	85.14 (54.99-151.72)	73.05 (46.52-157.06)	-0.46 (-0.72--0.2)
Togo	7.43 (5.5-10.5)	28.33 (17-41.62)	2.81	3.81 (2.82-5.38)	4.54 (2.72-6.66)	1.37 (0.73-2.02)
Tokelau	0.2 (0.13-0.26)	0.15 (0.11-0.21)	-0.25	82.83 (54.61-108.91)	59.59 (41.6-81.14)	-1.14 (-1.2--1.07)
Tonga	5.52 (3.4-7.49)	6.82 (4.7-9.65)	0.24	58.22 (35.79-78.95)	50.77 (34.98-71.89)	-0.49 (-0.63--0.35)
Trinidad and Tobago	309.54 (289.97-329.8)	365.87 (285.3-465.63)	0.18	225.45 (211.19-240.21)	105.03 (81.9-133.67)	-3.06 (-3.43--2.69)
Tunisia	2054.86 (1398.01-2626.15)	5013.59 (3324.88-6963.85)	1.44	235.99 (160.56-301.61)	214.52 (142.26-297.97)	-0.48 (-0.59--0.37)
Turkey	12509.64 (8663.3-15955.86)	22024.18 (16373.95-29925.57)	0.76	209.38 (145-267.07)	133.31 (99.11-181.13)	-1.73 (-1.89--1.56)
Turkmenistan	1031.55 (897.38-1175.28)	618.09 (474.73-813.95)	-0.4	317.62 (276.31-361.88)	87.34 (67.08-115.01)	-5.36 (-6.53--4.18)
Tuvalu	0.98 (0.58-1.35)	1.15 (0.8-1.49)	0.17	84.33 (50.24-116.53)	63.26 (44.02-81.86)	-1.1 (-1.17--1.02)
Uganda	857.94 (600.54-1139.21)	1959.52 (1313.39-2769.24)	1.28	82.03 (57.42-108.92)	82.63 (55.38-116.77)	-0.38 (-0.61--0.15)
Ukraine	15716.12 (12027.49-21080.3)	15650.58 (11636.32-20296.93)	0	126.06 (96.47-169.09)	115.26 (85.7-149.48)	-0.29 (-0.55--0.04)
United Arab Emirates	311.92 (184.99-458.39)	1426.2 (1037.19-2029.24)	3.57	555.75 (329.61-816.72)	198.61 (144.44-282.59)	-2.29 (-2.73--1.86)
United Kingdom	19534.68 (18601.74-20052.27)	23353.77 (21332.91-24537.18)	0.2	131.52 (125.24-135)	111.05 (101.44-116.68)	-0.07 (-0.5-0.35)
United Republic of Tanzania	1640.69 (1158.98-2147.28)	3597.86 (2376.37-5055.89)	1.19	90.94 (64.24-119.02)	87.28 (57.65-122.65)	-0.09 (-0.13--0.04)
United States of America	76109.15 (71377.66-78938.66)	94063.33 (87052.68-98677.53)	0.24	145.07 (136.06-150.47)	93.83 (86.84-98.43)	-1.58 (-1.76--1.41)
United States Virgin Islands	30.6 (17.76-38.5)	29.86 (21.21-41.84)	-0.02	219.08 (127.19-275.63)	92.76 (65.88-130)	-3.14 (-3.5--2.79)
Uruguay	4087.15 (3792.66-4375.6)	3873.17 (3517.75-4225.21)	-0.05	605.71 (562.07-648.46)	428.31 (389.01-467.24)	-1.39 (-1.51--1.27)
Uzbekistan	538.93 (369.5-796.1)	1959.01 (1517.86-2521.68)	2.63	27.56 (18.89-40.71)	42.14 (32.65-54.25)	1.31 (0.78-1.84)
Vanuatu	6.52 (3.78-8.82)	16.02 (11.07-21.94)	1.46	65.44 (37.9-88.48)	55.87 (38.59-76.53)	-0.71 (-0.82--0.6)
Venezuela (Bolivarian Republic of)	6636.81 (6302.6-6937.61)	8747.38 (6446.93-11296.87)	0.32	423.84 (402.5-443.05)	167.18 (123.22-215.91)	-3.44 (-3.83--3.05)
Viet Nam	8023.15 (6065.92-10788.13)	21457.7 (14632.78-32197.57)	1.67	115.08 (87-154.73)	122.84 (83.77-184.32)	0.15 (0.07-0.24)
Yemen	804.67 (473.14-1499.24)	2444.17 (1560.39-3673.93)	2.04	100.33 (58.99-186.93)	108.68 (69.38-163.36)	0.45 (0.33-0.57)
Zambia	429.92 (289.58-560.11)	1066.64 (655.13-1444.44)	1.48	93.39 (62.91-121.68)	98.75 (60.65-133.73)	0.04 (-0.06-0.14)
Zimbabwe	740.35 (525.76-955.25)	1425.85 (984-1992.81)	0.93	111.7 (79.32-144.12)	128.77 (88.87-179.97)	0.94 (0.58-1.29)

## Sheet: Table S8
The death of GBTC cases and rates aged 55 years and above in 1990 and 2021 across 9 age groups globally and in 5 territories, and the trends from 1990 to 2021.
location	Age(years)	Death cases			Death rates
		1990_number(95%UI)	2021_number(95%UI)	percentage change(100%)	1990_per 100000(95%UI)	2021_per 100000(95%UI)	EAPC(95% CI)
	55-59	8697.38 (7432.96-9977.08)	13121.75 (10287.92-15575.04)	0.51 (0.38-0.56)	4.7 (4.01-5.39)	3.32 (2.6-3.94)	-1.24 (-1.33--1.15)
	55+	86386.38 (77436.32-95543.88)	155076.88 (129702.64-174512.2)	0.8 (0.67-0.83)	12.87 (11.53-14.23)	10.44 (8.73-11.74)	-0.77 (-0.81--0.73)
	60-64	12230.55 (10728.51-13845.49)	17604.1 (14337.19-19938.89)	0.44 (0.34-0.44)	7.62 (6.68-8.62)	5.5 (4.48-6.23)	-1.15 (-1.2--1.09)
	65-69	14326.43 (12851.55-16167.42)	22841.04 (18502.16-26291)	0.59 (0.44-0.63)	11.59 (10.4-13.08)	8.28 (6.71-9.53)	-1.19 (-1.24--1.14)
Global	70-74	14400.41 (12921.58-16319.46)	26047.03 (21447.71-30072.95)	0.81 (0.66-0.84)	17.01 (15.26-19.28)	12.65 (10.42-14.61)	-1.11 (-1.16--1.07)
	75-79	15683.79 (14220.27-17030.09)	23947.78 (20092.04-27143.55)	0.53 (0.41-0.59)	25.48 (23.1-27.67)	18.16 (15.23-20.58)	-1.11 (-1.16--1.05)
	80-84	11971.99 (10655.68-12915.96)	22215.17 (18447.42-24763.74)	0.86 (0.73-0.92)	33.84 (30.12-36.51)	25.36 (21.06-28.27)	-0.98 (-1.04--0.92)
	85-89	6461.14 (5600.83-7029.2)	16927.6 (13978.96-19173.71)	1.62 (1.5-1.73)	42.76 (37.06-46.52)	37.02 (30.57-41.94)	-0.55 (-0.61--0.49)
	90-94	2151.67 (1783.45-2375.99)	8980.84 (6951.55-10361.73)	3.17 (2.9-3.36)	50.21 (41.62-55.45)	50.2 (38.86-57.92)	-0.03 (-0.1-0.04)
	95+	463.01 (353.66-524.83)	3391.58 (2330.2-4023.82)	6.33 (5.59-6.67)	45.48 (34.74-51.55)	62.23 (42.75-73.83)	1.08 (1-1.16)
	55-59	300.84 (222.61-420.19)	683.56 (456.87-877.92)	1.27 (1.05-1.09)	2.57 (1.9-3.59)	2.7 (1.8-3.47)	0.01 (-0.11-0.12)
	55+	1872.45 (1499.94-2610.86)	5270.93 (3616.93-6428.31)	1.81 (1.41-1.46)	5.02 (4.02-7)	6.42 (4.41-7.83)	0.93 (0.87-1)
	60-64	388.14 (302.63-547.24)	886.75 (614.43-1125.33)	1.28 (1.03-1.06)	4.16 (3.24-5.86)	4.5 (3.12-5.71)	0.28 (0.17-0.39)
	65-69	397.55 (303.57-553.58)	1026.6 (685.07-1279.52)	1.58 (1.26-1.31)	5.72 (4.37-7.96)	6.81 (4.54-8.49)	0.71 (0.62-0.8)
	70-74	348.53 (283.18-475.33)	1075.75 (739.1-1355.03)	2.09 (1.61-1.85)	7.37 (5.99-10.05)	10.37 (7.13-13.07)	1.31 (1.22-1.41)
Low SDI	75-79	236.4 (186.96-331.08)	749.21 (512.41-930.24)	2.17 (1.74-1.81)	8.71 (6.89-12.2)	11.67 (7.98-14.49)	1.19 (1.1-1.29)
	80-84	134.16 (106.02-190.8)	530.35 (363.2-653.26)	2.95 (2.43-2.42)	10.33 (8.16-14.69)	15.72 (10.77-19.37)	1.63 (1.39-1.86)
	85-89	52.45 (40.29-75.89)	245.11 (165.58-310.09)	3.67 (3.11-3.09)	11.51 (8.84-16.66)	18.36 (12.4-23.23)	1.66 (1.36-1.95)
	90-94	12.36 (8.88-18.3)	64.37 (43.83-84.65)	4.21 (3.94-3.63)	10.93 (7.85-16.18)	17.96 (12.23-23.61)	1.94 (1.61-2.27)
	95+	2.02 (1.4-3.24)	9.24 (6.07-12.75)	3.57 (3.34-2.94)	8.42 (5.83-13.49)	12.14 (7.98-16.76)	2.04 (1.66-2.43)
	55-59	1129.6 (929.08-1640.88)	2949.95 (2178.83-3725.24)	1.61 (1.35-1.27)	3.63 (2.99-5.28)	4.25 (3.14-5.36)	0.49 (0.42-0.56)
	55+	7465.34 (6394.91-10757.07)	22456.96 (17705.69-27976.3)	2.01 (1.77-1.6)	7.41 (6.34-10.67)	9.32 (7.34-11.6)	0.82 (0.76-0.89)
	60-64	1481.62 (1239.25-2119.13)	3702.69 (2829.95-4499.93)	1.5 (1.28-1.12)	5.85 (4.9-8.37)	6.48 (4.95-7.87)	0.44 (0.36-0.52)
	65-69	1453.43 (1215.25-2082.87)	4186.47 (3250.95-5248.96)	1.88 (1.68-1.52)	8 (6.69-11.46)	9.44 (7.33-11.83)	0.64 (0.56-0.72)
Low-middle SDI	70-74	1314.68 (1082.88-1910.48)	4232.63 (3298.44-5238.06)	2.22 (2.05-1.74)	10.7 (8.81-15.55)	13.46 (10.49-16.66)	0.73 (0.64-0.82)
	75-79	993.11 (845.34-1398.63)	3147.07 (2547.02-4050.14)	2.17 (2.01-1.9)	13.1 (11.15-18.45)	15.67 (12.68-20.17)	0.65 (0.6-0.71)
	80-84	664.55 (551.62-931.97)	2429.96 (1941.09-3066.4)	2.66 (2.52-2.29)	15.97 (13.25-22.39)	21.13 (16.88-26.66)	1.06 (0.96-1.17)
	85-89	318.1 (260.17-446.79)	1264.58 (997.84-1613.15)	2.98 (2.84-2.61)	19.24 (15.73-27.02)	25.31 (19.97-32.28)	1.05 (0.93-1.18)
	90-94	91.76 (72.76-129.32)	443.91 (346.9-584.43)	3.84 (3.77-3.52)	20.79 (16.48-29.29)	27.43 (21.44-36.12)	1.1 (0.94-1.25)
	95+	18.5 (13.96-25.7)	99.7 (72.18-128.71)	4.39 (4.17-4.01)	18.31 (13.82-25.44)	21.98 (15.92-28.38)	0.89 (0.72-1.06)
	55-59	2301.46 (1935.98-2931.23)	4589.21 (3591.87-5754.36)	0.99 (0.86-0.96)	4.33 (3.64-5.51)	3.33 (2.6-4.17)	-0.99 (-1.11--0.87)
	55+	16530.29 (14550.79-21389.84)	40618.56 (33079.4-51794.03)	1.46 (1.27-1.42)	9.52 (8.38-12.32)	8.64 (7.04-11.02)	-0.43 (-0.48--0.38)
	60-64	2883.63 (2441.05-3623.39)	5702.37 (4515.35-6801.54)	0.98 (0.85-0.88)	6.73 (5.7-8.46)	5.6 (4.44-6.68)	-0.75 (-0.83--0.67)
	65-69	3052.84 (2656.51-4003.28)	7172.64 (5737.79-9146.45)	1.35 (1.16-1.28)	9.58 (8.34-12.56)	8.05 (6.44-10.26)	-0.69 (-0.74--0.64)
Middle SDI	70-74	3017.34 (2602.38-3972.78)	7336.67 (5965.17-9514.99)	1.43 (1.29-1.4)	13.81 (11.91-18.18)	11.9 (9.68-15.44)	-0.56 (-0.61--0.51)
	75-79	2520.49 (2203.85-3292.81)	6351.47 (5249.45-8364.91)	1.52 (1.38-1.54)	18.85 (16.48-24.63)	16.21 (13.4-21.35)	-0.51 (-0.57--0.46)
	80-84	1648.41 (1407.84-2104.26)	4969.95 (4067.8-6185.97)	2.01 (1.89-1.94)	23.79 (20.31-30.36)	20.86 (17.08-25.97)	-0.55 (-0.62--0.48)
	85-89	847.86 (719.4-1039.19)	3075.61 (2460.27-3934.52)	2.63 (2.42-2.79)	31.08 (26.37-38.09)	26.82 (21.45-34.31)	-0.55 (-0.62--0.48)
	90-94	217.19 (175.55-264.86)	1134.19 (881.08-1453.07)	4.22 (4.02-4.49)	32.81 (26.52-40.01)	29.42 (22.85-37.69)	-0.47 (-0.56--0.38)
	95+	41.06 (31.57-52.78)	286.45 (206.3-359.81)	5.98 (5.53-5.82)	27.96 (21.5-35.94)	27.53 (19.83-34.58)	-0.15 (-0.3-0)
	55-59	2369.16 (1965.78-2614.87)	2979.84 (2213.02-3522.21)	0.26 (0.13-0.35)	5.1 (4.23-5.62)	3.31 (2.46-3.92)	-1.53 (-1.62--1.44)
	55+	23151.57 (20243.86-24815.96)	35957.08 (28256.06-41125)	0.55 (0.4-0.66)	13.42 (11.73-14.38)	10.37 (8.15-11.86)	-0.97 (-1.08--0.86)
	60-64	3491.11 (3018.67-3782.58)	4067.43 (3136.93-4708.34)	0.17 (0.04-0.24)	8.11 (7.01-8.79)	5.58 (4.3-6.46)	-1.32 (-1.41--1.24)
	65-69	3977.16 (3398.13-4289.27)	5570.25 (4251.82-6548.17)	0.4 (0.25-0.53)	12.62 (10.78-13.61)	8.39 (6.4-9.86)	-1.38 (-1.47--1.3)
High-middle SDI	70-74	3896.5 (3375.99-4226.96)	6347.24 (4915.28-7353.67)	0.63 (0.46-0.74)	18.87 (16.35-20.47)	12.99 (10.06-15.05)	-1.31 (-1.37--1.25)
	75-79	4368.65 (3836.1-4693.17)	5801.54 (4527.34-6801.88)	0.33 (0.18-0.45)	26.25 (23.05-28.2)	19.42 (15.16-22.77)	-1.19 (-1.27--1.12)
	80-84	3050.26 (2668.94-3283.45)	5371.42 (4278.58-6073.02)	0.76 (0.6-0.85)	32.77 (28.67-35.28)	24.6 (19.6-27.82)	-1.08 (-1.16--1)
	85-89	1457.38 (1254.02-1594.09)	3784.7 (3021.39-4345.55)	1.6 (1.41-1.73)	38.97 (33.53-42.63)	33.27 (26.56-38.2)	-0.73 (-0.9--0.56)
	90-94	448.29 (381.03-495.14)	1619.85 (1287.24-1870.03)	2.61 (2.38-2.78)	48.19 (40.96-53.23)	37.05 (29.44-42.78)	-0.9 (-1.04--0.75)
	95+	93.08 (72.6-105.12)	414.82 (307.5-481.7)	3.46 (3.24-3.58)	49.36 (38.5-55.74)	37.58 (27.86-43.64)	-0.96 (-1.1--0.83)
	55-59	2584.27 (2358.17-2739.92)	1909.88 (1664.94-2068.12)	-0.26 (-0.29--0.25)	6.07 (5.54-6.44)	2.63 (2.29-2.84)	-2.82 (-2.94--2.7)
	55+	37233.76 (34361.64-38934.67)	50641.07 (43444.24-55944.3)	0.36 (0.26-0.44)	19.97 (18.43-20.88)	14.68 (12.59-16.22)	-1.15 (-1.22--1.09)
	60-64	3967.54 (3697.22-4164.36)	3229.85 (2797.18-3526.21)	-0.19 (-0.24--0.15)	9.94 (9.26-10.44)	4.74 (4.1-5.17)	-2.59 (-2.71--2.47)
	65-69	5421.55 (5087.84-5676.78)	4864.16 (4235.73-5311.3)	-0.1 (-0.17--0.06)	15.51 (14.56-16.24)	8.02 (6.99-8.76)	-2.4 (-2.51--2.29)
High SDI	70-74	5804.22 (5412.82-6068.9)	7030.7 (6281.48-7600.79)	0.21 (0.16-0.25)	23.17 (21.61-24.23)	13.18 (11.77-14.24)	-2.04 (-2.14--1.94)
	75-79	7538.86 (6968.07-7905.26)	7876.74 (6902.5-8676.75)	0.04 (-0.01-0.1)	35.61 (32.91-37.34)	21.75 (19.06-23.96)	-1.56 (-1.62--1.49)
	80-84	6454.63 (5696-6906.98)	8893.81 (7467.51-9999.05)	0.38 (0.31-0.45)	47.35 (41.79-50.67)	32.97 (27.69-37.07)	-1.16 (-1.24--1.08)
	85-89	3775.7 (3201.04-4098.05)	8543.93 (6705.17-9771.38)	1.26 (1.09-1.38)	57.96 (49.14-62.91)	51.79 (40.64-59.23)	-0.44 (-0.53--0.35)
	90-94	1379.13 (1112.95-1523.97)	5712.47 (4213.79-6606.34)	3.14 (2.79-3.33)	64.64 (52.17-71.43)	74.51 (54.96-86.17)	0.4 (0.32-0.48)
	95+	307.86 (229.3-351.2)	2579.52 (1723.47-3105.95)	7.38 (6.52-7.84)	55.31 (41.2-63.1)	93.12 (62.21-112.12)	1.89 (1.75-2.03)

## Sheet: Table S9
The incidence of GBTC cases and rates aged 55 years and above in 1990 and 2021 across 9 age groups globally and in 5 territories, and the trends from 1990 to 2021.
location	Age(years)	Incidence cases			Incidence rates
		1990_number(95%UI)	2021_number(95%UI)	percentage change(100%)	1990_per 100000(95%UI)	2021_per 100000(95%UI)	EAPC(95% CI)
	55-59	10052.85 (8721.92-11335.99)	17812.38 (14064.93-20892.88)	0.77 (0.61-0.84)	5.43 (4.71-6.12)	4.5 (3.55-5.28)	-0.68 (-0.75--0.6)
	55+	92729.48 (83666.09-100988.05)	192028.39 (163006.93-216508.46)	1.07 (0.95-1.14)	13.81 (12.46-15.04)	12.92 (10.97-14.57)	-0.28 (-0.31--0.25)
	60-64	13731.4 (12194.91-15311.51)	22664.59 (18644.18-25726.4)	0.65 (0.53-0.68)	8.55 (7.59-9.53)	7.08 (5.83-8.04)	-0.64 (-0.7--0.59)
	65-69	16116.9 (14635.48-17925.86)	29765.46 (24191.79-34017.62)	0.85 (0.65-0.9)	13.04 (11.84-14.5)	10.79 (8.77-12.33)	-0.67 (-0.72--0.61)
Global	70-74	15610.25 (14160.76-17345.5)	32910.36 (27650.07-37280.86)	1.11 (0.95-1.15)	18.44 (16.73-20.49)	15.99 (13.43-18.11)	-0.61 (-0.65--0.56)
	75-79	16456.08 (15040.61-17654.47)	29561.84 (25059.04-33219.76)	0.8 (0.67-0.88)	26.73 (24.43-28.68)	22.41 (19-25.19)	-0.56 (-0.62--0.51)
	80-84	12158.24 (10801.96-13068.66)	26690.33 (22128.18-29718.67)	1.2 (1.05-1.27)	34.37 (30.53-36.94)	30.47 (25.27-33.93)	-0.42 (-0.49--0.35)
	85-89	6234.23 (5349.05-6792.59)	19190.76 (15527.28-21767.43)	2.08 (1.9-2.2)	41.26 (35.4-44.95)	41.97 (33.96-47.61)	-0.03 (-0.1-0.05)
	90-94	1965.52 (1614.02-2176.91)	9893 (7481.13-11525.02)	4.03 (3.64-4.29)	45.87 (37.67-50.8)	55.3 (41.82-64.42)	0.6 (0.55-0.65)
	95+	404.01 (305.4-458.8)	3539.66 (2386.43-4298.87)	7.76 (6.81-8.37)	39.68 (30-45.07)	64.94 (43.79-78.87)	1.66 (1.56-1.76)
	55-59	306.74 (226.74-427.92)	709.59 (475.83-913.66)	1.31 (1.1-1.14)	2.62 (1.94-3.66)	2.8 (1.88-3.61)	0.06 (-0.06-0.18)
	55+	1746.14 (1394.47-2429.13)	4910.12 (3366.26-6009.86)	1.81 (1.41-1.47)	4.68 (3.74-6.51)	5.98 (4.1-7.32)	0.91 (0.85-0.97)
	60-64	384.72 (298.02-535.63)	892.52 (615.21-1137.62)	1.32 (1.06-1.12)	4.12 (3.19-5.74)	4.53 (3.12-5.77)	0.32 (0.22-0.43)
	65-69	379.79 (291.27-525)	996.79 (661.14-1243.85)	1.62 (1.27-1.37)	5.46 (4.19-7.55)	6.61 (4.39-8.25)	0.76 (0.67-0.85)
	70-74	316.49 (257.35-438.48)	992.79 (683.35-1252.2)	2.14 (1.66-1.86)	6.69 (5.44-9.27)	9.57 (6.59-12.07)	1.36 (1.27-1.45)
Low SDI	75-79	202.54 (159.24-282.75)	652.03 (446.89-808.03)	2.22 (1.81-1.86)	7.47 (5.87-10.42)	10.15 (6.96-12.58)	1.24 (1.14-1.34)
	80-84	107 (84.88-152.94)	430.14 (295.18-528.06)	3.02 (2.48-2.45)	8.24 (6.54-11.78)	12.75 (8.75-15.65)	1.67 (1.44-1.91)
	85-89	39.09 (29.87-55.93)	185.47 (123.17-234.28)	3.74 (3.12-3.19)	8.58 (6.56-12.28)	13.89 (9.23-17.55)	1.7 (1.4-2)
	90-94	8.49 (6.11-12.63)	44.91 (30.7-59.06)	4.29 (4.02-3.68)	7.51 (5.4-11.17)	12.53 (8.57-16.48)	1.99 (1.66-2.31)
	95+	1.27 (0.88-2)	5.89 (3.71-8.1)	3.64 (3.22-3.05)	5.3 (3.65-8.32)	7.74 (4.87-10.64)	2.08 (1.7-2.47)
	55-59	1159.19 (956.9-1671.45)	3112.95 (2332.19-3924.4)	1.69 (1.44-1.35)	3.73 (3.08-5.37)	4.48 (3.36-5.65)	0.57 (0.5-0.64)
	55+	6939.97 (5953.16-9970.96)	21123.48 (16675.37-26296.15)	2.04 (1.8-1.64)	6.88 (5.91-9.89)	8.76 (6.92-10.91)	0.85 (0.8-0.9)
	60-64	1476.39 (1232.92-2082.59)	3778.5 (2905.22-4577.93)	1.56 (1.36-1.2)	5.83 (4.87-8.23)	6.61 (5.08-8.01)	0.51 (0.44-0.59)
	65-69	1397.27 (1172.14-1985.03)	4128.17 (3218.68-5192.31)	1.95 (1.75-1.62)	7.69 (6.45-10.92)	9.31 (7.26-11.7)	0.71 (0.64-0.79)
Low-middle SDI	70-74	1201.68 (992.17-1747.91)	3960.9 (3104.65-4905.56)	2.3 (2.13-1.81)	9.78 (8.07-14.23)	12.6 (9.87-15.6)	0.8 (0.71-0.89)
	75-79	857.32 (728.94-1206.4)	2783.75 (2259.27-3585.02)	2.25 (2.1-1.97)	11.31 (9.62-15.92)	13.86 (11.25-17.85)	0.73 (0.67-0.78)
	80-84	533.9 (442.25-747.84)	2005.26 (1583.77-2544.4)	2.76 (2.58-2.4)	12.83 (10.63-17.97)	17.44 (13.77-22.12)	1.14 (1.04-1.25)
	85-89	238.88 (195.3-336.6)	972.81 (752.61-1248.52)	3.07 (2.85-2.71)	14.45 (11.81-20.36)	19.47 (15.06-24.99)	1.12 (1-1.25)
	90-94	63.58 (50.2-89.33)	315.81 (245.77-419.7)	3.97 (3.9-3.7)	14.4 (11.37-20.23)	19.52 (15.19-25.94)	1.18 (1.02-1.33)
	95+	11.76 (8.8-16.37)	65.34 (47.29-83.71)	4.56 (4.37-4.11)	11.64 (8.71-16.21)	14.41 (10.43-18.46)	0.99 (0.81-1.16)
	55-59	2422.06 (2033.95-3063.43)	5764.44 (4541.72-7338.73)	1.38 (1.23-1.4)	4.56 (3.83-5.76)	4.18 (3.29-5.32)	-0.41 (-0.55--0.28)
	55+	15589.56 (13681.77-20107.4)	44488 (36182.71-57850.35)	1.85 (1.64-1.88)	8.98 (7.88-11.59)	9.47 (7.7-12.31)	0.07 (0-0.14)
	60-64	2935.19 (2493.88-3679.87)	6670.89 (5316.16-8062.51)	1.27 (1.13-1.19)	6.85 (5.82-8.59)	6.55 (5.22-7.92)	-0.23 (-0.32--0.14)
	65-69	3004.48 (2602.61-3927.14)	8376.67 (6634.63-10850.9)	1.79 (1.55-1.76)	9.43 (8.17-12.32)	9.4 (7.44-12.17)	-0.12 (-0.18--0.05)
Middle SDI	70-74	2821.12 (2434.32-3701.61)	8185.88 (6647.04-10771.52)	1.9 (1.73-1.91)	12.91 (11.14-16.94)	13.28 (10.79-17.48)	0.03 (-0.05-0.1)
	75-79	2222.8 (1932.47-2901.82)	6703.72 (5473.55-8972.54)	2.02 (1.83-2.09)	16.62 (14.45-21.7)	17.11 (13.97-22.9)	0.08 (-0.01-0.18)
	80-84	1355.07 (1146.06-1733.37)	4875.5 (3945.62-6140.99)	2.6 (2.44-2.54)	19.55 (16.54-25.01)	20.47 (16.56-25.78)	0.04 (-0.06-0.15)
	85-89	648.97 (548.23-793.1)	2766.83 (2192.98-3577.47)	3.26 (3-3.51)	23.79 (20.09-29.07)	24.13 (19.12-31.2)	-0.04 (-0.14-0.06)
	90-94	153.34 (124.62-187.77)	932.46 (723.47-1193.11)	5.08 (4.81-5.35)	23.16 (18.82-28.36)	24.19 (18.77-30.95)	0.03 (-0.07-0.12)
	95+	26.53 (20.05-34.12)	211.6 (151.82-267.66)	6.98 (6.57-6.84)	18.06 (13.65-23.23)	20.34 (14.59-25.73)	0.26 (0.13-0.39)
	55-59	2694.98 (2266.79-2951.68)	4572.4 (3323.49-5488.22)	0.7 (0.47-0.86)	5.8 (4.88-6.35)	5.08 (3.7-6.1)	-0.52 (-0.6--0.45)
	55+	23675.74 (20762.08-25317.78)	46880.01 (36383.24-53931.06)	0.98 (0.75-1.13)	13.72 (12.03-14.67)	13.52 (10.49-15.56)	-0.15 (-0.22--0.08)
	60-64	3848.38 (3344.07-4138.25)	5723.68 (4317.99-6766.6)	0.49 (0.29-0.64)	8.94 (7.77-9.61)	7.85 (5.92-9.28)	-0.48 (-0.55--0.41)
	65-69	4292.94 (3714.97-4611.1)	7876.87 (5935.22-9419.6)	0.83 (0.6-1.04)	13.62 (11.78-14.63)	11.86 (8.94-14.19)	-0.47 (-0.56--0.38)
High-middle SDI	70-74	3995.76 (3503.76-4319.54)	8496.67 (6471.38-9889.06)	1.13 (0.85-1.29)	19.35 (16.97-20.92)	17.39 (13.25-20.24)	-0.42 (-0.49--0.35)
	75-79	4302.62 (3842.89-4589.01)	7385.92 (5746.76-8629.61)	0.72 (0.5-0.88)	25.85 (23.09-27.57)	24.73 (19.24-28.89)	-0.32 (-0.4--0.24)
	80-84	2848.2 (2497.55-3078.14)	6524.45 (5152.79-7491.78)	1.29 (1.06-1.43)	30.6 (26.83-33.07)	29.88 (23.6-34.32)	-0.18 (-0.25--0.1)
	85-89	1260.11 (1077.35-1379.69)	4187.2 (3330.89-4852.35)	2.32 (2.09-2.52)	33.7 (28.81-36.89)	36.8 (29.28-42.65)	0.1 (-0.05-0.25)
	90-94	363.02 (308.46-400.24)	1708.19 (1354.4-1981.45)	3.71 (3.39-3.95)	39.02 (33.16-43.03)	39.07 (30.98-45.32)	-0.01 (-0.16-0.15)
	95+	69.72 (54.77-78.89)	404.64 (300.2-475.22)	4.8 (4.48-5.02)	36.97 (29.04-41.84)	36.66 (27.2-43.05)	-0.09 (-0.26-0.07)
	55-59	3456.64 (3197.63-3642.1)	3641.4 (3254.54-3919.37)	0.05 (0.02-0.08)	8.12 (7.51-8.56)	5.01 (4.47-5.39)	-1.6 (-1.69--1.5)
	55+	44647.95 (41456.29-46591.12)	74481.48 (64593.18-81772.73)	0.67 (0.56-0.76)	23.94 (22.23-24.99)	21.59 (18.72-23.7)	-0.44 (-0.49--0.39)
	60-64	5067.09 (4765.57-5303.37)	5581.37 (4941.38-6039.77)	0.1 (0.04-0.14)	12.7 (11.94-13.29)	8.19 (7.25-8.86)	-1.53 (-1.6--1.46)
	65-69	7017.56 (6616.86-7328.58)	8362.6 (7429.34-9090.63)	0.19 (0.12-0.24)	20.08 (18.93-20.97)	13.79 (12.25-14.99)	-1.36 (-1.44--1.29)
High SDI	70-74	7256.22 (6785.8-7567.87)	11247.23 (10154-12209.94)	0.55 (0.5-0.61)	28.97 (27.09-30.21)	21.08 (19.03-22.88)	-1.13 (-1.21--1.04)
	75-79	8845.95 (8157.92-9297.31)	12012.61 (10617.82-13216.03)	0.36 (0.3-0.42)	41.78 (38.53-43.91)	33.17 (29.32-36.5)	-0.7 (-0.75--0.64)
	80-84	7296.14 (6375.5-7832.28)	12834.41 (10558.29-14412.23)	0.76 (0.66-0.84)	53.53 (46.77-57.46)	47.58 (39.14-53.43)	-0.35 (-0.44--0.26)
	85-89	4039.17 (3389.3-4411.96)	11065.18 (8650.11-12792.89)	1.74 (1.55-1.9)	62 (52.03-67.73)	67.07 (52.43-77.54)	0.17 (0.09-0.26)
	90-94	1374.81 (1094.46-1532.07)	6886.06 (4999.96-8183.86)	4.01 (3.57-4.34)	64.44 (51.3-71.81)	89.82 (65.22-106.75)	1.03 (0.98-1.09)
	95+	294.37 (217.98-338.25)	2850.62 (1875.53-3504.19)	8.68 (7.6-9.36)	52.89 (39.17-60.77)	102.9 (67.7-126.49)	2.36 (2.21-2.51)

## Sheet: Table S10
The DALY of GBTC cases and rates aged 55 years and above in 1990 and 2021 across 9 age groups globally and in 5 territories, and the trends from 1990 to 2021.
location	Age(years)	DALY cases			DALY rates
		1990_number(95%UI)	2021_number(95%UI)	percentage change(100%)	1990_per 100000(95%UI)	2021_per 100000(95%UI)	EAPC(95% CI)
	55-59	293685.2 (250756.56-337140.78)	444477.65 (348720.6-527021.9)	0.51 (0.39-0.56)	158.58 (135.4-182.04)	112.32 (88.12-133.18)	-1.23 (-1.32--1.14)
	55+	1787213.43 (1617188.16-1980946.07)	2999189.07 (2489402.8-3445818.59)	0.68 (0.54-0.74)	266.18 (240.86-295.04)	201.83 (167.53-231.89)	-1.01 (-1.05--0.96)
	60-64	356302.56 (312094.44-403369.32)	513988.75 (418251.92-582510.77)	0.44 (0.34-0.44)	221.84 (194.32-251.15)	160.6 (130.68-182.01)	-1.14 (-1.19--1.08)
	65-69	352006.82 (315707.94-397428.93)	562475.28 (455208.03-648200.33)	0.6 (0.44-0.63)	284.77 (255.41-321.52)	203.91 (165.02-234.99)	-1.18 (-1.23--1.13)
Global	70-74	291309.13 (261638.14-330391.81)	528541.87 (434993.33-611896.48)	0.81 (0.66-0.85)	344.09 (309.04-390.25)	256.77 (211.33-297.27)	-1.11 (-1.16--1.06)
	75-79	253499.37 (229794.51-275859.66)	388571.39 (325704.23-441040.17)	0.53 (0.42-0.6)	411.82 (373.31-448.15)	294.63 (246.96-334.41)	-1.1 (-1.15--1.05)
	80-84	152250.16 (135343.63-164169.36)	282908.3 (234847.63-316114.84)	0.86 (0.74-0.93)	430.38 (382.59-464.07)	323.02 (268.14-360.93)	-0.97 (-1.03--0.92)
	85-89	65388.11 (56585.82-71083.1)	171388.46 (141526.26-193919.34)	1.62 (1.5-1.73)	432.72 (374.47-470.4)	374.85 (309.54-424.13)	-0.55 (-0.6--0.49)
	90-94	18939.93 (15679.26-20893.07)	79387.04 (61693.99-91542)	3.19 (2.93-3.38)	441.99 (365.89-487.56)	443.77 (344.86-511.71)	-0.02 (-0.08-0.05)
	95+	3832.16 (2924.9-4342.18)	27450.32 (18923.23-32544.95)	6.16 (5.47-6.5)	376.41 (287.29-426.5)	503.65 (347.2-597.12)	1.01 (0.92-1.1)
	55-59	10155.57 (7516.35-14193.04)	23092.1 (15433.49-29673.72)	1.27 (1.05-1.09)	86.88 (64.3-121.42)	91.16 (60.93-117.14)	0.01 (-0.11-0.12)
	55+	44496.99 (35289.18-61965.48)	117968.87 (81115.81-144980.33)	1.65 (1.3-1.34)	119.27 (94.59-166.09)	143.76 (98.85-176.68)	0.68 (0.63-0.74)
	60-64	11303.35 (8806.79-15936.41)	25846.47 (17888.92-32855.03)	1.29 (1.03-1.06)	121.11 (94.36-170.75)	131.09 (90.73-166.64)	0.28 (0.17-0.38)
	65-69	9764.37 (7456.35-13604.92)	25160.79 (16770.57-31366.28)	1.58 (1.25-1.31)	140.42 (107.23-195.65)	166.89 (111.24-208.05)	0.7 (0.61-0.79)
	70-74	7062.38 (5729.12-9632.63)	21812.59 (14969.75-27419.07)	2.09 (1.61-1.85)	149.39 (121.18-203.75)	210.33 (144.35-264.4)	1.31 (1.22-1.4)
Low SDI	75-79	3839.6 (3033.7-5375.8)	12171.2 (8319.82-15104.84)	2.17 (1.74-1.81)	141.52 (111.82-198.14)	189.56 (129.58-235.25)	1.18 (1.09-1.28)
	80-84	1713.52 (1354.27-2440.67)	6753.82 (4622.02-8310.47)	2.94 (2.41-2.4)	131.93 (104.27-187.92)	200.23 (137.03-246.37)	1.62 (1.39-1.85)
	85-89	532.9 (409.79-772.76)	2489.16 (1677.06-3152.34)	3.67 (3.09-3.08)	116.99 (89.96-169.65)	186.46 (125.63-236.14)	1.65 (1.36-1.94)
	90-94	108.47 (78.07-160.35)	565.22 (384.29-742.06)	4.21 (3.92-3.63)	95.93 (69.04-141.82)	157.68 (107.2-207.01)	1.94 (1.61-2.27)
	95+	16.83 (11.64-26.88)	77.51 (51.01-107.35)	3.61 (3.38-2.99)	70.02 (48.44-111.82)	101.88 (67.05-141.1)	2.05 (1.67-2.44)
	55-59	38112.91 (31326.92-55345.72)	99680.96 (73614.85-125782.71)	1.62 (1.35-1.27)	122.56 (100.74-177.98)	143.5 (105.98-181.08)	0.49 (0.42-0.56)
	55+	172272.88 (147190.51-248674.33)	495546.42 (384643.84-614391.77)	1.88 (1.61-1.47)	170.9 (146.02-246.7)	205.55 (159.55-254.85)	0.65 (0.6-0.7)
	60-64	43156.62 (36067.05-61641.9)	107919.09 (82494.43-131171.83)	1.5 (1.29-1.13)	170.52 (142.51-243.56)	188.78 (144.31-229.46)	0.44 (0.37-0.52)
	65-69	35694.2 (29831.21-51178.31)	102739.6 (79684.12-128994.62)	1.88 (1.67-1.52)	196.44 (164.18-281.66)	231.6 (179.63-290.79)	0.63 (0.55-0.71)
Low-middle SDI	70-74	26601.04 (21920.97-38658.69)	85758.68 (66724.97-106137.22)	2.22 (2.04-1.75)	216.5 (178.41-314.63)	272.71 (212.18-337.51)	0.73 (0.63-0.82)
	75-79	16086.82 (13674.55-22667.28)	51034.8 (41280.52-65634.09)	2.17 (2.02-1.9)	212.25 (180.42-299.07)	254.17 (205.59-326.88)	0.65 (0.59-0.7)
	80-84	8447.91 (7022.72-11849.47)	30904.18 (24656.21-38994.6)	2.66 (2.51-2.29)	202.97 (168.73-284.7)	268.72 (214.39-339.07)	1.07 (0.96-1.17)
	85-89	3218.5 (2630.97-4533.25)	12799.01 (10074.84-16357.8)	2.98 (2.83-2.61)	194.64 (159.11-274.15)	256.13 (201.62-327.35)	1.05 (0.93-1.18)
	90-94	804.49 (637.28-1132.2)	3894.45 (3030.01-5112.73)	3.84 (3.75-3.52)	182.23 (144.36-256.47)	240.66 (187.24-315.95)	1.1 (0.94-1.25)
	95+	150.4 (113.51-209)	815.65 (589.84-1054.94)	4.42 (4.2-4.05)	148.87 (112.36-206.89)	179.86 (130.07-232.63)	0.89 (0.71-1.07)
	55-59	77706.35 (65309.56-98999.98)	155387.84 (121532.88-195063.74)	1 (0.86-0.97)	146.16 (122.84-186.21)	112.64 (88.1-141.41)	-0.98 (-1.1--0.86)
	55+	370154.12 (324067.1-479260.67)	856494.19 (693809.73-1087203.65)	1.31 (1.14-1.27)	213.27 (186.72-276.13)	182.29 (147.66-231.39)	-0.64 (-0.7--0.58)
	60-64	83990.42 (71041.44-105495.37)	166315.52 (131768.46-198220.94)	0.98 (0.85-0.88)	196.1 (165.86-246.31)	163.4 (129.46-194.75)	-0.75 (-0.82--0.67)
	65-69	74945.1 (65135.6-98305.99)	176478.97 (140984.63-225058.84)	1.35 (1.16-1.29)	235.17 (204.39-308.48)	197.99 (158.17-252.49)	-0.68 (-0.74--0.63)
Middle SDI	70-74	60949.41 (52545.47-80289.81)	148718.04 (120810.53-193369.25)	1.44 (1.3-1.41)	278.86 (240.41-367.35)	241.32 (196.03-313.77)	-0.55 (-0.61--0.5)
	75-79	40845.52 (35754.66-53463.85)	103025.94 (84971.71-135761.72)	1.52 (1.38-1.54)	305.48 (267.41-399.85)	262.95 (216.87-346.5)	-0.52 (-0.57--0.46)
	80-84	20903.7 (17861.8-26705.25)	63153.4 (51771.09-78599.8)	2.02 (1.9-1.94)	301.63 (257.74-385.35)	265.12 (217.34-329.96)	-0.55 (-0.62--0.48)
	85-89	8572.19 (7276.3-10491.86)	31086.99 (24831.56-39836.93)	2.63 (2.41-2.8)	314.19 (266.69-384.55)	271.08 (216.53-347.38)	-0.55 (-0.62--0.48)
	90-94	1905.19 (1539.9-2316.38)	9978.51 (7746.96-12773.77)	4.24 (4.03-4.51)	287.79 (232.61-349.9)	258.82 (200.94-331.32)	-0.46 (-0.55--0.37)
	95+	336.23 (258.8-430.6)	2348.97 (1691.42-2946.41)	5.99 (5.54-5.84)	228.93 (176.21-293.18)	225.78 (162.58-283.21)	-0.2 (-0.35--0.05)
	55-59	79919.64 (66244.87-88159.71)	101073.19 (75003.25-119480.58)	0.26 (0.13-0.36)	171.91 (142.49-189.63)	112.38 (83.4-132.85)	-1.51 (-1.61--1.42)
	55+	486666.35 (423442.28-524488.97)	704745.66 (547705.36-806559.73)	0.45 (0.29-0.54)	282.09 (245.44-304.01)	203.29 (157.99-232.65)	-1.22 (-1.31--1.13)
	60-64	101646.32 (87847.11-110061.88)	118768.64 (91474.06-137737.65)	0.17 (0.04-0.25)	236.13 (204.07-255.68)	162.84 (125.42-188.85)	-1.31 (-1.39--1.23)
	65-69	97688.67 (83357.38-105421.8)	137289.64 (104758.25-161713.85)	0.41 (0.26-0.53)	309.88 (264.42-334.41)	206.75 (157.76-243.53)	-1.37 (-1.44--1.29)
High-middle SDI	70-74	78655.49 (68021.46-85487.18)	128949.21 (99948.19-149591.7)	0.64 (0.47-0.75)	380.88 (329.39-413.96)	263.98 (204.61-306.24)	-1.3 (-1.37--1.24)
	75-79	70549.31 (61923.89-75711.2)	94266.23 (73710.12-110103.77)	0.34 (0.19-0.45)	423.84 (372.02-454.85)	315.61 (246.79-368.63)	-1.19 (-1.26--1.11)
	80-84	38756.55 (33831.81-41757.34)	68311.31 (54443.81-77663.84)	0.76 (0.61-0.86)	416.4 (363.49-448.64)	312.89 (249.37-355.73)	-1.07 (-1.15--0.99)
	85-89	14738.3 (12679.04-16142.22)	38313.92 (30560.18-43981.44)	1.6 (1.41-1.72)	394.1 (339.04-431.64)	336.76 (268.61-386.57)	-0.72 (-0.88--0.56)
	90-94	3937.5 (3351.04-4350.72)	14320.68 (11389.44-16497.05)	2.64 (2.4-2.79)	423.29 (360.24-467.71)	327.57 (260.52-377.35)	-0.88 (-1.02--0.73)
	95+	774.57 (604.2-874.79)	3452.83 (2555.25-4004.7)	3.46 (3.23-3.58)	410.75 (320.41-463.9)	312.79 (231.48-362.79)	-0.96 (-1.09--0.83)
	55-59	87384.43 (79689.14-92620.8)	64928.58 (56724.83-70430.67)	-0.26 (-0.29--0.24)	205.35 (187.27-217.66)	89.27 (77.99-96.83)	-2.8 (-2.91--2.69)
	55+	710900.4 (663136.87-742212.6)	821870.88 (720349.24-899678.7)	0.16 (0.09-0.21)	381.25 (355.64-398.05)	238.21 (208.79-260.77)	-1.69 (-1.76--1.62)
	60-64	115667.47 (107799.69-121460.21)	94701.9 (82094.64-103222.26)	-0.18 (-0.24--0.15)	289.84 (270.12-304.36)	138.92 (120.43-151.42)	-2.57 (-2.69--2.45)
	65-69	133327.85 (125076.36-139664.94)	120291.61 (104763.78-131219.25)	-0.1 (-0.16--0.06)	381.53 (357.92-399.67)	198.42 (172.81-216.44)	-2.38 (-2.48--2.27)
High SDI	70-74	117653.27 (109805.27-122906.78)	142816.25 (127733.23-154762.03)	0.21 (0.16-0.26)	469.69 (438.36-490.66)	267.64 (239.38-290.03)	-2.02 (-2.11--1.93)
	75-79	121755.42 (112526.65-127688.71)	127720.52 (112444.43-140577.51)	0.05 (0-0.1)	575.07 (531.48-603.1)	352.69 (310.51-388.19)	-1.54 (-1.6--1.48)
	80-84	82174.73 (72453.19-87979.89)	113535.72 (95359.88-127293.89)	0.38 (0.32-0.45)	602.85 (531.53-645.44)	420.93 (353.55-471.94)	-1.15 (-1.22--1.07)
	85-89	38228.69 (32284.86-41545.23)	86561.41 (67611.78-98756)	1.26 (1.09-1.38)	586.84 (495.6-637.75)	524.68 (409.82-598.59)	-0.44 (-0.52--0.36)
	90-94	12158.42 (9810.78-13451.62)	50574.85 (37267.16-58618.34)	3.16 (2.8-3.36)	569.88 (459.84-630.49)	659.68 (486.1-764.59)	0.41 (0.34-0.49)
	95+	2550.1 (1890.13-2915.24)	20740.04 (13935.2-24926.1)	7.13 (6.37-7.55)	458.18 (339.6-523.79)	748.67 (503.03-899.78)	1.8 (1.65-1.95)
